# Supplementary material for: Network neighbors of viral targets and differentially expressed genes in COVID-19 are drug target candidates
Source: Sci Rep. 2021 Sep 23;11:18985. doi: 10.1038/s41598-021-98289-x (PMC8460804; doi:10.1038/s41598-021-98289-x)
Supplement: Supplementary file 4 — Supplementary Information 4. [file 41598_2021_98289_MOESM4_ESM.csv]

Orbits	VI vs DEG	VI vs Common Neighbors	VI vs VI-unique neighbors	VI vs DEG-unique neighbors	VI vs Background	DEG vs Common neighbors	DEG vs VI-unique neighbors	DEG vs DEG-unique neighbors	DEG vs Background	Common neighbors vs VI-unique neighbors	Common neighbors EG-unique neighbors	Common neighbors vs Background	VI-unique neighbors vs DEG-unique neighbors	VI-unique neighbors vs Background	DEG-unique neighbors vs Background
0	8.84666920370691E-016	4.39594092290852E-005	1.48076675586188E-092	8.2381648429414E-078	7.90488635546136E-124	4.03333825943413E-127	2.82016938537217E-066	3.61352800493444E-065	6.47381481469814E-238	9.98505471489959E-250	0	0	1.28195445524747E-027	8.08864757956985E-006	5.41411222994889E-229
1	6.49346038041071E-022	0.2100101048	1.36947665843901E-076	4.5851852432233E-081	2.43393374572631E-120	1.59617935551966E-079	1.00148062683234E-047	6.90854982347794E-061	6.941642123714E-202	4.76337831082799E-171	0	0	1.33177434670252E-012	2.33888433881371E-005	9.24406050893733E-162
2	3.77778342695237E-017	0.0050239666	6.69100996732814E-093	3.37697869788645E-082	2.42117774440393E-127	1.79684789726868E-112	1.98940417034172E-066	7.99909093351106E-069	4.98312253855109E-239	5.25539462333552E-235	0	0	2.92344089905065E-026	2.64687091477201E-005	4.99195239669765E-216
3	3.69850414173589E-013	2.70028238507175E-005	1.15550493855907E-076	2.70531832349465E-062	2.55132455635855E-104	2.45459791457948E-113	1.77592481108833E-054	1.58869572696381E-055	4.03787670559767E-188	1.23092703563028E-210	0	0	1.1669087572318E-016	0.0024284449	1.04700507267232E-142
4	1.36228196867223E-016	0.2124205963	1.34527741500884E-076	4.06993916671798E-077	1.29575919244212E-118	2.47762659021166E-091	1.56170681773075E-050	3.52603088843358E-068	7.59433076357336E-221	2.88156122779291E-194	0	0	5.18375805362143E-012	2.80631478538925E-008	2.61035500274397E-180
5	1.22830503754185E-021	0.6461292953	1.08165498482589E-094	3.90815638252419E-091	6.63970507771059E-134	4.30240847725605E-099	1.90744348965646E-063	2.58835703460545E-069	7.37617983901672E-240	1.13322179806882E-219	0	0	1.31460511365816E-022	2.64659943102909E-006	2.25499440470418E-215
6	1.24896997212876E-024	1.22027445341123E-006	1.53195735674069E-060	1.76492883940092E-068	2.42102544571776E-101	1.12782211116363E-037	5.34470135883905E-029	1.00014394130881E-039	4.04521112623641E-139	4.3882795135609E-091	0	0	1.72651580817131E-006	0.0002266731	4.40091534813561E-100
7	1.3814613799289E-017	0.030549572	1.40274183890535E-092	1.08444581495487E-082	3.64412842865902E-127	7.61891153434404E-102	2.49565703568178E-066	4.3391426476593E-069	1.10968048561103E-234	4.20896509170555E-220	0	0	1.94001084190272E-025	0.0007636027	2.24308546888476E-200
8	7.3482859935733E-021	0.7133802765	5.58556422472119E-081	2.89310276702847E-083	8.7992907994466E-125	1.64281332859477E-084	6.58622842607348E-049	3.61708094237496E-062	4.60979972375301E-219	6.06085245662481E-182	0	0	2.27423201326145E-013	9.40323093285431E-009	2.03384129141257E-190
9	9.23072314147955E-019	0.5402250561	8.08375409622593E-064	3.15069223544265E-069	1.01646754794673E-105	3.35818085647384E-075	2.33092116491823E-038	2.92896593886181E-056	1.57447872990639E-179	3.71985556230672E-146	0	0	5.68675791379244E-007	1.58994439587451E-006	9.22221785749782E-126
10	5.34264011934354E-016	0.0464284661	1.81897936106114E-074	3.90134846425303E-071	2.98055146503649E-111	9.44549508274901E-097	6.01217967115088E-050	3.5929785548317E-061	4.39722214626315E-200	3.16834337070349E-190	0	0	4.81143833650479E-013	0.000016577	3.48768607722653E-156
11	1.12405806762056E-015	0.00079132	3.80273644307588E-089	3.89672790055621E-077	4.20392228045229E-119	1.74699826163754E-113	2.1870659625875E-064	2.94493720041068E-066	1.58825114455813E-216	6.78605379568984E-231	0	0	3.3777730346519E-024	0.0066836542	2.01307146539498E-173
12	9.04382375646374E-014	0.0063088514	5.8946447955807E-061	1.37264036950088E-062	1.57283498854623E-101	3.64331655364759E-098	3.77111261281555E-040	7.88623307746879E-056	6.03552348129047E-185	2.86911195511682E-169	0	0	2.67834569961996E-009	3.91364953109604E-006	1.57522672846394E-141
13	7.53877680296819E-015	0.014762353	6.36997522573529E-081	9.64054164336119E-071	8.82269029913439E-107	1.15442076489364E-092	5.55561284074354E-058	1.59553604532947E-066	1.26976673157559E-183	9.27117106760232E-191	0	0	2.16812924002319E-015	0.1607668491	3.04974331968678E-105
14	1.85899427401314E-009	8.68659792026273E-006	1.37722756989919E-065	2.16085852327139E-045	1.70041818250547E-075	1.58431020421139E-093	4.76674050609668E-053	1.66621467123741E-050	1.14577196456325E-140	1.42476805732047E-169	0	0	6.17788992994541E-013	0.8133535228	3.44835365755347E-066
