# Supplementary material for: Network neighbors of viral targets and differentially expressed genes in COVID-19 are drug target candidates
Source: Sci Rep. 2021 Sep 23;11:18985. doi: 10.1038/s41598-021-98289-x (PMC8460804; doi:10.1038/s41598-021-98289-x)
Supplement: Supplementary file 5 — Supplementary Information 5. [file 41598_2021_98289_MOESM5_ESM.csv]

P-value	Source	Term id	Term name	Term size	Query size	Intersection size	Precision	Recall
4.058022002011095e-09	CORUM	CORUM:3055	Nop56p-associated pre-rRNA complex	104	1877	85	0.045285	0.817308
2.554646587555556e-07	CORUM	CORUM:306	Ribosome, cytoplasmic	80	1877	66	0.035162	0.825
6.898689006666286e-06	CORUM	CORUM:1181	C complex spliceosome	79	1877	63	0.033564	0.797468
0.0003092034960466601	CORUM	CORUM:351	Spliceosome	139	1877	97	0.051678	0.697842
0.0011568630164317769	CORUM	CORUM:320	55S ribosome, mitochondrial	78	1877	58	0.0309	0.74359
0.001157289294749858	CORUM	CORUM:308	60S ribosomal subunit, cytoplasmic	47	1877	38	0.020245	0.808511
0.002587673790142169	CORUM	CORUM:305	40S ribosomal subunit, cytoplasmic	33	1877	28	0.014917	0.848485
0.0070919592669380456	CORUM	CORUM:338	40S ribosomal subunit, cytoplasmic	31	1877	26	0.013852	0.83871
0.011979378413636764	CORUM	CORUM:2755	17S U2 snRNP	33	1877	27	0.014385	0.818182
0.022314665594736938	CORUM	CORUM:1332	Large Drosha complex	19	1877	17	0.009057	0.894737
0.029158155083507387	CORUM	CORUM:324	39S ribosomal subunit, mitochondrial	48	1877	36	0.01918	0.75
0.048440450576883634	CORUM	CORUM:1183	CDC5L complex	30	1877	24	0.012786	0.8
3.756659257155437e-165	GO:BP	GO:0044237	cellular metabolic process	10936	5343	4054	0.75875	0.370702
1.354769547361463e-127	GO:BP	GO:0044238	primary metabolic process	10670	5343	3886	0.727307	0.364199
1.3318947380175447e-126	GO:BP	GO:0008152	metabolic process	11952	5343	4229	0.791503	0.353832
1.3019967826431033e-120	GO:BP	GO:1901564	organonitrogen compound metabolic process	6961	5343	2776	0.519558	0.398793
3.396523946013954e-117	GO:BP	GO:0071704	organic substance metabolic process	11368	5343	4048	0.757627	0.356087
8.5461784181786e-105	GO:BP	GO:0006807	nitrogen compound metabolic process	10163	5343	3678	0.688377	0.361901
9.225854107485775e-93	GO:BP	GO:1901576	organic substance biosynthetic process	6242	5343	2464	0.461164	0.394745
8.48529133672758e-92	GO:BP	GO:0009058	biosynthetic process	6328	5343	2488	0.465656	0.393173
2.014348115754556e-88	GO:BP	GO:0044249	cellular biosynthetic process	6139	5343	2417	0.452368	0.393712
1.389726130055039e-83	GO:BP	GO:0044248	cellular catabolic process	2338	5343	1115	0.208684	0.476903
8.172421693747954e-82	GO:BP	GO:0044267	cellular protein metabolic process	5424	5343	2166	0.40539	0.399336
1.6624092327226607e-81	GO:BP	GO:0009056	catabolic process	2721	5343	1249	0.233764	0.459022
3.460861113614805e-78	GO:BP	GO:1901575	organic substance catabolic process	2259	5343	1072	0.200636	0.474546
3.0213157784564085e-75	GO:BP	GO:1901566	organonitrogen compound biosynthetic process	1856	5343	914	0.171065	0.492457
4.4083168116814476e-74	GO:BP	GO:0034641	cellular nitrogen compound metabolic process	6496	5343	2479	0.463972	0.381619
2.77309391315905e-69	GO:BP	GO:0019538	protein metabolic process	5996	5343	2304	0.431218	0.384256
9.192392505173441e-69	GO:BP	GO:0044281	small molecule metabolic process	2028	5343	962	0.180049	0.474359
9.519247359168312e-63	GO:BP	GO:0006996	organelle organization	4044	5343	1647	0.308254	0.40727
8.087182314489976e-62	GO:BP	GO:0036211	protein modification process	4274	5343	1720	0.321917	0.402433
8.087182314489976e-62	GO:BP	GO:0006464	cellular protein modification process	4274	5343	1720	0.321917	0.402433
1.5426061502865632e-61	GO:BP	GO:1901360	organic cyclic compound metabolic process	6177	5343	2331	0.436272	0.377368
7.646677405797742e-61	GO:BP	GO:0006793	phosphorus metabolic process	3434	5343	1435	0.268576	0.41788
9.285266379578827e-59	GO:BP	GO:0006796	phosphate-containing compound metabolic process	3408	5343	1419	0.265581	0.416373
1.5448189110864964e-57	GO:BP	GO:0006725	cellular aromatic compound metabolic process	5939	5343	2240	0.41924	0.377168
1.4806094577403836e-56	GO:BP	GO:0043412	macromolecule modification	4489	5343	1771	0.331462	0.39452
1.616155917966033e-56	GO:BP	GO:0046483	heterocycle metabolic process	5892	5343	2221	0.415684	0.376952
2.1064442521583937e-56	GO:BP	GO:0016071	mRNA metabolic process	872	5343	484	0.090586	0.555046
1.1885635696101214e-54	GO:BP	GO:0071840	cellular component organization or biogenesis	6686	5343	2461	0.460603	0.368083
9.383116169511092e-54	GO:BP	GO:0006139	nucleobase-containing compound metabolic process	5713	5343	2153	0.402957	0.37686
8.083556698983349e-52	GO:BP	GO:0044260	cellular macromolecule metabolic process	8467	5343	2989	0.559424	0.353018
1.04871466103208e-49	GO:BP	GO:0051641	cellular localization	3487	5343	1413	0.264458	0.405219
1.7329458763053473e-49	GO:BP	GO:0016032	viral process	927	5343	492	0.092083	0.530744
5.800853472964373e-49	GO:BP	GO:0033554	cellular response to stress	2124	5343	940	0.175931	0.442561
4.48970718353667e-48	GO:BP	GO:0043436	oxoacid metabolic process	1184	5343	590	0.110425	0.498311
4.6907695975206865e-48	GO:BP	GO:0016043	cellular component organization	6499	5343	2374	0.44432	0.365287
7.032469739839511e-48	GO:BP	GO:0044403	symbiotic process	986	5343	512	0.095826	0.51927
1.469228612060086e-47	GO:BP	GO:0019752	carboxylic acid metabolic process	1092	5343	553	0.1035	0.50641
5.425038528762253e-47	GO:BP	GO:0006082	organic acid metabolic process	1204	5343	595	0.111361	0.494186
2.7536866806495188e-45	GO:BP	GO:0044271	cellular nitrogen compound biosynthetic process	4963	5343	1878	0.351488	0.3784
3.7822231059620137e-45	GO:BP	GO:0051276	chromosome organization	1253	5343	609	0.113981	0.486034
4.734501224705369e-45	GO:BP	GO:0007049	cell cycle	1882	5343	841	0.157402	0.446865
8.888693455350381e-45	GO:BP	GO:0009057	macromolecule catabolic process	1455	5343	684	0.128018	0.470103
1.864732302838919e-44	GO:BP	GO:0044265	cellular macromolecule catabolic process	1221	5343	595	0.111361	0.487305
2.6728768740025507e-44	GO:BP	GO:0043170	macromolecule metabolic process	9868	5343	3366	0.629983	0.341103
2.467036637051892e-43	GO:BP	GO:0046907	intracellular transport	1761	5343	792	0.148231	0.449744
6.772482165824224e-43	GO:BP	GO:0034613	cellular protein localization	1985	5343	871	0.163017	0.438791
1.2895450755117633e-42	GO:BP	GO:0070727	cellular macromolecule localization	1996	5343	874	0.163579	0.437876
1.4253336307662135e-42	GO:BP	GO:1901135	carbohydrate derivative metabolic process	1137	5343	558	0.104436	0.490765
6.515582537075503e-42	GO:BP	GO:0051649	establishment of localization in cell	2779	5343	1144	0.214112	0.411659
1.6867664208042385e-41	GO:BP	GO:0043603	cellular amide metabolic process	1210	5343	583	0.109115	0.481818
3.9849578831483254e-41	GO:BP	GO:0019637	organophosphate metabolic process	1066	5343	527	0.098634	0.494371
2.7272967632238542e-39	GO:BP	GO:0044085	cellular component biogenesis	3230	5343	1286	0.240689	0.398142
5.5343247132446264e-39	GO:BP	GO:0044255	cellular lipid metabolic process	1104	5343	536	0.100318	0.485507
2.244075219266497e-38	GO:BP	GO:1901361	organic cyclic compound catabolic process	659	5343	359	0.067191	0.544765
5.839537148588022e-38	GO:BP	GO:0043604	amide biosynthetic process	924	5343	464	0.086843	0.502165
1.6787014791148473e-37	GO:BP	GO:0006396	RNA processing	963	5343	478	0.089463	0.496366
3.3549855216372577e-37	GO:BP	GO:0006629	lipid metabolic process	1450	5343	660	0.123526	0.455172
5.3857282593316855e-37	GO:BP	GO:0008104	protein localization	2856	5343	1151	0.215422	0.403011
1.0795040843824467e-36	GO:BP	GO:0006886	intracellular protein transport	1184	5343	560	0.10481	0.472973
1.4229164740867712e-36	GO:BP	GO:0033036	macromolecule localization	3246	5343	1280	0.239566	0.394331
1.6978764890337782e-36	GO:BP	GO:0034655	nucleobase-containing compound catabolic process	560	5343	314	0.058768	0.560714
2.769080550501296e-36	GO:BP	GO:0019439	aromatic compound catabolic process	626	5343	341	0.063822	0.544728
3.6621640916092585e-36	GO:BP	GO:0044283	small molecule biosynthetic process	725	5343	381	0.071308	0.525517
3.9134938305511805e-36	GO:BP	GO:0051726	regulation of cell cycle	1223	5343	573	0.107243	0.46852
4.706681275028524e-36	GO:BP	GO:0043933	protein-containing complex subunit organization	1960	5343	839	0.157028	0.428061
5.332188258563947e-36	GO:BP	GO:0033365	protein localization to organelle	973	5343	478	0.089463	0.491264
5.451201488578813e-36	GO:BP	GO:1901565	organonitrogen compound catabolic process	1351	5343	620	0.11604	0.458919
8.521514937275606e-36	GO:BP	GO:0090407	organophosphate biosynthetic process	597	5343	328	0.061389	0.549414
1.0050242006468347e-35	GO:BP	GO:0000278	mitotic cell cycle	1056	5343	509	0.095265	0.482008
2.440372478526328e-35	GO:BP	GO:0044270	cellular nitrogen compound catabolic process	609	5343	332	0.062137	0.545156
4.0132660667826136e-34	GO:BP	GO:0046700	heterocycle catabolic process	608	5343	329	0.061576	0.541118
6.1235918190401285e-34	GO:BP	GO:0009059	macromolecule biosynthetic process	5125	5343	1876	0.351114	0.366049
3.967116280797509e-33	GO:BP	GO:0055086	nucleobase-containing small molecule metabolic process	628	5343	335	0.062699	0.533439
5.924052404618357e-33	GO:BP	GO:0010033	response to organic substance	3433	5343	1326	0.248175	0.386251
8.81860474889292e-33	GO:BP	GO:0070647	protein modification by small protein conjugation or removal	1174	5343	545	0.102003	0.464225
9.881584524738281e-33	GO:BP	GO:0008380	RNA splicing	457	5343	263	0.049223	0.575492
1.0882514519060789e-32	GO:BP	GO:0034645	cellular macromolecule biosynthetic process	4984	5343	1825	0.341568	0.366172
1.5987663297438755e-31	GO:BP	GO:0000375	RNA splicing, via transesterification reactions	361	5343	219	0.040988	0.606648
1.901493895372201e-31	GO:BP	GO:0045184	establishment of protein localization	2138	5343	884	0.16545	0.413471
1.9805640528488327e-31	GO:BP	GO:1903047	mitotic cell cycle process	908	5343	441	0.082538	0.485683
3.6704958860764248e-31	GO:BP	GO:0016310	phosphorylation	2501	5343	1007	0.188471	0.402639
3.8880173970139494e-31	GO:BP	GO:0000377	RNA splicing, via transesterification reactions with bulged adenosine as nucleophile	358	5343	217	0.040614	0.606145
3.8880173970139494e-31	GO:BP	GO:0000398	mRNA splicing, via spliceosome	358	5343	217	0.040614	0.606145
8.452795054872263e-31	GO:BP	GO:0022402	cell cycle process	1415	5343	627	0.11735	0.44311
1.0073206276941456e-30	GO:BP	GO:0022607	cellular component assembly	2989	5343	1169	0.218791	0.391101
1.474657323984301e-30	GO:BP	GO:1901137	carbohydrate derivative biosynthetic process	680	5343	350	0.065506	0.514706
1.945566849877932e-30	GO:BP	GO:0008610	lipid biosynthetic process	739	5343	373	0.069811	0.504736
4.279540866741203e-30	GO:BP	GO:0032446	protein modification by small protein conjugation	965	5343	459	0.085907	0.475648
5.205796722381176e-30	GO:BP	GO:0016567	protein ubiquitination	884	5343	428	0.080105	0.484163
6.530413183962756e-30	GO:BP	GO:0048519	negative regulation of biological process	5719	5343	2041	0.381995	0.356881
2.249761814406851e-29	GO:BP	GO:0006397	mRNA processing	533	5343	288	0.053902	0.540338
2.901317233453803e-29	GO:BP	GO:0015031	protein transport	2041	5343	842	0.157589	0.412543
3.801572821070733e-29	GO:BP	GO:0032787	monocarboxylic acid metabolic process	681	5343	347	0.064945	0.509545
4.6605030862685106e-29	GO:BP	GO:0090304	nucleic acid metabolic process	5194	5343	1872	0.350365	0.360416
3.2788462070561113e-28	GO:BP	GO:0009894	regulation of catabolic process	1041	5343	482	0.090211	0.463016
5.7435103137191685e-28	GO:BP	GO:0006401	RNA catabolic process	420	5343	238	0.044544	0.566667
6.249851511806219e-28	GO:BP	GO:0006511	ubiquitin-dependent protein catabolic process	648	5343	331	0.06195	0.510802
6.595750444497701e-28	GO:BP	GO:0072594	establishment of protein localization to organelle	573	5343	301	0.056335	0.525305
1.2738102994060526e-27	GO:BP	GO:0055114	oxidation-reduction process	1035	5343	478	0.089463	0.461836
1.3945293429887836e-27	GO:BP	GO:0009987	cellular process	17079	5343	5212	0.975482	0.30517
2.0918170711647733e-27	GO:BP	GO:0015833	peptide transport	2083	5343	849	0.158899	0.407585
2.9059080311722284e-27	GO:BP	GO:0006402	mRNA catabolic process	381	5343	220	0.041175	0.577428
8.337985829766717e-27	GO:BP	GO:0019941	modification-dependent protein catabolic process	655	5343	331	0.06195	0.505344
1.744272545849124e-26	GO:BP	GO:0009893	positive regulation of metabolic process	3970	5343	1469	0.274939	0.370025
1.8277701654612322e-26	GO:BP	GO:0031329	regulation of cellular catabolic process	881	5343	417	0.078046	0.473326
2.1523097858199533e-26	GO:BP	GO:0033043	regulation of organelle organization	1320	5343	578	0.108179	0.437879
2.792617935964193e-26	GO:BP	GO:0043632	modification-dependent macromolecule catabolic process	666	5343	334	0.062512	0.501502
3.2332694943435546e-26	GO:BP	GO:0010564	regulation of cell cycle process	788	5343	381	0.071308	0.483503
8.333583408810096e-26	GO:BP	GO:0043161	proteasome-mediated ubiquitin-dependent protein catabolic process	428	5343	237	0.044357	0.553738
8.334640450968107e-26	GO:BP	GO:0042886	amide transport	2120	5343	855	0.160022	0.403302
9.900958844476689e-26	GO:BP	GO:0031325	positive regulation of cellular metabolic process	3472	5343	1304	0.244058	0.375576
1.3872911232086046e-25	GO:BP	GO:0070887	cellular response to chemical stimulus	3419	5343	1286	0.240689	0.376133
1.5120441500513923e-25	GO:BP	GO:0048522	positive regulation of cellular process	5803	5343	2042	0.382182	0.351887
1.7789394095908266e-25	GO:BP	GO:1901362	organic cyclic compound biosynthetic process	4406	5343	1603	0.300019	0.363822
2.633291546191059e-25	GO:BP	GO:0006518	peptide metabolic process	922	5343	429	0.080292	0.465293
3.129199311483741e-25	GO:BP	GO:0000184	nuclear-transcribed mRNA catabolic process, nonsense-mediated decay	123	5343	96	0.017967	0.780488
1.0628750858998629e-24	GO:BP	GO:0043043	peptide biosynthetic process	778	5343	373	0.069811	0.479434
1.674962477508869e-24	GO:BP	GO:0044772	mitotic cell cycle phase transition	606	5343	306	0.057271	0.50495
1.7892010880534033e-24	GO:BP	GO:0022613	ribonucleoprotein complex biogenesis	442	5343	240	0.044919	0.542986
1.8100492947467144e-24	GO:BP	GO:0048523	negative regulation of cellular process	5086	5343	1812	0.339135	0.356272
2.064808566096838e-24	GO:BP	GO:0006631	fatty acid metabolic process	399	5343	222	0.04155	0.556391
2.0899517985790112e-24	GO:BP	GO:0006753	nucleoside phosphate metabolic process	546	5343	282	0.052779	0.516484
3.1769354409663836e-24	GO:BP	GO:0009892	negative regulation of metabolic process	3456	5343	1291	0.241625	0.373553
4.400279381321949e-24	GO:BP	GO:0051246	regulation of protein metabolic process	2917	5343	1114	0.208497	0.381899
7.292524183562959e-24	GO:BP	GO:0010605	negative regulation of macromolecule metabolic process	3213	5343	1210	0.226465	0.376595
9.068022881702433e-24	GO:BP	GO:0051173	positive regulation of nitrogen compound metabolic process	3285	5343	1233	0.230769	0.375342
1.1299443771307399e-23	GO:BP	GO:0006412	translation	754	5343	361	0.067565	0.47878
1.1964828192672411e-23	GO:BP	GO:0009117	nucleotide metabolic process	538	5343	277	0.051844	0.51487
1.4801280657685748e-23	GO:BP	GO:0006325	chromatin organization	821	5343	386	0.072244	0.470158
1.9197109409172362e-23	GO:BP	GO:0032268	regulation of cellular protein metabolic process	2763	5343	1060	0.19839	0.383641
5.347561261486978e-23	GO:BP	GO:0016070	RNA metabolic process	4694	5343	1680	0.31443	0.357904
5.716764052671595e-23	GO:BP	GO:0007346	regulation of mitotic cell cycle	665	5343	325	0.060827	0.488722
5.726559749622545e-23	GO:BP	GO:0048518	positive regulation of biological process	6416	5343	2215	0.414561	0.345231
9.579587634744035e-23	GO:BP	GO:0044770	cell cycle phase transition	651	5343	319	0.059704	0.490015
1.3642169983868162e-22	GO:BP	GO:0019438	aromatic compound biosynthetic process	4250	5343	1537	0.287666	0.361647
1.8154105877932634e-22	GO:BP	GO:0065003	protein-containing complex assembly	1677	5343	689	0.128954	0.410853
1.8880205799057643e-22	GO:BP	GO:0018130	heterocycle biosynthetic process	4240	5343	1533	0.286917	0.361557
1.9489437144830309e-22	GO:BP	GO:0000956	nuclear-transcribed mRNA catabolic process	213	5343	137	0.025641	0.643192
2.0244157130971582e-22	GO:BP	GO:0006974	cellular response to DNA damage stimulus	881	5343	405	0.0758	0.459705
2.479317186966389e-22	GO:BP	GO:0010604	positive regulation of macromolecule metabolic process	3667	5343	1349	0.25248	0.367876
2.671285307084774e-22	GO:BP	GO:0016569	covalent chromatin modification	481	5343	251	0.046977	0.52183
4.851609905853333e-22	GO:BP	GO:0035556	intracellular signal transduction	2854	5343	1083	0.202695	0.379467
5.711715054796037e-22	GO:BP	GO:0016570	histone modification	468	5343	245	0.045854	0.523504
6.40717659994544e-22	GO:BP	GO:0006950	response to stress	4190	5343	1514	0.283361	0.361337
8.372499054408375e-22	GO:BP	GO:0030163	protein catabolic process	965	5343	434	0.081228	0.449741
9.7694653243795e-22	GO:BP	GO:0051169	nuclear transport	362	5343	201	0.037619	0.555249
1.2914228218315124e-21	GO:BP	GO:0044257	cellular protein catabolic process	807	5343	375	0.070185	0.464684
1.5513479552779846e-21	GO:BP	GO:0010498	proteasomal protein catabolic process	488	5343	252	0.047165	0.516393
2.239101924397141e-21	GO:BP	GO:0006913	nucleocytoplasmic transport	359	5343	199	0.037245	0.554318
3.078173243510764e-21	GO:BP	GO:0051603	proteolysis involved in cellular protein catabolic process	746	5343	351	0.065693	0.470509
1.2808337088343419e-20	GO:BP	GO:0005975	carbohydrate metabolic process	640	5343	309	0.057833	0.482812
1.446003655922766e-20	GO:BP	GO:0031323	regulation of cellular metabolic process	6399	5343	2194	0.410631	0.342866
1.8152469463732998e-20	GO:BP	GO:0019693	ribose phosphate metabolic process	432	5343	227	0.042485	0.525463
2.1245565973498274e-20	GO:BP	GO:1901293	nucleoside phosphate biosynthetic process	272	5343	160	0.029946	0.588235
2.2226918870803977e-20	GO:BP	GO:0031324	negative regulation of cellular metabolic process	2728	5343	1033	0.193337	0.378666
2.9917633460280474e-20	GO:BP	GO:0071310	cellular response to organic substance	2797	5343	1055	0.197455	0.37719
3.719940966866831e-20	GO:BP	GO:0051128	regulation of cellular component organization	2450	5343	940	0.175931	0.383673
6.307751824399757e-20	GO:BP	GO:0034654	nucleobase-containing compound biosynthetic process	4174	5343	1497	0.28018	0.358649
7.108983065428031e-20	GO:BP	GO:0072521	purine-containing compound metabolic process	478	5343	244	0.045667	0.51046
1.0162299953241066e-19	GO:BP	GO:0009165	nucleotide biosynthetic process	268	5343	157	0.029384	0.585821
1.0774199885624016e-19	GO:BP	GO:0010467	gene expression	6089	5343	2093	0.391727	0.343735
1.2787910627872612e-19	GO:BP	GO:0009259	ribonucleotide metabolic process	422	5343	221	0.041363	0.523697
2.381849913480286e-19	GO:BP	GO:1901698	response to nitrogen compound	1172	5343	500	0.09358	0.426621
2.865012908790775e-19	GO:BP	GO:0006163	purine nucleotide metabolic process	444	5343	229	0.04286	0.515766
3.040649497495657e-19	GO:BP	GO:0045786	negative regulation of cell cycle	637	5343	304	0.056897	0.477237
4.1969297197209176e-19	GO:BP	GO:1901990	regulation of mitotic cell cycle phase transition	445	5343	229	0.04286	0.514607
8.479980513139882e-19	GO:BP	GO:0019222	regulation of metabolic process	7248	5343	2440	0.456672	0.336645
8.6210641071425055e-19	GO:BP	GO:0044272	sulfur compound biosynthetic process	193	5343	122	0.022834	0.632124
1.25273995206139e-18	GO:BP	GO:0010629	negative regulation of gene expression	2404	5343	917	0.171626	0.381448
1.2807252397557112e-18	GO:BP	GO:1903311	regulation of mRNA metabolic process	349	5343	189	0.035373	0.541547
1.329304698327837e-18	GO:BP	GO:0010243	response to organonitrogen compound	1087	5343	467	0.087404	0.429623
1.6724835109622859e-18	GO:BP	GO:0051172	negative regulation of nitrogen compound metabolic process	2524	5343	956	0.178926	0.378764
2.160261355585801e-18	GO:BP	GO:0044419	interspecies interaction between organisms	2254	5343	866	0.162081	0.384206
2.20756596701254e-18	GO:BP	GO:0033044	regulation of chromosome organization	360	5343	193	0.036122	0.536111
2.2887134860809853e-18	GO:BP	GO:0009719	response to endogenous stimulus	1696	5343	678	0.126895	0.399764
2.9260980373756003e-18	GO:BP	GO:0071705	nitrogen compound transport	2440	5343	927	0.173498	0.379918
7.727540576440501e-18	GO:BP	GO:1902531	regulation of intracellular signal transduction	1883	5343	739	0.138312	0.392459
9.529215974325599e-18	GO:BP	GO:1901987	regulation of cell cycle phase transition	484	5343	241	0.045106	0.497934
9.605462656695767e-18	GO:BP	GO:0006413	translational initiation	199	5343	123	0.023021	0.61809
1.0981980104220507e-17	GO:BP	GO:0046390	ribose phosphate biosynthetic process	197	5343	122	0.022834	0.619289
1.1996835956868365e-17	GO:BP	GO:0080090	regulation of primary metabolic process	6191	5343	2110	0.394909	0.340817
2.3450588378531125e-17	GO:BP	GO:0006403	RNA localization	239	5343	140	0.026203	0.585774
2.915369941002065e-17	GO:BP	GO:0009966	regulation of signal transduction	3236	5343	1181	0.221037	0.364957
4.0569784363179265e-17	GO:BP	GO:0072331	signal transduction by p53 class mediator	268	5343	152	0.028448	0.567164
4.2372275961748045e-17	GO:BP	GO:0009150	purine ribonucleotide metabolic process	407	5343	209	0.039117	0.513514
5.491828942008606e-17	GO:BP	GO:0009725	response to hormone	933	5343	406	0.075987	0.435155
8.269560845412152e-17	GO:BP	GO:0012501	programmed cell death	2158	5343	826	0.154595	0.382762
1.0206289547638542e-16	GO:BP	GO:0023051	regulation of signaling	3699	5343	1326	0.248175	0.358475
1.1346043883400702e-16	GO:BP	GO:0000209	protein polyubiquitination	340	5343	181	0.033876	0.532353
1.221766297678177e-16	GO:BP	GO:0031399	regulation of protein modification process	1927	5343	748	0.139996	0.388168
1.2392932823072755e-16	GO:BP	GO:0045935	positive regulation of nucleobase-containing compound metabolic process	1942	5343	753	0.140932	0.387745
1.3636766149518607e-16	GO:BP	GO:0009260	ribonucleotide biosynthetic process	190	5343	117	0.021898	0.615789
1.6726239418053836e-16	GO:BP	GO:0044282	small molecule catabolic process	459	5343	228	0.042673	0.496732
2.0464145501053464e-16	GO:BP	GO:0008219	cell death	2300	5343	871	0.163017	0.378696
3.200182597155334e-16	GO:BP	GO:0080135	regulation of cellular response to stress	783	5343	349	0.065319	0.445722
3.32712546592854e-16	GO:BP	GO:0009123	nucleoside monophosphate metabolic process	71	5343	58	0.010855	0.816901
3.4377356253813074e-16	GO:BP	GO:1901568	fatty acid derivative metabolic process	176	5343	110	0.020588	0.625
4.4389995863318645e-16	GO:BP	GO:0051247	positive regulation of protein metabolic process	1742	5343	683	0.127831	0.392078
4.740244360156825e-16	GO:BP	GO:0010646	regulation of cell communication	3659	5343	1309	0.244993	0.357748
5.166791678886857e-16	GO:BP	GO:0006790	sulfur compound metabolic process	376	5343	194	0.036309	0.515957
5.828461164132984e-16	GO:BP	GO:0045934	negative regulation of nucleobase-containing compound metabolic process	1514	5343	605	0.113232	0.399604
6.080110580807025e-16	GO:BP	GO:0051301	cell division	623	5343	289	0.054089	0.463884
8.598312103600477e-16	GO:BP	GO:1901700	response to oxygen-containing compound	1755	5343	686	0.128392	0.390883
9.994284620477962e-16	GO:BP	GO:0051253	negative regulation of RNA metabolic process	1412	5343	569	0.106494	0.402975
1.0698262119303306e-15	GO:BP	GO:0006915	apoptotic process	2013	5343	772	0.144488	0.383507
1.227940701291178e-15	GO:BP	GO:1903320	regulation of protein modification by small protein conjugation or removal	242	5343	138	0.025828	0.570248
1.2769461498880154e-15	GO:BP	GO:0060255	regulation of macromolecule metabolic process	6709	5343	2253	0.421673	0.335818
1.3809616427492735e-15	GO:BP	GO:0051171	regulation of nitrogen compound metabolic process	5999	5343	2036	0.381059	0.33939
1.4793998050851116e-15	GO:BP	GO:0006259	DNA metabolic process	956	5343	409	0.076549	0.427824
1.6549794621228135e-15	GO:BP	GO:0031328	positive regulation of cellular biosynthetic process	2052	5343	784	0.146734	0.382066
2.172323275230903e-15	GO:BP	GO:0010638	positive regulation of organelle organization	641	5343	294	0.055025	0.458658
2.388553800886303e-15	GO:BP	GO:0046394	carboxylic acid biosynthetic process	365	5343	188	0.035186	0.515068
3.4893779322426967e-15	GO:BP	GO:0016053	organic acid biosynthetic process	366	5343	188	0.035186	0.513661
4.316131785910121e-15	GO:BP	GO:1901652	response to peptide	550	5343	259	0.048475	0.470909
4.641210861153562e-15	GO:BP	GO:0019083	viral transcription	178	5343	109	0.020401	0.61236
6.023884619253251e-15	GO:BP	GO:0045047	protein targeting to ER	110	5343	77	0.014411	0.7
6.084877691611925e-15	GO:BP	GO:1901653	cellular response to peptide	408	5343	204	0.038181	0.5
7.98581358874188e-15	GO:BP	GO:0009891	positive regulation of biosynthetic process	2087	5343	792	0.148231	0.379492
8.51839162314859e-15	GO:BP	GO:0010557	positive regulation of macromolecule biosynthetic process	1940	5343	743	0.13906	0.38299
8.91417204841002e-15	GO:BP	GO:0006644	phospholipid metabolic process	458	5343	223	0.041737	0.4869
9.939144470378482e-15	GO:BP	GO:0034622	cellular protein-containing complex assembly	1104	5343	458	0.08572	0.414855
1.0003359134103974e-14	GO:BP	GO:0071495	cellular response to endogenous stimulus	1431	5343	571	0.106869	0.399022
1.0285246555939509e-14	GO:BP	GO:0032270	positive regulation of cellular protein metabolic process	1652	5343	646	0.120906	0.391041
1.6889987769024597e-14	GO:BP	GO:0006468	protein phosphorylation	2044	5343	776	0.145237	0.379648
3.299512412458758e-14	GO:BP	GO:0019080	viral gene expression	195	5343	115	0.021523	0.589744
3.4839936662927666e-14	GO:BP	GO:0008654	phospholipid biosynthetic process	273	5343	148	0.0277	0.542125
3.599821023526142e-14	GO:BP	GO:0006614	SRP-dependent cotranslational protein targeting to membrane	96	5343	69	0.012914	0.71875
5.770071528888123e-14	GO:BP	GO:0042254	ribosome biogenesis	306	5343	161	0.030133	0.526144
7.807400307135703e-14	GO:BP	GO:0070125	mitochondrial translational elongation	87	5343	64	0.011978	0.735632
8.347535454778357e-14	GO:BP	GO:0043687	post-translational protein modification	362	5343	183	0.03425	0.505525
8.73623595608353e-14	GO:BP	GO:0006613	cotranslational protein targeting to membrane	101	5343	71	0.013288	0.70297
9.97871850020404e-14	GO:BP	GO:0051236	establishment of RNA localization	204	5343	118	0.022085	0.578431
1.1779588565999349e-13	GO:BP	GO:0071826	ribonucleoprotein complex subunit organization	202	5343	117	0.021898	0.579208
1.1924127112947334e-13	GO:BP	GO:0072522	purine-containing compound biosynthetic process	209	5343	120	0.022459	0.574163
1.2314086918935078e-13	GO:BP	GO:0014070	response to organic cyclic compound	977	5343	409	0.076549	0.418628
1.2351444798756708e-13	GO:BP	GO:0006605	protein targeting	435	5343	211	0.039491	0.485057
1.3316784116725228e-13	GO:BP	GO:0009152	purine ribonucleotide biosynthetic process	177	5343	106	0.019839	0.59887
1.5508993329648672e-13	GO:BP	GO:0072599	establishment of protein localization to endoplasmic reticulum	114	5343	77	0.014411	0.675439
1.6389084855473827e-13	GO:BP	GO:0006164	purine nucleotide biosynthetic process	198	5343	115	0.021523	0.580808
1.7754227450276125e-13	GO:BP	GO:0046474	glycerophospholipid biosynthetic process	231	5343	129	0.024144	0.558442
2.0744982527993133e-13	GO:BP	GO:0032870	cellular response to hormone stimulus	653	5343	292	0.054651	0.447167
2.1431901852199085e-13	GO:BP	GO:0006091	generation of precursor metabolites and energy	545	5343	252	0.047165	0.462385
2.2643606322394368e-13	GO:BP	GO:0006650	glycerophospholipid metabolic process	342	5343	174	0.032566	0.508772
2.333999292547179e-13	GO:BP	GO:0050658	RNA transport	201	5343	116	0.021711	0.577114
2.333999292547179e-13	GO:BP	GO:0050657	nucleic acid transport	201	5343	116	0.021711	0.577114
2.7817473286139536e-13	GO:BP	GO:0018193	peptidyl-amino acid modification	1313	5343	524	0.098072	0.399086
2.829647879955821e-13	GO:BP	GO:0046486	glycerolipid metabolic process	435	5343	210	0.039304	0.482759
3.016559090531861e-13	GO:BP	GO:0080134	regulation of response to stress	1546	5343	603	0.112858	0.390039
3.4853629212882256e-13	GO:BP	GO:0060341	regulation of cellular localization	1005	5343	417	0.078046	0.414925
3.6522831815313374e-13	GO:BP	GO:0051640	organelle localization	658	5343	293	0.054838	0.445289
3.842467458180548e-13	GO:BP	GO:0022618	ribonucleoprotein complex assembly	195	5343	113	0.021149	0.579487
4.076728401013623e-13	GO:BP	GO:0032984	protein-containing complex disassembly	331	5343	169	0.03163	0.510574
4.3448529809973734e-13	GO:BP	GO:0051338	regulation of transferase activity	1029	5343	425	0.079543	0.413022
4.672721787991248e-13	GO:BP	GO:0035335	peptidyl-tyrosine dephosphorylation	103	5343	71	0.013288	0.68932
5.324477481732556e-13	GO:BP	GO:0031396	regulation of protein ubiquitination	212	5343	120	0.022459	0.566038
6.451516085453703e-13	GO:BP	GO:0051168	nuclear export	203	5343	116	0.021711	0.571429
6.883649674545529e-13	GO:BP	GO:0071375	cellular response to peptide hormone stimulus	340	5343	172	0.032192	0.505882
8.12078606262032e-13	GO:BP	GO:0043434	response to peptide hormone	462	5343	219	0.040988	0.474026
9.866827947673172e-13	GO:BP	GO:0071702	organic substance transport	2870	5343	1035	0.193711	0.360627
1.0465617538209257e-12	GO:BP	GO:0006415	translational termination	104	5343	71	0.013288	0.682692
1.2612377922122914e-12	GO:BP	GO:0070126	mitochondrial translational termination	88	5343	63	0.011791	0.715909
1.376835826012598e-12	GO:BP	GO:0006281	DNA repair	568	5343	258	0.048287	0.454225
1.7106055780316165e-12	GO:BP	GO:0045017	glycerolipid biosynthetic process	270	5343	143	0.026764	0.52963
1.9207310852450162e-12	GO:BP	GO:0042176	regulation of protein catabolic process	402	5343	195	0.036496	0.485075
2.2637280434220544e-12	GO:BP	GO:0072657	protein localization to membrane	649	5343	287	0.053715	0.442219
2.616400083754716e-12	GO:BP	GO:1901699	cellular response to nitrogen compound	727	5343	315	0.058956	0.433287
2.7405608793990987e-12	GO:BP	GO:1903507	negative regulation of nucleic acid-templated transcription	1312	5343	519	0.097136	0.395579
2.854516038022891e-12	GO:BP	GO:0042221	response to chemical	4808	5343	1643	0.307505	0.341722
3.4522346620210984e-12	GO:BP	GO:0065009	regulation of molecular function	3084	5343	1100	0.205877	0.35668
3.461189769144275e-12	GO:BP	GO:2001252	positive regulation of chromosome organization	183	5343	106	0.019839	0.579235
3.509710743875982e-12	GO:BP	GO:0009124	nucleoside monophosphate biosynthetic process	43	5343	38	0.007112	0.883721
3.805123433484836e-12	GO:BP	GO:1902679	negative regulation of RNA biosynthetic process	1314	5343	519	0.097136	0.394977
4.327864561460588e-12	GO:BP	GO:0018205	peptidyl-lysine modification	415	5343	199	0.037245	0.479518
4.524003879264408e-12	GO:BP	GO:0006520	cellular amino acid metabolic process	353	5343	175	0.032753	0.495751
5.335492005827634e-12	GO:BP	GO:0009161	ribonucleoside monophosphate metabolic process	50	5343	42	0.007861	0.84
5.4183884209339244e-12	GO:BP	GO:1903827	regulation of cellular protein localization	557	5343	252	0.047165	0.452424
5.798899107363793e-12	GO:BP	GO:0006611	protein export from nucleus	184	5343	106	0.019839	0.576087
6.069166236908349e-12	GO:BP	GO:0010948	negative regulation of cell cycle process	359	5343	177	0.033127	0.493036
8.315564212444222e-12	GO:BP	GO:0045787	positive regulation of cell cycle	391	5343	189	0.035373	0.483376
8.68548174963206e-12	GO:BP	GO:0032543	mitochondrial translation	137	5343	85	0.015909	0.620438
8.693556770565973e-12	GO:BP	GO:0009628	response to abiotic stimulus	1275	5343	504	0.094329	0.395294
8.695920968532024e-12	GO:BP	GO:0090150	establishment of protein localization to membrane	337	5343	168	0.031443	0.498516
8.874392172254152e-12	GO:BP	GO:0009890	negative regulation of biosynthetic process	1712	5343	651	0.121842	0.380257
8.98440846191611e-12	GO:BP	GO:0097190	apoptotic signaling pathway	619	5343	274	0.051282	0.442649
1.0416248818019817e-11	GO:BP	GO:0071417	cellular response to organonitrogen compound	672	5343	293	0.054838	0.436012
1.1121328522498514e-11	GO:BP	GO:0065008	regulation of biological quality	4133	5343	1428	0.267266	0.345512
1.1828300003585599e-11	GO:BP	GO:0031327	negative regulation of cellular biosynthetic process	1681	5343	640	0.119783	0.380726
1.2200497444330506e-11	GO:BP	GO:0070972	protein localization to endoplasmic reticulum	142	5343	87	0.016283	0.612676
1.2511656723698051e-11	GO:BP	GO:0000122	negative regulation of transcription by RNA polymerase II	875	5343	365	0.068314	0.417143
1.3299212258116805e-11	GO:BP	GO:0006633	fatty acid biosynthetic process	174	5343	101	0.018903	0.58046
1.5073692226099918e-11	GO:BP	GO:0051254	positive regulation of RNA metabolic process	1773	5343	670	0.125398	0.377891
1.518525225297829e-11	GO:BP	GO:0005996	monosaccharide metabolic process	298	5343	152	0.028448	0.510067
1.5443390495538672e-11	GO:BP	GO:0034504	protein localization to nucleus	283	5343	146	0.027325	0.515901
1.8801526707288455e-11	GO:BP	GO:0051028	mRNA transport	154	5343	92	0.017219	0.597403
2.731641089892849e-11	GO:BP	GO:0009156	ribonucleoside monophosphate biosynthetic process	33	5343	31	0.005802	0.939394
2.7674579529892443e-11	GO:BP	GO:0010558	negative regulation of macromolecule biosynthetic process	1615	5343	616	0.115291	0.381424
2.950717339562153e-11	GO:BP	GO:0006366	transcription by RNA polymerase II	2330	5343	851	0.159274	0.365236
3.673024335001144e-11	GO:BP	GO:0042981	regulation of apoptotic process	1608	5343	613	0.11473	0.381219
3.754833105187099e-11	GO:BP	GO:0006979	response to oxidative stress	470	5343	217	0.040614	0.461702
3.956249373794453e-11	GO:BP	GO:0010941	regulation of cell death	1765	5343	665	0.124462	0.376771
3.993771140398348e-11	GO:BP	GO:0044839	cell cycle G2/M phase transition	278	5343	143	0.026764	0.514388
4.1738100622598e-11	GO:BP	GO:0045892	negative regulation of transcription, DNA-templated	1270	5343	499	0.093393	0.392913
4.3329347780190846e-11	GO:BP	GO:0031145	anaphase-promoting complex-dependent catabolic process	84	5343	59	0.011042	0.702381
4.3638773361835864e-11	GO:BP	GO:0019219	regulation of nucleobase-containing compound metabolic process	4087	5343	1409	0.26371	0.344752
4.8557414359184044e-11	GO:BP	GO:0043484	regulation of RNA splicing	158	5343	93	0.017406	0.588608
4.8591318051525993e-11	GO:BP	GO:0007010	cytoskeleton organization	1407	5343	545	0.102003	0.387349
4.864573588650233e-11	GO:BP	GO:0043067	regulation of programmed cell death	1634	5343	621	0.116227	0.380049
5.3138798532570325e-11	GO:BP	GO:0006414	translational elongation	140	5343	85	0.015909	0.607143
5.68988151891856e-11	GO:BP	GO:0050684	regulation of mRNA processing	156	5343	92	0.017219	0.589744
6.781097602097486e-11	GO:BP	GO:0022411	cellular component disassembly	567	5343	252	0.047165	0.444444
7.17767620559003e-11	GO:BP	GO:0044093	positive regulation of molecular function	1833	5343	686	0.128392	0.37425
8.474314120359136e-11	GO:BP	GO:0000086	G2/M transition of mitotic cell cycle	260	5343	135	0.025267	0.519231
1.0730726829761248e-10	GO:BP	GO:1901657	glycosyl compound metabolic process	130	5343	80	0.014973	0.615385
1.1310521694568061e-10	GO:BP	GO:2000113	negative regulation of cellular macromolecule biosynthetic process	1550	5343	591	0.110612	0.38129
1.1916374648167648e-10	GO:BP	GO:1901570	fatty acid derivative biosynthetic process	104	5343	68	0.012727	0.653846
1.385084441205717e-10	GO:BP	GO:1901796	regulation of signal transduction by p53 class mediator	181	5343	102	0.01909	0.563536
1.407222732346013e-10	GO:BP	GO:1901615	organic hydroxy compound metabolic process	570	5343	252	0.047165	0.442105
1.747620252293645e-10	GO:BP	GO:0051130	positive regulation of cellular component organization	1226	5343	481	0.090024	0.392333
1.9820125335839897e-10	GO:BP	GO:0032386	regulation of intracellular transport	362	5343	174	0.032566	0.480663
1.982072527464684e-10	GO:BP	GO:0097193	intrinsic apoptotic signaling pathway	295	5343	148	0.0277	0.501695
1.9882814521230576e-10	GO:BP	GO:0050790	regulation of catalytic activity	2402	5343	869	0.162643	0.361782
2.0428894020622748e-10	GO:BP	GO:0016311	dephosphorylation	506	5343	228	0.042673	0.450593
2.3710921975689566e-10	GO:BP	GO:2000058	regulation of ubiquitin-dependent protein catabolic process	161	5343	93	0.017406	0.57764
2.525705394215788e-10	GO:BP	GO:0000082	G1/S transition of mitotic cell cycle	283	5343	143	0.026764	0.5053
2.647095294878927e-10	GO:BP	GO:0042180	cellular ketone metabolic process	268	5343	137	0.025641	0.511194
3.327630646907962e-10	GO:BP	GO:1902749	regulation of cell cycle G2/M phase transition	219	5343	117	0.021898	0.534247
3.6838656562236863e-10	GO:BP	GO:0044843	cell cycle G1/S phase transition	307	5343	152	0.028448	0.495114
4.1115449202658487e-10	GO:BP	GO:0070925	organelle assembly	876	5343	359	0.067191	0.409817
4.156772712706177e-10	GO:BP	GO:0048732	gland development	452	5343	207	0.038742	0.457965
4.188845919017671e-10	GO:BP	GO:0006364	rRNA processing	222	5343	118	0.022085	0.531532
4.47397186804248e-10	GO:BP	GO:0016072	rRNA metabolic process	232	5343	122	0.022834	0.525862
4.919312296459223e-10	GO:BP	GO:0006066	alcohol metabolic process	386	5343	182	0.034063	0.471503
5.04785336980112e-10	GO:BP	GO:0000075	cell cycle checkpoint	220	5343	117	0.021898	0.531818
5.111553546997737e-10	GO:BP	GO:0046434	organophosphate catabolic process	144	5343	85	0.015909	0.590278
5.325747580128222e-10	GO:BP	GO:0009896	positive regulation of catabolic process	461	5343	210	0.039304	0.455531
6.192490654328526e-10	GO:BP	GO:0010506	regulation of autophagy	350	5343	168	0.031443	0.48
6.404027323257624e-10	GO:BP	GO:0140014	mitotic nuclear division	278	5343	140	0.026203	0.503597
6.542135385725126e-10	GO:BP	GO:0006665	sphingolipid metabolic process	163	5343	93	0.017406	0.570552
6.973813372570339e-10	GO:BP	GO:0198738	cell-cell signaling by wnt	530	5343	235	0.043983	0.443396
8.552760814137523e-10	GO:BP	GO:0031647	regulation of protein stability	289	5343	144	0.026951	0.49827
8.782489554063963e-10	GO:BP	GO:0035384	thioester biosynthetic process	54	5343	42	0.007861	0.777778
8.782489554063963e-10	GO:BP	GO:0071616	acyl-CoA biosynthetic process	54	5343	42	0.007861	0.777778
9.690456821040957e-10	GO:BP	GO:0045930	negative regulation of mitotic cell cycle	341	5343	164	0.030694	0.480938
1.005436763669044e-09	GO:BP	GO:0006914	autophagy	537	5343	237	0.044357	0.441341
1.005436763669044e-09	GO:BP	GO:0061919	process utilizing autophagic mechanism	537	5343	237	0.044357	0.441341
1.0635533019503824e-09	GO:BP	GO:0006643	membrane lipid metabolic process	212	5343	113	0.021149	0.533019
1.0678086038571052e-09	GO:BP	GO:1903508	positive regulation of nucleic acid-templated transcription	1681	5343	629	0.117724	0.374182
1.131027578246148e-09	GO:BP	GO:1901701	cellular response to oxygen-containing compound	1241	5343	482	0.090211	0.388396
1.179318533024337e-09	GO:BP	GO:0009967	positive regulation of signal transduction	1706	5343	637	0.119221	0.373388
1.2160219664160936e-09	GO:BP	GO:1902680	positive regulation of RNA biosynthetic process	1682	5343	629	0.117724	0.37396
1.2171657332157096e-09	GO:BP	GO:0070646	protein modification by small protein removal	308	5343	151	0.028261	0.49026
1.2935764165337732e-09	GO:BP	GO:0071166	ribonucleoprotein complex localization	132	5343	79	0.014786	0.598485
1.3231094749284334e-09	GO:BP	GO:0023056	positive regulation of signaling	1920	5343	707	0.132323	0.368229
1.3734139383424327e-09	GO:BP	GO:0030258	lipid modification	270	5343	136	0.025454	0.503704
1.4338233953234366e-09	GO:BP	GO:0031331	positive regulation of cellular catabolic process	395	5343	184	0.034438	0.465823
1.4669272522294773e-09	GO:BP	GO:0006612	protein targeting to membrane	203	5343	109	0.020401	0.536946
1.4681147966953166e-09	GO:BP	GO:0140053	mitochondrial gene expression	167	5343	94	0.017593	0.562874
1.5162003029644144e-09	GO:BP	GO:0006260	DNA replication	283	5343	141	0.02639	0.498233
1.6172428535509447e-09	GO:BP	GO:0016055	Wnt signaling pathway	528	5343	233	0.043608	0.441288
1.756971075593051e-09	GO:BP	GO:0006405	RNA export from nucleus	144	5343	84	0.015722	0.583333
1.7852523568654816e-09	GO:BP	GO:0034404	nucleobase-containing small molecule biosynthetic process	108	5343	68	0.012727	0.62963
1.7903569002212926e-09	GO:BP	GO:0009968	negative regulation of signal transduction	1372	5343	525	0.098259	0.382653
1.8212330142041358e-09	GO:BP	GO:0010628	positive regulation of gene expression	2391	5343	859	0.160771	0.359264
1.9756617936398558e-09	GO:BP	GO:0051656	establishment of organelle localization	439	5343	200	0.037432	0.455581
2.3542788574003915e-09	GO:BP	GO:0042325	regulation of phosphorylation	1675	5343	625	0.116975	0.373134
2.4073159593195258e-09	GO:BP	GO:0051052	regulation of DNA metabolic process	365	5343	172	0.032192	0.471233
2.428356927577862e-09	GO:BP	GO:1903322	positive regulation of protein modification by small protein conjugation or removal	140	5343	82	0.015347	0.585714
2.642533597959041e-09	GO:BP	GO:0071426	ribonucleoprotein complex export from nucleus	131	5343	78	0.014599	0.59542
2.6873196239044146e-09	GO:BP	GO:0031503	protein-containing complex localization	277	5343	138	0.025828	0.498195
2.693868489155651e-09	GO:BP	GO:0010389	regulation of G2/M transition of mitotic cell cycle	202	5343	108	0.020213	0.534653
2.8052210426886232e-09	GO:BP	GO:0010647	positive regulation of cell communication	1914	5343	703	0.131574	0.367294
2.8311574734318227e-09	GO:BP	GO:0016236	macroautophagy	308	5343	150	0.028074	0.487013
2.848347472684703e-09	GO:BP	GO:0048513	animal organ development	3731	5343	1283	0.240127	0.343876
2.8592111461865936e-09	GO:BP	GO:0031401	positive regulation of protein modification process	1265	5343	488	0.091334	0.385771
2.9443957637856645e-09	GO:BP	GO:1903362	regulation of cellular protein catabolic process	262	5343	132	0.024705	0.503817
4.2437837069967895e-09	GO:BP	GO:0006357	regulation of transcription by RNA polymerase II	2182	5343	789	0.14767	0.361595
4.9786938230050834e-09	GO:BP	GO:0016042	lipid catabolic process	349	5343	165	0.030882	0.472779
5.1997735493040334e-09	GO:BP	GO:0006470	protein dephosphorylation	336	5343	160	0.029946	0.47619
5.399259288753876e-09	GO:BP	GO:0016051	carbohydrate biosynthetic process	216	5343	113	0.021149	0.523148
5.63491990207658e-09	GO:BP	GO:0019220	regulation of phosphate metabolic process	1877	5343	689	0.128954	0.367075
6.103660504684086e-09	GO:BP	GO:0046473	phosphatidic acid metabolic process	52	5343	40	0.007486	0.769231
6.16885788168354e-09	GO:BP	GO:0009889	regulation of biosynthetic process	4375	5343	1481	0.277185	0.338514
6.346963512343309e-09	GO:BP	GO:0051174	regulation of phosphorus metabolic process	1878	5343	689	0.128954	0.36688
6.9377987923814385e-09	GO:BP	GO:0048583	regulation of response to stimulus	4399	5343	1488	0.278495	0.338259
7.439675812284102e-09	GO:BP	GO:0051054	positive regulation of DNA metabolic process	202	5343	107	0.020026	0.529703
7.804043880532014e-09	GO:BP	GO:0072330	monocarboxylic acid biosynthetic process	247	5343	125	0.023395	0.506073
8.06128251925263e-09	GO:BP	GO:0062012	regulation of small molecule metabolic process	458	5343	205	0.038368	0.447598
8.345665219021524e-09	GO:BP	GO:0046034	ATP metabolic process	314	5343	151	0.028261	0.480892
8.781320149884391e-09	GO:BP	GO:0010468	regulation of gene expression	5121	5343	1710	0.320045	0.333919
8.851510406402715e-09	GO:BP	GO:0031326	regulation of cellular biosynthetic process	4286	5343	1452	0.271757	0.338777
1.1760725865178554e-08	GO:BP	GO:0042592	homeostatic process	2003	5343	728	0.136253	0.363455
1.2780999774614795e-08	GO:BP	GO:0019318	hexose metabolic process	256	5343	128	0.023957	0.5
1.383268312647205e-08	GO:BP	GO:0035966	response to topologically incorrect protein	206	5343	108	0.020213	0.524272
1.4703017570345643e-08	GO:BP	GO:0031570	DNA integrity checkpoint	160	5343	89	0.016657	0.55625
1.5192312507040994e-08	GO:BP	GO:0030148	sphingolipid biosynthetic process	107	5343	66	0.012353	0.616822
1.6788409411784567e-08	GO:BP	GO:0090068	positive regulation of cell cycle process	298	5343	144	0.026951	0.483221
1.6993981485275526e-08	GO:BP	GO:0044242	cellular lipid catabolic process	234	5343	119	0.022272	0.508547
1.7304528204059588e-08	GO:BP	GO:0043624	cellular protein complex disassembly	224	5343	115	0.021523	0.513393
1.9255465864524137e-08	GO:BP	GO:0009100	glycoprotein metabolic process	418	5343	189	0.035373	0.452153
2.428349982336536e-08	GO:BP	GO:0007059	chromosome segregation	328	5343	155	0.02901	0.472561
2.8501742045802145e-08	GO:BP	GO:0071897	DNA biosynthetic process	193	5343	102	0.01909	0.528497
3.006254686702817e-08	GO:BP	GO:1903050	regulation of proteolysis involved in cellular protein catabolic process	228	5343	116	0.021711	0.508772
3.359081958775658e-08	GO:BP	GO:0032868	response to insulin	295	5343	142	0.026577	0.481356
3.428073672288503e-08	GO:BP	GO:0045893	positive regulation of transcription, DNA-templated	1590	5343	590	0.110425	0.371069
3.523808114940815e-08	GO:BP	GO:0006690	icosanoid metabolic process	122	5343	72	0.013476	0.590164
3.5842330582950266e-08	GO:BP	GO:0016579	protein deubiquitination	290	5343	140	0.026203	0.482759
3.654694176271756e-08	GO:BP	GO:0034097	response to cytokine	1238	5343	473	0.088527	0.382068
3.669971596552469e-08	GO:BP	GO:0035383	thioester metabolic process	104	5343	64	0.011978	0.615385
3.669971596552469e-08	GO:BP	GO:0006637	acyl-CoA metabolic process	104	5343	64	0.011978	0.615385
3.794985928247177e-08	GO:BP	GO:0034976	response to endoplasmic reticulum stress	298	5343	143	0.026764	0.479866
4.147764589018138e-08	GO:BP	GO:0006654	phosphatidic acid biosynthetic process	50	5343	38	0.007112	0.76
4.531041793208914e-08	GO:BP	GO:0006283	transcription-coupled nucleotide-excision repair	72	5343	49	0.009171	0.680556
4.9681214689647154e-08	GO:BP	GO:0042493	response to drug	419	5343	188	0.035186	0.448687
5.102235447774233e-08	GO:BP	GO:0051129	negative regulation of cellular component organization	750	5343	306	0.057271	0.408
5.127247257568532e-08	GO:BP	GO:0032269	negative regulation of cellular protein metabolic process	1151	5343	443	0.082912	0.384883
5.6042033511061214e-08	GO:BP	GO:0000226	microtubule cytoskeleton organization	594	5343	251	0.046977	0.422559
5.7662150352909374e-08	GO:BP	GO:0000723	telomere maintenance	163	5343	89	0.016657	0.546012
5.791633818564228e-08	GO:BP	GO:0009116	nucleoside metabolic process	107	5343	65	0.012165	0.607477
5.96737245071979e-08	GO:BP	GO:0051252	regulation of RNA metabolic process	3821	5343	1300	0.243309	0.340225
6.045451546994518e-08	GO:BP	GO:0032869	cellular response to insulin stimulus	235	5343	118	0.022085	0.502128
6.140885011456311e-08	GO:BP	GO:0031400	negative regulation of protein modification process	651	5343	271	0.050721	0.416283
6.966606447626143e-08	GO:BP	GO:0043549	regulation of kinase activity	920	5343	364	0.068127	0.395652
7.009589070314929e-08	GO:BP	GO:0044262	cellular carbohydrate metabolic process	300	5343	143	0.026764	0.476667
7.036490668759421e-08	GO:BP	GO:0010833	telomere maintenance via telomere lengthening	81	5343	53	0.00992	0.654321
7.083225146947115e-08	GO:BP	GO:0006476	protein deacetylation	94	5343	59	0.011042	0.62766
7.65512612504419e-08	GO:BP	GO:0001676	long-chain fatty acid metabolic process	112	5343	67	0.01254	0.598214
7.664649700163726e-08	GO:BP	GO:1901991	negative regulation of mitotic cell cycle phase transition	251	5343	124	0.023208	0.494024
8.329183263771165e-08	GO:BP	GO:2000736	regulation of stem cell differentiation	119	5343	70	0.013101	0.588235
8.381331456215865e-08	GO:BP	GO:0016241	regulation of macroautophagy	176	5343	94	0.017593	0.534091
8.906113058103178e-08	GO:BP	GO:0006289	nucleotide-excision repair	110	5343	66	0.012353	0.6
9.161467547316736e-08	GO:BP	GO:2001233	regulation of apoptotic signaling pathway	416	5343	186	0.034812	0.447115
9.170800601875537e-08	GO:BP	GO:0070085	glycosylation	267	5343	130	0.024331	0.486891
9.764207392054918e-08	GO:BP	GO:0048024	regulation of mRNA splicing, via spliceosome	117	5343	69	0.012914	0.589744
9.766235425854904e-08	GO:BP	GO:0015980	energy derivation by oxidation of organic compounds	288	5343	138	0.025828	0.479167
1.0463264265118953e-07	GO:BP	GO:1901988	negative regulation of cell cycle phase transition	270	5343	131	0.024518	0.485185
1.1362797711493473e-07	GO:BP	GO:0009101	glycoprotein biosynthetic process	344	5343	159	0.029759	0.462209
1.3528793192401324e-07	GO:BP	GO:0006508	proteolysis	1837	5343	667	0.124836	0.363092
1.3776609615593786e-07	GO:BP	GO:0071345	cellular response to cytokine stimulus	1143	5343	438	0.081976	0.383202
1.5302126555052508e-07	GO:BP	GO:0051170	import into nucleus	175	5343	93	0.017406	0.531429
1.5498754646971585e-07	GO:BP	GO:0010648	negative regulation of cell communication	1505	5343	558	0.104436	0.370764
1.556809775810606e-07	GO:BP	GO:0009126	purine nucleoside monophosphate metabolic process	40	5343	32	0.005989	0.8
1.745740353379481e-07	GO:BP	GO:0042759	long-chain fatty acid biosynthetic process	33	5343	28	0.005241	0.848485
1.8392883093730003e-07	GO:BP	GO:2001020	regulation of response to DNA damage stimulus	228	5343	114	0.021336	0.5
1.9357230419848634e-07	GO:BP	GO:0046395	carboxylic acid catabolic process	285	5343	136	0.025454	0.477193
1.9357230419848634e-07	GO:BP	GO:0016054	organic acid catabolic process	285	5343	136	0.025454	0.477193
2.002493482983897e-07	GO:BP	GO:0016192	vesicle-mediated transport	2156	5343	769	0.143927	0.356679
2.019415989938189e-07	GO:BP	GO:0023014	signal transduction by protein phosphorylation	959	5343	375	0.070185	0.391032
2.028334110168477e-07	GO:BP	GO:0050852	T cell receptor signaling pathway	203	5343	104	0.019465	0.512315
2.0737311893459137e-07	GO:BP	GO:0045859	regulation of protein kinase activity	810	5343	324	0.06064	0.4
2.101098485044182e-07	GO:BP	GO:0033157	regulation of intracellular protein transport	267	5343	129	0.024144	0.483146
2.239637497747293e-07	GO:BP	GO:0023057	negative regulation of signaling	1508	5343	558	0.104436	0.370027
2.2655426353869766e-07	GO:BP	GO:0010556	regulation of macromolecule biosynthetic process	4127	5343	1390	0.260153	0.336806
2.2994685010210342e-07	GO:BP	GO:0032880	regulation of protein localization	1010	5343	392	0.073367	0.388119
2.3564905108440214e-07	GO:BP	GO:0043085	positive regulation of catalytic activity	1475	5343	547	0.102377	0.370847
2.5862617427483675e-07	GO:BP	GO:0034030	ribonucleoside bisphosphate biosynthetic process	68	5343	46	0.008609	0.676471
2.5862617427483675e-07	GO:BP	GO:0033866	nucleoside bisphosphate biosynthetic process	68	5343	46	0.008609	0.676471
2.5862617427483675e-07	GO:BP	GO:0034033	purine nucleoside bisphosphate biosynthetic process	68	5343	46	0.008609	0.676471
2.642524658978861e-07	GO:BP	GO:0002218	activation of innate immune response	140	5343	78	0.014599	0.557143
2.691576653201484e-07	GO:BP	GO:0032388	positive regulation of intracellular transport	224	5343	112	0.020962	0.5
2.700593247869075e-07	GO:BP	GO:1901617	organic hydroxy compound biosynthetic process	260	5343	126	0.023582	0.484615
2.7799029819486584e-07	GO:BP	GO:0002478	antigen processing and presentation of exogenous peptide antigen	174	5343	92	0.017219	0.528736
3.0447091876938646e-07	GO:BP	GO:0033993	response to lipid	944	5343	369	0.069062	0.39089
3.120085007590261e-07	GO:BP	GO:0032204	regulation of telomere maintenance	81	5343	52	0.009732	0.641975
3.310409770316803e-07	GO:BP	GO:0032434	regulation of proteasomal ubiquitin-dependent protein catabolic process	131	5343	74	0.01385	0.564885
3.334279373423127e-07	GO:BP	GO:0051347	positive regulation of transferase activity	700	5343	285	0.053341	0.407143
3.362354533853516e-07	GO:BP	GO:0009167	purine ribonucleoside monophosphate metabolic process	37	5343	30	0.005615	0.810811
3.6763505160223897e-07	GO:BP	GO:0001932	regulation of protein phosphorylation	1506	5343	556	0.104061	0.36919
3.745429672037529e-07	GO:BP	GO:0051248	negative regulation of protein metabolic process	1213	5343	459	0.085907	0.378401
3.755592256052863e-07	GO:BP	GO:0051179	localization	6920	5343	2241	0.419427	0.323844
3.766098207289104e-07	GO:BP	GO:0051234	establishment of localization	5427	5343	1788	0.334643	0.329464
3.9263390579405397e-07	GO:BP	GO:0030522	intracellular receptor signaling pathway	269	5343	129	0.024144	0.479554
4.4362529491167896e-07	GO:BP	GO:0009132	nucleoside diphosphate metabolic process	158	5343	85	0.015909	0.537975
4.512992076401392e-07	GO:BP	GO:0062197	cellular response to chemical stress	368	5343	166	0.031069	0.451087
4.628070887443807e-07	GO:BP	GO:0006406	mRNA export from nucleus	113	5343	66	0.012353	0.584071
4.628070887443807e-07	GO:BP	GO:0071427	mRNA-containing ribonucleoprotein complex export from nucleus	113	5343	66	0.012353	0.584071
4.857431872900945e-07	GO:BP	GO:0000165	MAPK cascade	950	5343	370	0.069249	0.389474
5.060771587787211e-07	GO:BP	GO:0035601	protein deacylation	104	5343	62	0.011604	0.596154
5.066902508667185e-07	GO:BP	GO:0035337	fatty-acyl-CoA metabolic process	41	5343	32	0.005989	0.780488
5.095813852881874e-07	GO:BP	GO:0006278	RNA-dependent DNA biosynthetic process	71	5343	47	0.008797	0.661972
5.202827638969277e-07	GO:BP	GO:0008283	cell population proliferation	2069	5343	738	0.138125	0.356694
5.376536725362653e-07	GO:BP	GO:1903829	positive regulation of cellular protein localization	339	5343	155	0.02901	0.457227
5.528738413736992e-07	GO:BP	GO:0007004	telomere maintenance via telomerase	69	5343	46	0.008609	0.666667
5.998643253240004e-07	GO:BP	GO:1902533	positive regulation of intracellular signal transduction	1067	5343	409	0.076549	0.383318
6.283320720094172e-07	GO:BP	GO:0043487	regulation of RNA stability	196	5343	100	0.018716	0.510204
6.852260966955088e-07	GO:BP	GO:0070848	response to growth factor	759	5343	304	0.056897	0.400527
7.21363080659315e-07	GO:BP	GO:0030111	regulation of Wnt signaling pathway	378	5343	169	0.03163	0.44709
7.501905411166006e-07	GO:BP	GO:0031124	mRNA 3'-end processing	107	5343	63	0.011791	0.588785
7.652366754393423e-07	GO:BP	GO:0006986	response to unfolded protein	184	5343	95	0.01778	0.516304
7.955634573773459e-07	GO:BP	GO:0048585	negative regulation of response to stimulus	1773	5343	641	0.11997	0.361534
8.52569914202693e-07	GO:BP	GO:0016575	histone deacetylation	76	5343	49	0.009171	0.644737
8.928006086865715e-07	GO:BP	GO:1901532	regulation of hematopoietic progenitor cell differentiation	87	5343	54	0.010107	0.62069
9.121770326549156e-07	GO:BP	GO:0071407	cellular response to organic cyclic compound	591	5343	245	0.045854	0.414552
9.150630690369608e-07	GO:BP	GO:2000112	regulation of cellular macromolecule biosynthetic process	3997	5343	1344	0.251544	0.336252
9.246429794351372e-07	GO:BP	GO:0019884	antigen processing and presentation of exogenous antigen	182	5343	94	0.017593	0.516484
9.272494663361916e-07	GO:BP	GO:0000077	DNA damage checkpoint	150	5343	81	0.01516	0.54
9.298002507641777e-07	GO:BP	GO:0031398	positive regulation of protein ubiquitination	119	5343	68	0.012727	0.571429
9.298002507641777e-07	GO:BP	GO:0033559	unsaturated fatty acid metabolic process	119	5343	68	0.012727	0.571429
9.465306629446209e-07	GO:BP	GO:1902036	regulation of hematopoietic stem cell differentiation	74	5343	48	0.008984	0.648649
9.79714348887574e-07	GO:BP	GO:0010035	response to inorganic substance	580	5343	241	0.045106	0.415517
9.817572465937241e-07	GO:BP	GO:0006090	pyruvate metabolic process	155	5343	83	0.015534	0.535484
1.1106203089653387e-06	GO:BP	GO:0051783	regulation of nuclear division	190	5343	97	0.018155	0.510526
1.2706223588432933e-06	GO:BP	GO:0017038	protein import	203	5343	102	0.01909	0.502463
1.3222509835927983e-06	GO:BP	GO:0031667	response to nutrient levels	480	5343	205	0.038368	0.427083
1.3637658954414577e-06	GO:BP	GO:0042770	signal transduction in response to DNA damage	134	5343	74	0.01385	0.552239
1.5071760873774456e-06	GO:BP	GO:0034599	cellular response to oxidative stress	316	5343	145	0.027138	0.458861
1.712798105102219e-06	GO:BP	GO:0007017	microtubule-based process	864	5343	338	0.06326	0.391204
1.7451340303989536e-06	GO:BP	GO:0061013	regulation of mRNA catabolic process	209	5343	104	0.019465	0.497608
1.8056035450167824e-06	GO:BP	GO:0016052	carbohydrate catabolic process	204	5343	102	0.01909	0.5
1.8188500855969727e-06	GO:BP	GO:0006120	mitochondrial electron transport, NADH to ubiquinone	56	5343	39	0.007299	0.696429
1.9041118480024753e-06	GO:BP	GO:0061136	regulation of proteasomal protein catabolic process	194	5343	98	0.018342	0.505155
2.0308905841483862e-06	GO:BP	GO:0051650	establishment of vesicle localization	212	5343	105	0.019652	0.495283
2.058541984100809e-06	GO:BP	GO:0046467	membrane lipid biosynthetic process	147	5343	79	0.014786	0.537415
2.058541984100809e-06	GO:BP	GO:0016571	histone methylation	147	5343	79	0.014786	0.537415
2.061335850528544e-06	GO:BP	GO:0071103	DNA conformation change	355	5343	159	0.029759	0.447887
2.1600381246999735e-06	GO:BP	GO:0098732	macromolecule deacylation	109	5343	63	0.011791	0.577982
2.262558098940773e-06	GO:BP	GO:0001701	in utero embryonic development	369	5343	164	0.030694	0.444444
2.345133798441754e-06	GO:BP	GO:0022900	electron transport chain	187	5343	95	0.01778	0.508021
2.4106981785295917e-06	GO:BP	GO:0006486	protein glycosylation	254	5343	121	0.022646	0.476378
2.4106981785295917e-06	GO:BP	GO:0043413	macromolecule glycosylation	254	5343	121	0.022646	0.476378
2.4735394762412284e-06	GO:BP	GO:1900182	positive regulation of protein localization to nucleus	82	5343	51	0.009545	0.621951
2.47633090318786e-06	GO:BP	GO:0001889	liver development	145	5343	78	0.014599	0.537931
2.5317394586365207e-06	GO:BP	GO:0009112	nucleobase metabolic process	35	5343	28	0.005241	0.8
2.548517209920527e-06	GO:BP	GO:0010639	negative regulation of organelle organization	419	5343	182	0.034063	0.434368
2.669945806382915e-06	GO:BP	GO:0048731	system development	5096	5343	1678	0.314056	0.329278
2.7907798574498644e-06	GO:BP	GO:0007098	centrosome cycle	126	5343	70	0.013101	0.555556
3.0827889709362462e-06	GO:BP	GO:1900180	regulation of protein localization to nucleus	131	5343	72	0.013476	0.549618
3.139405156967667e-06	GO:BP	GO:0061008	hepaticobiliary system development	148	5343	79	0.014786	0.533784
3.279788469896187e-06	GO:BP	GO:0009168	purine ribonucleoside monophosphate biosynthetic process	20	5343	19	0.003556	0.95
3.4368633724464632e-06	GO:BP	GO:0046165	alcohol biosynthetic process	163	5343	85	0.015909	0.521472
3.4751249591438592e-06	GO:BP	GO:0035967	cellular response to topologically incorrect protein	168	5343	87	0.016283	0.517857
3.5198511994683204e-06	GO:BP	GO:0071363	cellular response to growth factor stimulus	731	5343	291	0.054464	0.398085
3.597459544014309e-06	GO:BP	GO:0002223	stimulatory C-type lectin receptor signaling pathway	110	5343	63	0.011791	0.572727
3.641287227870269e-06	GO:BP	GO:0009991	response to extracellular stimulus	513	5343	215	0.04024	0.419103
3.942210661848737e-06	GO:BP	GO:1905114	cell surface receptor signaling pathway involved in cell-cell signaling	639	5343	259	0.048475	0.405321
4.0708466890620514e-06	GO:BP	GO:0051648	vesicle localization	227	5343	110	0.020588	0.484581
4.086653412379949e-06	GO:BP	GO:0006487	protein N-linked glycosylation	74	5343	47	0.008797	0.635135
4.194358686142997e-06	GO:BP	GO:0032200	telomere organization	176	5343	90	0.016844	0.511364
4.706299628398702e-06	GO:BP	GO:0009790	embryo development	1058	5343	401	0.075051	0.379017
4.757271637734879e-06	GO:BP	GO:0034968	histone lysine methylation	120	5343	67	0.01254	0.558333
4.8139920678759855e-06	GO:BP	GO:0006575	cellular modified amino acid metabolic process	189	5343	95	0.01778	0.502646
4.9041322828631115e-06	GO:BP	GO:0006606	protein import into nucleus	154	5343	81	0.01516	0.525974
4.987200338149416e-06	GO:BP	GO:0015931	nucleobase-containing compound transport	267	5343	125	0.023395	0.468165
5.010836435851583e-06	GO:BP	GO:0035336	long-chain fatty-acyl-CoA metabolic process	25	5343	22	0.004118	0.88
5.091111975800406e-06	GO:BP	GO:2001242	regulation of intrinsic apoptotic signaling pathway	169	5343	87	0.016283	0.514793
5.1246672934526714e-06	GO:BP	GO:0009314	response to radiation	464	5343	197	0.036871	0.424569
5.295689319522489e-06	GO:BP	GO:0043620	regulation of DNA-templated transcription in response to stress	125	5343	69	0.012914	0.552
5.365647555117114e-06	GO:BP	GO:0060548	negative regulation of cell death	1047	5343	397	0.074303	0.379179
5.493709661146105e-06	GO:BP	GO:0046949	fatty-acyl-CoA biosynthetic process	32	5343	26	0.004866	0.8125
5.8230600376025885e-06	GO:BP	GO:0043488	regulation of mRNA stability	187	5343	94	0.017593	0.502674
6.166660541462685e-06	GO:BP	GO:0046470	phosphatidylcholine metabolic process	88	5343	53	0.00992	0.602273
6.360214473912295e-06	GO:BP	GO:0071900	regulation of protein serine/threonine kinase activity	530	5343	220	0.041175	0.415094
6.819830588663978e-06	GO:BP	GO:0044087	regulation of cellular component biogenesis	989	5343	377	0.07056	0.381193
7.134575879484328e-06	GO:BP	GO:0070201	regulation of establishment of protein localization	712	5343	283	0.052966	0.397472
7.22814896776768e-06	GO:BP	GO:0034660	ncRNA metabolic process	491	5343	206	0.038555	0.419552
7.357929759415874e-06	GO:BP	GO:0043066	negative regulation of apoptotic process	930	5343	357	0.066816	0.383871
7.436724599754544e-06	GO:BP	GO:0045931	positive regulation of mitotic cell cycle	165	5343	85	0.015909	0.515152
7.436724599754544e-06	GO:BP	GO:0007088	regulation of mitotic nuclear division	165	5343	85	0.015909	0.515152
7.635230933114932e-06	GO:BP	GO:1904356	regulation of telomere maintenance via telomere lengthening	62	5343	41	0.007674	0.66129
7.735866791886659e-06	GO:BP	GO:0000280	nuclear division	424	5343	182	0.034063	0.429245
7.76900443927254e-06	GO:BP	GO:0034248	regulation of cellular amide metabolic process	514	5343	214	0.040052	0.416342
7.941222538600927e-06	GO:BP	GO:0031023	microtubule organizing center organization	138	5343	74	0.01385	0.536232
8.044425710000686e-06	GO:BP	GO:0009127	purine nucleoside monophosphate biosynthetic process	22	5343	20	0.003743	0.909091
8.091310877469457e-06	GO:BP	GO:0034311	diol metabolic process	27	5343	23	0.004305	0.851852
8.27711444112942e-06	GO:BP	GO:0038061	NIK/NF-kappaB signaling	188	5343	94	0.017593	0.5
8.388043743471358e-06	GO:BP	GO:0048285	organelle fission	472	5343	199	0.037245	0.42161
8.848444184742379e-06	GO:BP	GO:0042273	ribosomal large subunit biogenesis	73	5343	46	0.008609	0.630137
8.941741450665985e-06	GO:BP	GO:0031123	RNA 3'-end processing	158	5343	82	0.015347	0.518987
8.941741450665985e-06	GO:BP	GO:0000070	mitotic sister chromatid segregation	158	5343	82	0.015347	0.518987
9.22531487116844e-06	GO:BP	GO:0032502	developmental process	6676	5343	2152	0.40277	0.322349
9.351031758334077e-06	GO:BP	GO:0043068	positive regulation of programmed cell death	702	5343	279	0.052218	0.397436
9.57506658242874e-06	GO:BP	GO:0051438	regulation of ubiquitin-protein transferase activity	56	5343	38	0.007112	0.678571
9.82300589054686e-06	GO:BP	GO:0042775	mitochondrial ATP synthesis coupled electron transport	98	5343	57	0.010668	0.581633
9.911629020251227e-06	GO:BP	GO:0051983	regulation of chromosome segregation	105	5343	60	0.01123	0.571429
9.911629020251227e-06	GO:BP	GO:0070498	interleukin-1-mediated signaling pathway	105	5343	60	0.01123	0.571429
1.0121761841539764e-05	GO:BP	GO:0000387	spliceosomal snRNP assembly	40	5343	30	0.005615	0.75
1.0122344728769562e-05	GO:BP	GO:0010942	positive regulation of cell death	758	5343	298	0.055774	0.39314
1.1253194687831602e-05	GO:BP	GO:2000573	positive regulation of DNA biosynthetic process	69	5343	44	0.008235	0.637681
1.1253198410240478e-05	GO:BP	GO:0010565	regulation of cellular ketone metabolic process	194	5343	96	0.017967	0.494845
1.1703782894664453e-05	GO:BP	GO:0000819	sister chromatid segregation	189	5343	94	0.017593	0.497354
1.1752980817432354e-05	GO:BP	GO:0002181	cytoplasmic translation	103	5343	59	0.011042	0.572816
1.209829199018546e-05	GO:BP	GO:0006810	transport	5299	5343	1733	0.32435	0.327043
1.2671388860473137e-05	GO:BP	GO:0060218	hematopoietic stem cell differentiation	87	5343	52	0.009732	0.597701
1.268145833298894e-05	GO:BP	GO:0051701	interaction with host	215	5343	104	0.019465	0.483721
1.2703808074701047e-05	GO:BP	GO:0061418	regulation of transcription from RNA polymerase II promoter in response to hypoxia	78	5343	48	0.008984	0.615385
1.297250921510244e-05	GO:BP	GO:0007093	mitotic cell cycle checkpoint	169	5343	86	0.016096	0.508876
1.3547596651856484e-05	GO:BP	GO:0048856	anatomical structure development	6143	5343	1989	0.372263	0.323783
1.3611358088575951e-05	GO:BP	GO:0048002	antigen processing and presentation of peptide antigen	192	5343	95	0.01778	0.494792
1.4428918472543207e-05	GO:BP	GO:0043065	positive regulation of apoptotic process	693	5343	275	0.051469	0.396825
1.4552456957379071e-05	GO:BP	GO:0006165	nucleoside diphosphate phosphorylation	137	5343	73	0.013663	0.532847
1.549074345093424e-05	GO:BP	GO:0002220	innate immune response activating cell surface receptor signaling pathway	113	5343	63	0.011791	0.557522
1.648722427909105e-05	GO:BP	GO:0042773	ATP synthesis coupled electron transport	99	5343	57	0.010668	0.575758
1.7186395888094297e-05	GO:BP	GO:0022904	respiratory electron transport chain	118	5343	65	0.012165	0.550847
1.8148118071192112e-05	GO:BP	GO:1902275	regulation of chromatin organization	198	5343	97	0.018155	0.489899
1.9052276348761277e-05	GO:BP	GO:0045333	cellular respiration	193	5343	95	0.01778	0.492228
1.9142666759365385e-05	GO:BP	GO:0051348	negative regulation of transferase activity	296	5343	134	0.02508	0.452703
2.1547169393448486e-05	GO:BP	GO:0046471	phosphatidylglycerol metabolic process	35	5343	27	0.005053	0.771429
2.17523941921467e-05	GO:BP	GO:0006887	exocytosis	902	5343	345	0.06457	0.382483
2.1977381766160832e-05	GO:BP	GO:0033865	nucleoside bisphosphate metabolic process	138	5343	73	0.013663	0.528986
2.1977381766160832e-05	GO:BP	GO:0034032	purine nucleoside bisphosphate metabolic process	138	5343	73	0.013663	0.528986
2.1977381766160832e-05	GO:BP	GO:0033875	ribonucleoside bisphosphate metabolic process	138	5343	73	0.013663	0.528986
2.206710754348829e-05	GO:BP	GO:0000380	alternative mRNA splicing, via spliceosome	88	5343	52	0.009732	0.590909
2.2698084008714222e-05	GO:BP	GO:0043069	negative regulation of programmed cell death	953	5343	362	0.067752	0.379853
2.2775864448983358e-05	GO:BP	GO:0048545	response to steroid hormone	354	5343	155	0.02901	0.437853
2.299664465165159e-05	GO:BP	GO:0009411	response to UV	148	5343	77	0.014411	0.52027
2.366614789446561e-05	GO:BP	GO:0072523	purine-containing compound catabolic process	53	5343	36	0.006738	0.679245
2.3992652579780703e-05	GO:BP	GO:1904358	positive regulation of telomere maintenance via telomere lengthening	37	5343	28	0.005241	0.756757
2.41364757256876e-05	GO:BP	GO:0007005	mitochondrion organization	560	5343	228	0.042673	0.407143
2.4645931604280608e-05	GO:BP	GO:0002758	innate immune response-activating signal transduction	114	5343	63	0.011791	0.552632
2.5054277285027334e-05	GO:BP	GO:0032206	positive regulation of telomere maintenance	51	5343	35	0.006551	0.686275
2.516074155002514e-05	GO:BP	GO:0051098	regulation of binding	371	5343	161	0.030133	0.433962
2.695395348677505e-05	GO:BP	GO:0043618	regulation of transcription from RNA polymerase II promoter in response to stress	119	5343	65	0.012165	0.546218
2.698678987090089e-05	GO:BP	GO:0072528	pyrimidine-containing compound biosynthetic process	41	5343	30	0.005615	0.731707
2.7081648579635142e-05	GO:BP	GO:0042398	cellular modified amino acid biosynthetic process	47	5343	33	0.006176	0.702128
2.8352066617968848e-05	GO:BP	GO:0001933	negative regulation of protein phosphorylation	447	5343	188	0.035186	0.420582
2.8545503970611573e-05	GO:BP	GO:2001234	negative regulation of apoptotic signaling pathway	236	5343	111	0.020775	0.470339
2.887990367416541e-05	GO:BP	GO:0007275	multicellular organism development	5638	5343	1832	0.342879	0.324938
2.974881576145839e-05	GO:BP	GO:0046033	AMP metabolic process	15	5343	15	0.002807	1.0
3.06387260306127e-05	GO:BP	GO:1901605	alpha-amino acid metabolic process	210	5343	101	0.018903	0.480952
3.208809041622243e-05	GO:BP	GO:0070507	regulation of microtubule cytoskeleton organization	192	5343	94	0.017593	0.489583
3.238861044265238e-05	GO:BP	GO:0018209	peptidyl-serine modification	339	5343	149	0.027887	0.439528
3.292613408106739e-05	GO:BP	GO:0046939	nucleotide phosphorylation	139	5343	73	0.013663	0.52518
3.379367797399581e-05	GO:BP	GO:0036149	phosphatidylinositol acyl-chain remodeling	18	5343	17	0.003182	0.944444
3.4816736211779135e-05	GO:BP	GO:0048193	Golgi vesicle transport	378	5343	163	0.030507	0.431217
3.534426731534781e-05	GO:BP	GO:1901292	nucleoside phosphate catabolic process	73	5343	45	0.008422	0.616438
3.732664583317444e-05	GO:BP	GO:0045732	positive regulation of protein catabolic process	229	5343	108	0.020213	0.471616
4.052378697717285e-05	GO:BP	GO:0009185	ribonucleoside diphosphate metabolic process	142	5343	74	0.01385	0.521127
4.1975498104221115e-05	GO:BP	GO:0042594	response to starvation	198	5343	96	0.017967	0.484848
4.330903999605045e-05	GO:BP	GO:0019216	regulation of lipid metabolic process	435	5343	183	0.03425	0.42069
4.5925025262433426e-05	GO:BP	GO:0098727	maintenance of cell number	170	5343	85	0.015909	0.5
4.6965601778485606e-05	GO:BP	GO:0006006	glucose metabolic process	214	5343	102	0.01909	0.476636
4.93011824121789e-05	GO:BP	GO:0090316	positive regulation of intracellular protein transport	183	5343	90	0.016844	0.491803
4.93011824121789e-05	GO:BP	GO:0030177	positive regulation of Wnt signaling pathway	183	5343	90	0.016844	0.491803
5.030431849820638e-05	GO:BP	GO:0032392	DNA geometric change	118	5343	64	0.011978	0.542373
5.0712612039540866e-05	GO:BP	GO:0032210	regulation of telomere maintenance via telomerase	54	5343	36	0.006738	0.666667
5.314606831393183e-05	GO:BP	GO:0000079	regulation of cyclin-dependent protein serine/threonine kinase activity	99	5343	56	0.010481	0.565657
5.556068827064171e-05	GO:BP	GO:0019827	stem cell population maintenance	168	5343	84	0.015722	0.5
5.57863740439077e-05	GO:BP	GO:2000278	regulation of DNA biosynthetic process	111	5343	61	0.011417	0.54955
5.669398038072121e-05	GO:BP	GO:0043393	regulation of protein binding	212	5343	101	0.018903	0.476415
5.826182032896694e-05	GO:BP	GO:0045862	positive regulation of proteolysis	372	5343	160	0.029946	0.430108
5.853730022620938e-05	GO:BP	GO:0050878	regulation of body fluid levels	519	5343	212	0.039678	0.408478
6.068213578521025e-05	GO:BP	GO:0007167	enzyme linked receptor protein signaling pathway	1102	5343	409	0.076549	0.371143
6.151524898308068e-05	GO:BP	GO:0016050	vesicle organization	339	5343	148	0.0277	0.436578
6.356579532715627e-05	GO:BP	GO:0042326	negative regulation of phosphorylation	488	5343	201	0.037619	0.411885
6.49897115512713e-05	GO:BP	GO:0008213	protein alkylation	189	5343	92	0.017219	0.486772
6.49897115512713e-05	GO:BP	GO:0006479	protein methylation	189	5343	92	0.017219	0.486772
6.731489608703429e-05	GO:BP	GO:0034470	ncRNA processing	395	5343	168	0.031443	0.425316
8.08697719142284e-05	GO:BP	GO:0045088	regulation of innate immune response	299	5343	133	0.024892	0.444816
8.721418117462037e-05	GO:BP	GO:0048608	reproductive structure development	447	5343	186	0.034812	0.416107
8.872343153351889e-05	GO:BP	GO:0019882	antigen processing and presentation	232	5343	108	0.020213	0.465517
9.438093734041026e-05	GO:BP	GO:1902532	negative regulation of intracellular signal transduction	562	5343	226	0.042298	0.402135
9.533032102781833e-05	GO:BP	GO:0097305	response to alcohol	259	5343	118	0.022085	0.455598
0.00010050064367677532	GO:BP	GO:0046341	CDP-diacylglycerol metabolic process	14	5343	14	0.00262	1.0
0.00010168407578973863	GO:BP	GO:1901136	carbohydrate derivative catabolic process	193	5343	93	0.017406	0.481865
0.0001040408276126854	GO:BP	GO:0030155	regulation of cell adhesion	738	5343	286	0.053528	0.387534
0.00010922944808514931	GO:BP	GO:0061458	reproductive system development	451	5343	187	0.034999	0.414634
0.00011218797862925606	GO:BP	GO:0046822	regulation of nucleocytoplasmic transport	115	5343	62	0.011604	0.53913
0.00011275171529633818	GO:BP	GO:0000470	maturation of LSU-rRNA	29	5343	23	0.004305	0.793103
0.00011275171529633818	GO:BP	GO:0070979	protein K11-linked ubiquitination	29	5343	23	0.004305	0.793103
0.00011275171529633818	GO:BP	GO:0036151	phosphatidylcholine acyl-chain remodeling	29	5343	23	0.004305	0.793103
0.00011491933339077452	GO:BP	GO:1904029	regulation of cyclin-dependent protein kinase activity	103	5343	57	0.010668	0.553398
0.00011916531377182329	GO:BP	GO:0070482	response to oxygen levels	409	5343	172	0.032192	0.420538
0.00012270412422764202	GO:BP	GO:0071466	cellular response to xenobiotic stimulus	125	5343	66	0.012353	0.528
0.00012506119955085196	GO:BP	GO:0097659	nucleic acid-templated transcription	3701	5343	1231	0.230395	0.332613
0.00012517078610489613	GO:BP	GO:0030162	regulation of proteolysis	757	5343	292	0.054651	0.385733
0.00012786760063006555	GO:BP	GO:0019058	viral life cycle	345	5343	149	0.027887	0.431884
0.00013574069229833937	GO:BP	GO:0048869	cellular developmental process	4468	5343	1467	0.274565	0.328335
0.00013883236846260578	GO:BP	GO:0050821	protein stabilization	181	5343	88	0.01647	0.486188
0.00015001723405375986	GO:BP	GO:0071383	cellular response to steroid hormone stimulus	210	5343	99	0.018529	0.471429
0.0001514950240688491	GO:BP	GO:2001251	negative regulation of chromosome organization	148	5343	75	0.014037	0.506757
0.0001514950240688491	GO:BP	GO:0034620	cellular response to unfolded protein	148	5343	75	0.014037	0.506757
0.00015192112911235716	GO:BP	GO:0009636	response to toxic substance	250	5343	114	0.021336	0.456
0.00015308328749495545	GO:BP	GO:0002520	immune system development	1040	5343	386	0.072244	0.371154
0.00015744115221514896	GO:BP	GO:0043094	cellular metabolic compound salvage	35	5343	26	0.004866	0.742857
0.00017680502065871938	GO:BP	GO:0072527	pyrimidine-containing compound metabolic process	85	5343	49	0.009171	0.576471
0.00017870635208633472	GO:BP	GO:0032774	RNA biosynthetic process	3716	5343	1234	0.230956	0.332078
0.00021071231145298932	GO:BP	GO:0009611	response to wounding	672	5343	262	0.049036	0.389881
0.0002189427944399726	GO:BP	GO:0006469	negative regulation of protein kinase activity	246	5343	112	0.020962	0.455285
0.00022482650207432753	GO:BP	GO:0009135	purine nucleoside diphosphate metabolic process	139	5343	71	0.013288	0.510791
0.00022482650207432753	GO:BP	GO:0009179	purine ribonucleoside diphosphate metabolic process	139	5343	71	0.013288	0.510791
0.00023142823840588598	GO:BP	GO:0035338	long-chain fatty-acyl-CoA biosynthetic process	19	5343	17	0.003182	0.894737
0.0002404079436972895	GO:BP	GO:0098813	nuclear chromosome segregation	268	5343	120	0.022459	0.447761
0.00024903535642558207	GO:BP	GO:0034440	lipid oxidation	112	5343	60	0.01123	0.535714
0.00025929838365479634	GO:BP	GO:0006301	postreplication repair	52	5343	34	0.006363	0.653846
0.00026060277436206473	GO:BP	GO:1990823	response to leukemia inhibitory factor	100	5343	55	0.010294	0.55
0.00026060277436206473	GO:BP	GO:0046364	monosaccharide biosynthetic process	100	5343	55	0.010294	0.55
0.0002718459827189532	GO:BP	GO:0046031	ADP metabolic process	127	5343	66	0.012353	0.519685
0.00029996215814175736	GO:BP	GO:0032508	DNA duplex unwinding	110	5343	59	0.011042	0.536364
0.0003091533368773609	GO:BP	GO:0009895	negative regulation of catabolic process	324	5343	140	0.026203	0.432099
0.00032299566238111173	GO:BP	GO:0006805	xenobiotic metabolic process	120	5343	63	0.011791	0.525
0.00033162978938371714	GO:BP	GO:0018105	peptidyl-serine phosphorylation	316	5343	137	0.025641	0.433544
0.0003394772211550963	GO:BP	GO:0030497	fatty acid elongation	13	5343	13	0.002433	1.0
0.0003394772211550963	GO:BP	GO:0046040	IMP metabolic process	13	5343	13	0.002433	1.0
0.0003394772211550963	GO:BP	GO:0016024	CDP-diacylglycerol biosynthetic process	13	5343	13	0.002433	1.0
0.00034429202131728214	GO:BP	GO:0000381	regulation of alternative mRNA splicing, via spliceosome	77	5343	45	0.008422	0.584416
0.0003583581325787683	GO:BP	GO:0046456	icosanoid biosynthetic process	59	5343	37	0.006925	0.627119
0.0003612591566628213	GO:BP	GO:0030330	DNA damage response, signal transduction by p53 class mediator	108	5343	58	0.010855	0.537037
0.0003624565528028693	GO:BP	GO:0009792	embryo development ending in birth or egg hatching	655	5343	255	0.047726	0.389313
0.0003737248304310772	GO:BP	GO:0035567	non-canonical Wnt signaling pathway	148	5343	74	0.01385	0.5
0.0003783070614127189	GO:BP	GO:0045736	negative regulation of cyclin-dependent protein serine/threonine kinase activity	32	5343	24	0.004492	0.75
0.00038273775726129785	GO:BP	GO:0046519	sphingoid metabolic process	21	5343	18	0.003369	0.857143
0.00038273775726129785	GO:BP	GO:0036150	phosphatidylserine acyl-chain remodeling	21	5343	18	0.003369	0.857143
0.00038273775726129785	GO:BP	GO:1901687	glutathione derivative biosynthetic process	21	5343	18	0.003369	0.857143
0.00038273775726129785	GO:BP	GO:1901685	glutathione derivative metabolic process	21	5343	18	0.003369	0.857143
0.00039567339258007644	GO:BP	GO:0009163	nucleoside biosynthetic process	40	5343	28	0.005241	0.7
0.00039785661239544185	GO:BP	GO:0032212	positive regulation of telomere maintenance via telomerase	34	5343	25	0.004679	0.735294
0.00039954641416824384	GO:BP	GO:0030968	endoplasmic reticulum unfolded protein response	128	5343	66	0.012353	0.515625
0.0004054584746997787	GO:BP	GO:0050891	multicellular organismal water homeostasis	75	5343	44	0.008235	0.586667
0.000413211762244722	GO:BP	GO:0031397	negative regulation of protein ubiquitination	82	5343	47	0.008797	0.573171
0.0004425911673422926	GO:BP	GO:0043408	regulation of MAPK cascade	760	5343	290	0.054277	0.381579
0.00044863885222432226	GO:BP	GO:0019319	hexose biosynthetic process	94	5343	52	0.009732	0.553191
0.0004649758448859632	GO:BP	GO:0060249	anatomical structure homeostasis	476	5343	193	0.036122	0.405462
0.000468268999546957	GO:BP	GO:0007163	establishment or maintenance of cell polarity	206	5343	96	0.017967	0.466019
0.00047680376002451867	GO:BP	GO:0072422	signal transduction involved in DNA damage checkpoint	73	5343	43	0.008048	0.589041
0.00047680376002451867	GO:BP	GO:0072401	signal transduction involved in DNA integrity checkpoint	73	5343	43	0.008048	0.589041
0.00047834005366584006	GO:BP	GO:0034502	protein localization to chromosome	87	5343	49	0.009171	0.563218
0.000489858291332202	GO:BP	GO:1990830	cellular response to leukemia inhibitory factor	99	5343	54	0.010107	0.545455
0.0005017270963171943	GO:BP	GO:0042127	regulation of cell population proliferation	1779	5343	622	0.116414	0.349635
0.0005157925530251756	GO:BP	GO:0045055	regulated exocytosis	779	5343	296	0.0554	0.379974
0.0005178128933167743	GO:BP	GO:0071496	cellular response to external stimulus	318	5343	137	0.025641	0.430818
0.0005312556291447694	GO:BP	GO:0043009	chordate embryonic development	634	5343	247	0.046229	0.38959
0.0005409056101506882	GO:BP	GO:0009226	nucleotide-sugar biosynthetic process	23	5343	19	0.003556	0.826087
0.000547371368568943	GO:BP	GO:1902850	microtubule cytoskeleton organization involved in mitosis	144	5343	72	0.013476	0.5
0.0005500458347313859	GO:BP	GO:1902750	negative regulation of cell cycle G2/M phase transition	109	5343	58	0.010855	0.53211
0.0005707405862547406	GO:BP	GO:0032886	regulation of microtubule-based process	247	5343	111	0.020775	0.449393
0.0005842510748374535	GO:BP	GO:0022406	membrane docking	183	5343	87	0.016283	0.47541
0.0005842510748374535	GO:BP	GO:0007051	spindle organization	183	5343	87	0.016283	0.47541
0.0006125827672522747	GO:BP	GO:1904951	positive regulation of establishment of protein localization	406	5343	168	0.031443	0.413793
0.0006132639959324695	GO:BP	GO:0090263	positive regulation of canonical Wnt signaling pathway	152	5343	75	0.014037	0.493421
0.0006350508414771448	GO:BP	GO:0071453	cellular response to oxygen levels	242	5343	109	0.020401	0.450413
0.0006393885458166603	GO:BP	GO:0010212	response to ionizing radiation	147	5343	73	0.013663	0.496599
0.0006418527901269049	GO:BP	GO:0009066	aspartate family amino acid metabolic process	49	5343	32	0.005989	0.653061
0.0006418527901269049	GO:BP	GO:0034656	nucleobase-containing small molecule catabolic process	49	5343	32	0.005989	0.653061
0.0006816857871617032	GO:BP	GO:0018022	peptidyl-lysine methylation	137	5343	69	0.012914	0.50365
0.0006875454626090985	GO:BP	GO:0043312	neutrophil degranulation	484	5343	195	0.036496	0.402893
0.0006878585011974179	GO:BP	GO:0033119	negative regulation of RNA splicing	25	5343	20	0.003743	0.8
0.0006960748523298747	GO:BP	GO:0009410	response to xenobiotic stimulus	132	5343	67	0.01254	0.507576
0.0007015662428723647	GO:BP	GO:0036148	phosphatidylglycerol acyl-chain remodeling	18	5343	16	0.002995	0.888889
0.0007015662428723647	GO:BP	GO:0052695	cellular glucuronidation	18	5343	16	0.002995	0.888889
0.0007065768252042696	GO:BP	GO:0097237	cellular response to toxic substance	122	5343	63	0.011791	0.516393
0.0007065776393865849	GO:BP	GO:0031146	SCF-dependent proteasomal ubiquitin-dependent protein catabolic process	95	5343	52	0.009732	0.547368
0.0007353772936793125	GO:BP	GO:0030154	cell differentiation	4388	5343	1434	0.268389	0.3268
0.0007420718912987211	GO:BP	GO:1903364	positive regulation of cellular protein catabolic process	150	5343	74	0.01385	0.493333
0.0007589843329927948	GO:BP	GO:0006672	ceramide metabolic process	100	5343	54	0.010107	0.54
0.0007665683767512032	GO:BP	GO:0002009	morphogenesis of an epithelium	566	5343	223	0.041737	0.393993
0.0007676851248016753	GO:BP	GO:0009166	nucleotide catabolic process	67	5343	40	0.007486	0.597015
0.0007727844348732237	GO:BP	GO:0006195	purine nucleotide catabolic process	45	5343	30	0.005615	0.666667
0.000800270732125286	GO:BP	GO:0051223	regulation of protein transport	687	5343	264	0.04941	0.384279
0.0008111665522245098	GO:BP	GO:0015949	nucleobase-containing small molecule interconversion	27	5343	21	0.00393	0.777778
0.0008123849147130324	GO:BP	GO:0072395	signal transduction involved in cell cycle checkpoint	74	5343	43	0.008048	0.581081
0.0008482596888530718	GO:BP	GO:1903321	negative regulation of protein modification by small protein conjugation or removal	93	5343	51	0.009545	0.548387
0.0008513507853250375	GO:BP	GO:2000045	regulation of G1/S transition of mitotic cell cycle	179	5343	85	0.015909	0.47486
0.0008560287086813673	GO:BP	GO:0031056	regulation of histone modification	153	5343	75	0.014037	0.490196
0.000887585601032658	GO:BP	GO:0060828	regulation of canonical Wnt signaling pathway	301	5343	130	0.024331	0.431894
0.0008940212499058584	GO:BP	GO:0009187	cyclic nucleotide metabolic process	41	5343	28	0.005241	0.682927
0.0009115090936645176	GO:BP	GO:0000302	response to reactive oxygen species	238	5343	107	0.020026	0.44958
0.0009433802803005943	GO:BP	GO:0009225	nucleotide-sugar metabolic process	39	5343	27	0.005053	0.692308
0.0009433802803005943	GO:BP	GO:0042769	DNA damage response, detection of DNA damage	39	5343	27	0.005053	0.692308
0.0009623775477347301	GO:BP	GO:0006457	protein folding	222	5343	101	0.018903	0.454955
0.0009626580063365893	GO:BP	GO:1900034	regulation of cellular response to heat	79	5343	45	0.008422	0.56962
0.0009861469623359683	GO:BP	GO:1901654	response to ketone	206	5343	95	0.01778	0.461165
0.0009955186038719214	GO:BP	GO:1904030	negative regulation of cyclin-dependent protein kinase activity	33	5343	24	0.004492	0.727273
0.0009974450338705758	GO:BP	GO:0042327	positive regulation of phosphorylation	1114	5343	405	0.0758	0.363555
0.0010008695648220877	GO:BP	GO:1901989	positive regulation of cell cycle phase transition	108	5343	57	0.010668	0.527778
0.001015213334216409	GO:BP	GO:0071396	cellular response to lipid	603	5343	235	0.043983	0.389718
0.0010180515960367012	GO:BP	GO:0006094	gluconeogenesis	91	5343	50	0.009358	0.549451
0.001082493219350607	GO:BP	GO:1902806	regulation of cell cycle G1/S phase transition	201	5343	93	0.017406	0.462687
0.0011317001997971279	GO:BP	GO:0006749	glutathione metabolic process	52	5343	33	0.006176	0.634615
0.0011317001997971279	GO:BP	GO:0045103	intermediate filament-based process	52	5343	33	0.006176	0.634615
0.0011469918142784728	GO:BP	GO:0002283	neutrophil activation involved in immune response	487	5343	195	0.036496	0.400411
0.0011526900819672364	GO:BP	GO:0051716	cellular response to stimulus	7777	5343	2456	0.459667	0.315803
0.0012231566525535533	GO:BP	GO:0008202	steroid metabolic process	336	5343	142	0.026577	0.422619
0.0012353105347290279	GO:BP	GO:0006351	transcription, DNA-templated	3652	5343	1205	0.225529	0.329956
0.0012774824798940858	GO:BP	GO:0060429	epithelium development	1344	5343	479	0.08965	0.356399
0.001295479119128513	GO:BP	GO:0031330	negative regulation of cellular catabolic process	264	5343	116	0.021711	0.439394
0.0013452325717853949	GO:BP	GO:0051403	stress-activated MAPK cascade	289	5343	125	0.023395	0.432526
0.0013591923184808378	GO:BP	GO:0002479	antigen processing and presentation of exogenous peptide antigen via MHC class I, TAP-dependent	75	5343	43	0.008048	0.573333
0.0013740805430394914	GO:BP	GO:0033673	negative regulation of kinase activity	267	5343	117	0.021898	0.438202
0.0014070915556010904	GO:BP	GO:0001775	cell activation	1497	5343	528	0.098821	0.352705
0.0014177541922836205	GO:BP	GO:0048534	hematopoietic or lymphoid organ development	986	5343	362	0.067752	0.36714
0.00142711541970912	GO:BP	GO:0036293	response to decreased oxygen levels	382	5343	158	0.029571	0.413613
0.0014295564245761965	GO:BP	GO:0016574	histone ubiquitination	48	5343	31	0.005802	0.645833
0.0014587901762389886	GO:BP	GO:2000060	positive regulation of ubiquitin-dependent protein catabolic process	104	5343	55	0.010294	0.528846
0.0014804131606384	GO:BP	GO:0002831	regulation of response to biotic stimulus	405	5343	166	0.031069	0.409877
0.001504752741533983	GO:BP	GO:0046777	protein autophosphorylation	240	5343	107	0.020026	0.445833
0.001511612756378257	GO:BP	GO:1990748	cellular detoxification	114	5343	59	0.011042	0.517544
0.0015169451787667887	GO:BP	GO:0009190	cyclic nucleotide biosynthetic process	22	5343	18	0.003369	0.818182
0.0015169451787667887	GO:BP	GO:0070987	error-free translesion synthesis	22	5343	18	0.003369	0.818182
0.0015169451787667887	GO:BP	GO:0052652	cyclic purine nucleotide metabolic process	22	5343	18	0.003369	0.818182
0.0015388716290239972	GO:BP	GO:0002244	hematopoietic progenitor cell differentiation	181	5343	85	0.015909	0.469613
0.0015652187107089534	GO:BP	GO:0010257	NADH dehydrogenase complex assembly	66	5343	39	0.007299	0.590909
0.0015652187107089534	GO:BP	GO:0032981	mitochondrial respiratory chain complex I assembly	66	5343	39	0.007299	0.590909
0.0016073860511498774	GO:BP	GO:0048584	positive regulation of response to stimulus	2476	5343	838	0.156841	0.338449
0.0016796590110170324	GO:BP	GO:0002446	neutrophil mediated immunity	498	5343	198	0.037058	0.39759
0.0016891946465480586	GO:BP	GO:0010972	negative regulation of G2/M transition of mitotic cell cycle	97	5343	52	0.009732	0.536082
0.0017725794866976976	GO:BP	GO:0032147	activation of protein kinase activity	335	5343	141	0.02639	0.420896
0.0017796070726388204	GO:BP	GO:0045944	positive regulation of transcription by RNA polymerase II	1267	5343	453	0.084784	0.357537
0.0018068414532155265	GO:BP	GO:1905269	positive regulation of chromatin organization	107	5343	56	0.010481	0.523364
0.0018169092133443843	GO:BP	GO:0048729	tissue morphogenesis	678	5343	259	0.048475	0.382006
0.0018365654174545656	GO:BP	GO:0044783	G1 DNA damage checkpoint	64	5343	38	0.007112	0.59375
0.0018365654174545656	GO:BP	GO:0044786	cell cycle DNA replication	64	5343	38	0.007112	0.59375
0.001996409036154135	GO:BP	GO:0043299	leukocyte degranulation	537	5343	211	0.039491	0.392924
0.0020105002815930914	GO:BP	GO:0044106	cellular amine metabolic process	135	5343	67	0.01254	0.496296
0.002035824005949424	GO:BP	GO:0097711	ciliary basal body-plasma membrane docking	95	5343	51	0.009545	0.536842
0.0020692745442014867	GO:BP	GO:0010821	regulation of mitochondrion organization	190	5343	88	0.01647	0.463158
0.0020692745442014867	GO:BP	GO:1902115	regulation of organelle assembly	190	5343	88	0.01647	0.463158
0.002084428427445499	GO:BP	GO:0032606	type I interferon production	130	5343	65	0.012165	0.5
0.002084428427445499	GO:BP	GO:0034605	cellular response to heat	130	5343	65	0.012165	0.5
0.002105027888641469	GO:BP	GO:0033045	regulation of sister chromatid segregation	83	5343	46	0.008609	0.554217
0.0021448630631496573	GO:BP	GO:0036152	phosphatidylethanolamine acyl-chain remodeling	26	5343	20	0.003743	0.769231
0.0021448630631496573	GO:BP	GO:0044068	modulation by symbiont of host cellular process	26	5343	20	0.003743	0.769231
0.0021448630631496573	GO:BP	GO:1904666	regulation of ubiquitin protein ligase activity	26	5343	20	0.003743	0.769231
0.0021448630631496573	GO:BP	GO:0015012	heparan sulfate proteoglycan biosynthetic process	26	5343	20	0.003743	0.769231
0.0021884912659722025	GO:BP	GO:0045785	positive regulation of cell adhesion	433	5343	175	0.032753	0.404157
0.0022254807974655066	GO:BP	GO:0046466	membrane lipid catabolic process	38	5343	26	0.004866	0.684211
0.002345718709655518	GO:BP	GO:0006213	pyrimidine nucleoside metabolic process	36	5343	25	0.004679	0.694444
0.002394285425812285	GO:BP	GO:0031669	cellular response to nutrient levels	212	5343	96	0.017967	0.45283
0.002421148765427188	GO:BP	GO:0009888	tissue development	2135	5343	729	0.13644	0.341452
0.002429907383415465	GO:BP	GO:0000038	very long-chain fatty acid metabolic process	34	5343	24	0.004492	0.705882
0.002429907383415465	GO:BP	GO:0000083	regulation of transcription involved in G1/S transition of mitotic cell cycle	34	5343	24	0.004492	0.705882
0.002436900686036833	GO:BP	GO:0050686	negative regulation of mRNA processing	30	5343	22	0.004118	0.733333
0.002436900686036833	GO:BP	GO:0070198	protein localization to chromosome, telomeric region	30	5343	22	0.004118	0.733333
0.002450907376658929	GO:BP	GO:0045104	intermediate filament cytoskeleton organization	51	5343	32	0.005989	0.627451
0.002462485657980813	GO:BP	GO:0002263	cell activation involved in immune response	719	5343	272	0.050908	0.378303
0.0024648765334293987	GO:BP	GO:0030201	heparan sulfate proteoglycan metabolic process	32	5343	23	0.004305	0.71875
0.002507767730534409	GO:BP	GO:0006417	regulation of translation	454	5343	182	0.034063	0.400881
0.002507794868774083	GO:BP	GO:0031098	stress-activated protein kinase signaling cascade	303	5343	129	0.024144	0.425743
0.002513196805950137	GO:BP	GO:0006636	unsaturated fatty acid biosynthetic process	60	5343	36	0.006738	0.6
0.002513196805950137	GO:BP	GO:0010965	regulation of mitotic sister chromatid separation	60	5343	36	0.006738	0.6
0.0025217542629465185	GO:BP	GO:0016126	sterol biosynthetic process	81	5343	45	0.008422	0.555556
0.002523731538155123	GO:BP	GO:0032479	regulation of type I interferon production	128	5343	64	0.011978	0.5
0.0025572240910133647	GO:BP	GO:0001666	response to hypoxia	368	5343	152	0.028448	0.413043
0.002654338946700076	GO:BP	GO:0045089	positive regulation of innate immune response	207	5343	94	0.017593	0.454106
0.002674811179177638	GO:BP	GO:0044774	mitotic DNA integrity checkpoint	108	5343	56	0.010481	0.518519
0.002674811179177638	GO:BP	GO:0006900	vesicle budding from membrane	108	5343	56	0.010481	0.518519
0.0026768711570266703	GO:BP	GO:0006275	regulation of DNA replication	113	5343	58	0.010855	0.513274
0.0027008241313944067	GO:BP	GO:0030097	hemopoiesis	946	5343	347	0.064945	0.366808
0.002728631690203279	GO:BP	GO:0046488	phosphatidylinositol metabolic process	183	5343	85	0.015909	0.464481
0.002767434084185166	GO:BP	GO:0071559	response to transforming growth factor beta	259	5343	113	0.021149	0.436293
0.0029190285864827237	GO:BP	GO:0045595	regulation of cell differentiation	1976	5343	678	0.126895	0.343117
0.0029297157364089783	GO:BP	GO:0007091	metaphase/anaphase transition of mitotic cell cycle	58	5343	35	0.006551	0.603448
0.002955977076215613	GO:BP	GO:1901992	positive regulation of mitotic cell cycle phase transition	91	5343	49	0.009171	0.538462
0.00307522475489413	GO:BP	GO:0009308	amine metabolic process	144	5343	70	0.013101	0.486111
0.003198284677387329	GO:BP	GO:0002366	leukocyte activation involved in immune response	715	5343	270	0.050533	0.377622
0.003208968933360241	GO:BP	GO:0006670	sphingosine metabolic process	19	5343	16	0.002995	0.842105
0.003230853176926586	GO:BP	GO:0104004	cellular response to environmental stimulus	338	5343	141	0.02639	0.41716
0.003230853176926586	GO:BP	GO:0071214	cellular response to abiotic stimulus	338	5343	141	0.02639	0.41716
0.0032354994713399005	GO:BP	GO:0048524	positive regulation of viral process	106	5343	55	0.010294	0.518868
0.0032354994713399005	GO:BP	GO:0008630	intrinsic apoptotic signaling pathway in response to DNA damage	106	5343	55	0.010294	0.518868
0.0032731242258057986	GO:BP	GO:0046903	secretion	1625	5343	566	0.105933	0.348308
0.0033068631685043586	GO:BP	GO:0002833	positive regulation of response to biotic stimulus	246	5343	108	0.020213	0.439024
0.003320937219561007	GO:BP	GO:0030104	water homeostasis	84	5343	46	0.008609	0.547619
0.003323759513838755	GO:BP	GO:0002444	myeloid leukocyte mediated immunity	555	5343	216	0.040427	0.389189
0.0034461727283732783	GO:BP	GO:0046940	nucleoside monophosphate phosphorylation	14	5343	13	0.002433	0.928571
0.0034461727283732783	GO:BP	GO:0043173	nucleotide salvage	14	5343	13	0.002433	0.928571
0.003500782889167801	GO:BP	GO:0071901	negative regulation of protein serine/threonine kinase activity	147	5343	71	0.013288	0.482993
0.003703577361188308	GO:BP	GO:0042119	neutrophil activation	500	5343	197	0.036871	0.394
0.003725522313003161	GO:BP	GO:0051306	mitotic sister chromatid separation	63	5343	37	0.006925	0.587302
0.003725522313003161	GO:BP	GO:0031571	mitotic G1 DNA damage checkpoint	63	5343	37	0.006925	0.587302
0.0038078261918467813	GO:BP	GO:0030518	intracellular steroid hormone receptor signaling pathway	119	5343	60	0.01123	0.504202
0.0038548050334776345	GO:BP	GO:0002474	antigen processing and presentation of peptide antigen via MHC class I	99	5343	52	0.009732	0.525253
0.003883745929126683	GO:BP	GO:0009062	fatty acid catabolic process	114	5343	58	0.010855	0.508772
0.004144916792073549	GO:BP	GO:0006261	DNA-dependent DNA replication	158	5343	75	0.014037	0.474684
0.004215106656512686	GO:BP	GO:0043651	linoleic acid metabolic process	21	5343	17	0.003182	0.809524
0.004215106656512686	GO:BP	GO:0048025	negative regulation of mRNA splicing, via spliceosome	21	5343	17	0.003182	0.809524
0.004215106656512686	GO:BP	GO:0034312	diol biosynthetic process	21	5343	17	0.003182	0.809524
0.004322929520051998	GO:BP	GO:0006695	cholesterol biosynthetic process	75	5343	42	0.007861	0.56
0.004322929520051998	GO:BP	GO:1902653	secondary alcohol biosynthetic process	75	5343	42	0.007861	0.56
0.004329608028805056	GO:BP	GO:0018394	peptidyl-lysine acetylation	174	5343	81	0.01516	0.465517
0.004329608028805056	GO:BP	GO:0140056	organelle localization by membrane tethering	174	5343	81	0.01516	0.465517
0.0043694617096772526	GO:BP	GO:0002275	myeloid cell activation involved in immune response	548	5343	213	0.039865	0.388686
0.004369954699944392	GO:BP	GO:0000096	sulfur amino acid metabolic process	41	5343	27	0.005053	0.658537
0.004385027810481926	GO:BP	GO:0070936	protein K48-linked ubiquitination	61	5343	36	0.006738	0.590164
0.0044756779866529815	GO:BP	GO:1990778	protein localization to cell periphery	334	5343	139	0.026015	0.416168
0.004484163400753177	GO:BP	GO:0006513	protein monoubiquitination	68	5343	39	0.007299	0.573529
0.004484163400753177	GO:BP	GO:0002753	cytoplasmic pattern recognition receptor signaling pathway	68	5343	39	0.007299	0.573529
0.0046470805241363424	GO:BP	GO:0045937	positive regulation of phosphate metabolic process	1184	5343	423	0.079169	0.357264
0.0046470805241363424	GO:BP	GO:0010562	positive regulation of phosphorus metabolic process	1184	5343	423	0.079169	0.357264
0.0047026624633360395	GO:BP	GO:0043279	response to alkaloid	112	5343	57	0.010668	0.508929
0.0047260780698868046	GO:BP	GO:0090087	regulation of peptide transport	718	5343	270	0.050533	0.376045
0.004746580067433018	GO:BP	GO:0019395	fatty acid oxidation	107	5343	55	0.010294	0.514019
0.004764275519527982	GO:BP	GO:0033209	tumor necrosis factor-mediated signaling pathway	177	5343	82	0.015347	0.463277
0.00479096087903906	GO:BP	GO:0001738	morphogenesis of a polarized epithelium	148	5343	71	0.013288	0.47973
0.004790972915891885	GO:BP	GO:0042590	antigen processing and presentation of exogenous peptide antigen via MHC class I	80	5343	44	0.008235	0.55
0.004822824246146061	GO:BP	GO:0048863	stem cell differentiation	267	5343	115	0.021523	0.430712
0.0050306876257847424	GO:BP	GO:0019585	glucuronate metabolic process	23	5343	18	0.003369	0.782609
0.0050306876257847424	GO:BP	GO:0006297	nucleotide-excision repair, DNA gap filling	23	5343	18	0.003369	0.782609
0.0050306876257847424	GO:BP	GO:0006063	uronic acid metabolic process	23	5343	18	0.003369	0.782609
0.005106965654553532	GO:BP	GO:1903506	regulation of nucleic acid-templated transcription	3539	5343	1163	0.217668	0.328624
0.005135909441337568	GO:BP	GO:0032989	cellular component morphogenesis	812	5343	301	0.056335	0.37069
0.0051517038824053065	GO:BP	GO:0046605	regulation of centrosome cycle	59	5343	35	0.006551	0.59322
0.0051517038824053065	GO:BP	GO:0033260	nuclear DNA replication	59	5343	35	0.006551	0.59322
0.0052504438920734494	GO:BP	GO:0019674	NAD metabolic process	50	5343	31	0.005802	0.62
0.0053111478641983435	GO:BP	GO:0000904	cell morphogenesis involved in differentiation	764	5343	285	0.053341	0.373037
0.005552115646475778	GO:BP	GO:0051443	positive regulation of ubiquitin-protein transferase activity	35	5343	24	0.004492	0.685714
0.005673281931925021	GO:BP	GO:2001141	regulation of RNA biosynthetic process	3544	5343	1164	0.217855	0.328442
0.005696887824538537	GO:BP	GO:0006475	internal protein amino acid acetylation	167	5343	78	0.014599	0.467066
0.0057413958241127536	GO:BP	GO:0045936	negative regulation of phosphate metabolic process	612	5343	234	0.043796	0.382353
0.0059770154368089185	GO:BP	GO:0036230	granulocyte activation	506	5343	198	0.037058	0.391304
0.00603450192310651	GO:BP	GO:0006221	pyrimidine nucleotide biosynthetic process	31	5343	22	0.004118	0.709677
0.006043478065540533	GO:BP	GO:0009267	cellular response to starvation	154	5343	73	0.013663	0.474026
0.006060897105336402	GO:BP	GO:1903052	positive regulation of proteolysis involved in cellular protein catabolic process	128	5343	63	0.011791	0.492188
0.006127200026868337	GO:BP	GO:0060070	canonical Wnt signaling pathway	347	5343	143	0.026764	0.412104
0.00617430891722887	GO:BP	GO:0033047	regulation of mitotic sister chromatid segregation	71	5343	40	0.007486	0.56338
0.006191929454034479	GO:BP	GO:0009416	response to light stimulus	330	5343	137	0.025641	0.415152
0.006264956082413929	GO:BP	GO:0036294	cellular response to decreased oxygen levels	224	5343	99	0.018529	0.441964
0.0062836728372165284	GO:BP	GO:0034250	positive regulation of cellular amide metabolic process	170	5343	79	0.014786	0.464706
0.006314092873569729	GO:BP	GO:0044819	mitotic G1/S transition checkpoint	64	5343	37	0.006925	0.578125
0.006320832983348877	GO:BP	GO:0006206	pyrimidine nucleobase metabolic process	16	5343	14	0.00262	0.875
0.006594121803365843	GO:BP	GO:0010563	negative regulation of phosphorus metabolic process	613	5343	234	0.043796	0.381729
0.00676494697394584	GO:BP	GO:0050793	regulation of developmental process	2833	5343	943	0.176493	0.332863
0.00686389665099127	GO:BP	GO:0006220	pyrimidine nucleotide metabolic process	46	5343	29	0.005428	0.630435
0.007268588319128014	GO:BP	GO:0048511	rhythmic process	311	5343	130	0.024331	0.418006
0.007338438676907262	GO:BP	GO:0001736	establishment of planar polarity	126	5343	62	0.011604	0.492063
0.007338438676907262	GO:BP	GO:0007164	establishment of tissue polarity	126	5343	62	0.011604	0.492063
0.00745086290982362	GO:BP	GO:0031668	cellular response to extracellular stimulus	244	5343	106	0.019839	0.434426
0.0077860805846900905	GO:BP	GO:1901659	glycosyl compound biosynthetic process	44	5343	28	0.005241	0.636364
0.007970712092375131	GO:BP	GO:0034754	cellular hormone metabolic process	134	5343	65	0.012165	0.485075
0.008276650823119295	GO:BP	GO:0051092	positive regulation of NF-kappaB transcription factor activity	163	5343	76	0.014224	0.466258
0.008448819409725934	GO:BP	GO:0001934	positive regulation of protein phosphorylation	1039	5343	374	0.069998	0.359962
0.008697411510318963	GO:BP	GO:0033674	positive regulation of kinase activity	618	5343	235	0.043983	0.380259
0.008776361656969234	GO:BP	GO:0019985	translesion synthesis	42	5343	27	0.005053	0.642857
0.008845613789442475	GO:BP	GO:0044784	metaphase/anaphase transition of cell cycle	60	5343	35	0.006551	0.583333
0.008931430422918359	GO:BP	GO:0006338	chromatin remodeling	220	5343	97	0.018155	0.440909
0.00916560086453169	GO:BP	GO:0051090	regulation of DNA-binding transcription factor activity	459	5343	181	0.033876	0.394336
0.009172050669691284	GO:BP	GO:1904872	regulation of telomerase RNA localization to Cajal body	18	5343	15	0.002807	0.833333
0.009172050669691284	GO:BP	GO:0070200	establishment of protein localization to telomere	18	5343	15	0.002807	0.833333
0.009172050669691284	GO:BP	GO:0042772	DNA damage response, signal transduction resulting in transcription	18	5343	15	0.002807	0.833333
0.009172050669691284	GO:BP	GO:0046112	nucleobase biosynthetic process	18	5343	15	0.002807	0.833333
0.009292688138602576	GO:BP	GO:0006757	ATP generation from ADP	119	5343	59	0.011042	0.495798
0.00946684038983771	GO:BP	GO:0007050	cell cycle arrest	234	5343	102	0.01909	0.435897
0.009589725490965866	GO:BP	GO:0031648	protein destabilization	51	5343	31	0.005802	0.607843
0.009636558251542237	GO:BP	GO:0051091	positive regulation of DNA-binding transcription factor activity	273	5343	116	0.021711	0.424908
0.009645511299675063	GO:BP	GO:0051225	spindle assembly	114	5343	57	0.010668	0.5
0.00982022957479207	GO:BP	GO:1901658	glycosyl compound catabolic process	40	5343	26	0.004866	0.65
0.00982022957479207	GO:BP	GO:0044003	modulation by symbiont of host process	40	5343	26	0.004866	0.65
0.010143859093815849	GO:BP	GO:0034308	primary alcohol metabolic process	94	5343	49	0.009171	0.521277
0.010297728077487493	GO:BP	GO:0060627	regulation of vesicle-mediated transport	545	5343	210	0.039304	0.385321
0.010446137871264484	GO:BP	GO:0070534	protein K63-linked ubiquitination	58	5343	34	0.006363	0.586207
0.010482138246581521	GO:BP	GO:1905818	regulation of chromosome separation	65	5343	37	0.006925	0.569231
0.010831494837353932	GO:BP	GO:0042761	very long-chain fatty acid biosynthetic process	13	5343	12	0.002246	0.923077
0.010831494837353932	GO:BP	GO:0046349	amino sugar biosynthetic process	13	5343	12	0.002246	0.923077
0.01084842776146315	GO:BP	GO:0014823	response to activity	77	5343	42	0.007861	0.545455
0.01089448613710738	GO:BP	GO:0006084	acetyl-CoA metabolic process	38	5343	25	0.004679	0.657895
0.011120112439959846	GO:BP	GO:0051972	regulation of telomerase activity	49	5343	30	0.005615	0.612245
0.011321853858990968	GO:BP	GO:0007623	circadian rhythm	221	5343	97	0.018155	0.438914
0.011491888314416832	GO:BP	GO:0043401	steroid hormone mediated signaling pathway	143	5343	68	0.012727	0.475524
0.011649927217146043	GO:BP	GO:0022407	regulation of cell-cell adhesion	443	5343	175	0.032753	0.395034
0.011761381453314035	GO:BP	GO:0007179	transforming growth factor beta receptor signaling pathway	202	5343	90	0.016844	0.445545
0.011761381453314035	GO:BP	GO:0030705	cytoskeleton-dependent intracellular transport	202	5343	90	0.016844	0.445545
0.0119649095201162	GO:BP	GO:0051973	positive regulation of telomerase activity	36	5343	24	0.004492	0.666667
0.012314909580144391	GO:BP	GO:0030071	regulation of mitotic metaphase/anaphase transition	56	5343	33	0.006176	0.589286
0.012364662210466223	GO:BP	GO:0072329	monocarboxylic acid catabolic process	138	5343	66	0.012353	0.478261
0.012575498409061449	GO:BP	GO:0006473	protein acetylation	205	5343	91	0.017032	0.443902
0.012721817467624184	GO:BP	GO:0010810	regulation of cell-substrate adhesion	216	5343	95	0.01778	0.439815
0.01307350290330972	GO:BP	GO:0006188	IMP biosynthetic process	10	5343	10	0.001872	1.0
0.013246278414102858	GO:BP	GO:0019751	polyol metabolic process	133	5343	64	0.011978	0.481203
0.01341633590452994	GO:BP	GO:0097191	extrinsic apoptotic signaling pathway	230	5343	100	0.018716	0.434783
0.014298089006231359	GO:BP	GO:0030030	cell projection organization	1608	5343	555	0.103874	0.345149
0.014494573681519834	GO:BP	GO:0018393	internal peptidyl-lysine acetylation	165	5343	76	0.014224	0.460606
0.014514023463742084	GO:BP	GO:0009218	pyrimidine ribonucleotide metabolic process	24	5343	18	0.003369	0.75
0.014518051258926475	GO:BP	GO:0033238	regulation of cellular amine metabolic process	85	5343	45	0.008422	0.529412
0.014847638435498184	GO:BP	GO:0007044	cell-substrate junction assembly	100	5343	51	0.009545	0.51
0.014847638435498184	GO:BP	GO:2001243	negative regulation of intrinsic apoptotic signaling pathway	100	5343	51	0.009545	0.51
0.014850248761120234	GO:BP	GO:1903902	positive regulation of viral life cycle	61	5343	35	0.006551	0.57377
0.014910351895274771	GO:BP	GO:0050896	response to stimulus	9430	5343	2931	0.548568	0.310817
0.01496380340403473	GO:BP	GO:0010038	response to metal ion	372	5343	150	0.028074	0.403226
0.015178095107458644	GO:BP	GO:0071456	cellular response to hypoxia	214	5343	94	0.017593	0.439252
0.015510886092736566	GO:BP	GO:0045471	response to ethanol	144	5343	68	0.012727	0.472222
0.01578319459366603	GO:BP	GO:0006096	glycolytic process	118	5343	58	0.010855	0.491525
0.015926674824521637	GO:BP	GO:0016573	histone acetylation	160	5343	74	0.01385	0.4625
0.01592869804311569	GO:BP	GO:0071560	cellular response to transforming growth factor beta stimulus	253	5343	108	0.020213	0.426877
0.016331368273347552	GO:BP	GO:0032940	secretion by cell	1484	5343	515	0.096388	0.347035
0.016758827834349614	GO:BP	GO:0051222	positive regulation of protein transport	390	5343	156	0.029197	0.4
0.0167947045247321	GO:BP	GO:0072332	intrinsic apoptotic signaling pathway by p53 class mediator	78	5343	42	0.007861	0.538462
0.0167947045247321	GO:BP	GO:0032481	positive regulation of type I interferon production	78	5343	42	0.007861	0.538462
0.017012139089593082	GO:BP	GO:0006693	prostaglandin metabolic process	52	5343	31	0.005802	0.596154
0.017012139089593082	GO:BP	GO:0006692	prostanoid metabolic process	52	5343	31	0.005802	0.596154
0.017229898375573774	GO:BP	GO:0034614	cellular response to reactive oxygen species	171	5343	78	0.014599	0.45614
0.017506206957076845	GO:BP	GO:0043405	regulation of MAP kinase activity	347	5343	141	0.02639	0.40634
0.017646568096113074	GO:BP	GO:0072413	signal transduction involved in mitotic cell cycle checkpoint	59	5343	34	0.006363	0.576271
0.017646568096113074	GO:BP	GO:1902403	signal transduction involved in mitotic DNA integrity checkpoint	59	5343	34	0.006363	0.576271
0.017646568096113074	GO:BP	GO:1902402	signal transduction involved in mitotic DNA damage checkpoint	59	5343	34	0.006363	0.576271
0.017646568096113074	GO:BP	GO:0019369	arachidonic acid metabolic process	59	5343	34	0.006363	0.576271
0.017659457620681215	GO:BP	GO:0098869	cellular oxidant detoxification	103	5343	52	0.009732	0.504854
0.01810745093264297	GO:BP	GO:0031058	positive regulation of histone modification	93	5343	48	0.008984	0.516129
0.01829885721385582	GO:BP	GO:0120036	plasma membrane bounded cell projection organization	1567	5343	541	0.101254	0.345246
0.01863067539959128	GO:BP	GO:0006355	regulation of transcription, DNA-templated	3467	5343	1134	0.21224	0.327084
0.01868784588516131	GO:BP	GO:0009653	anatomical structure morphogenesis	2849	5343	943	0.176493	0.330993
0.018754624938606683	GO:BP	GO:0009129	pyrimidine nucleoside monophosphate metabolic process	15	5343	13	0.002433	0.866667
0.018754624938606683	GO:BP	GO:0006646	phosphatidylethanolamine biosynthetic process	15	5343	13	0.002433	0.866667
0.018754624938606683	GO:BP	GO:0000463	maturation of LSU-rRNA from tricistronic rRNA transcript (SSU-rRNA, 5.8S rRNA, LSU-rRNA)	15	5343	13	0.002433	0.866667
0.01884974632404892	GO:BP	GO:0048872	homeostasis of number of cells	265	5343	112	0.020962	0.422642
0.020221888174459787	GO:BP	GO:0007033	vacuole organization	177	5343	80	0.014973	0.451977
0.020550866343062017	GO:BP	GO:0033500	carbohydrate homeostasis	257	5343	109	0.020401	0.424125
0.020942966107518016	GO:BP	GO:0072431	signal transduction involved in mitotic G1 DNA damage checkpoint	57	5343	33	0.006176	0.578947
0.020942966107518016	GO:BP	GO:1902400	intracellular signal transduction involved in G1 DNA damage checkpoint	57	5343	33	0.006176	0.578947
0.020988706961366697	GO:BP	GO:0001890	placenta development	161	5343	74	0.01385	0.459627
0.020988706961366697	GO:BP	GO:2001236	regulation of extrinsic apoptotic signaling pathway	161	5343	74	0.01385	0.459627
0.021402345630912745	GO:BP	GO:0044773	mitotic DNA damage checkpoint	101	5343	51	0.009545	0.50495
0.021868845729544187	GO:BP	GO:0032259	methylation	380	5343	152	0.028448	0.4
0.022446111696401292	GO:BP	GO:0009408	response to heat	172	5343	78	0.014599	0.453488
0.022854123432892462	GO:BP	GO:2000377	regulation of reactive oxygen species metabolic process	202	5343	89	0.016657	0.440594
0.02425626422918113	GO:BP	GO:0060071	Wnt signaling pathway, planar cell polarity pathway	109	5343	54	0.010107	0.495413
0.024425322626999875	GO:BP	GO:0006635	fatty acid beta-oxidation	74	5343	40	0.007486	0.540541
0.024425322626999875	GO:BP	GO:0015909	long-chain fatty acid transport	74	5343	40	0.007486	0.540541
0.02447023204863676	GO:BP	GO:0070423	nucleotide-binding oligomerization domain containing signaling pathway	37	5343	24	0.004492	0.648649
0.02447023204863676	GO:BP	GO:0033762	response to glucagon	37	5343	24	0.004492	0.648649
0.02513156190259087	GO:BP	GO:0051049	regulation of transport	1887	5343	641	0.11997	0.339693
0.02551999507552246	GO:BP	GO:0007169	transmembrane receptor protein tyrosine kinase signaling pathway	762	5343	280	0.052405	0.367454
0.02595592321804659	GO:BP	GO:0000097	sulfur amino acid biosynthetic process	17	5343	14	0.00262	0.823529
0.02595592321804659	GO:BP	GO:0006978	DNA damage response, signal transduction by p53 class mediator resulting in transcription of p21 class mediator	17	5343	14	0.00262	0.823529
0.02709463766615197	GO:BP	GO:0051204	protein insertion into mitochondrial membrane	46	5343	28	0.005241	0.608696
0.02722784110433332	GO:BP	GO:0046685	response to arsenic-containing substance	35	5343	23	0.004305	0.657143
0.02722784110433332	GO:BP	GO:0006658	phosphatidylserine metabolic process	35	5343	23	0.004305	0.657143
0.027261691746353702	GO:BP	GO:0046824	positive regulation of nucleocytoplasmic transport	67	5343	37	0.006925	0.552239
0.027261691746353702	GO:BP	GO:0036498	IRE1-mediated unfolded protein response	67	5343	37	0.006925	0.552239
0.027261691746353702	GO:BP	GO:0051298	centrosome duplication	67	5343	37	0.006925	0.552239
0.0278035293664011	GO:BP	GO:0008203	cholesterol metabolic process	154	5343	71	0.013288	0.461039
0.028056116170783088	GO:BP	GO:0090175	regulation of establishment of planar polarity	112	5343	55	0.010294	0.491071
0.02876965691197007	GO:BP	GO:0007254	JNK cascade	214	5343	93	0.017406	0.434579
0.029097311689686444	GO:BP	GO:0071356	cellular response to tumor necrosis factor	304	5343	125	0.023395	0.411184
0.029368543111803976	GO:BP	GO:1990090	cellular response to nerve growth factor stimulus	53	5343	31	0.005802	0.584906
0.029396431583975025	GO:BP	GO:2001022	positive regulation of response to DNA damage stimulus	107	5343	53	0.00992	0.495327
0.029449529973428833	GO:BP	GO:0042274	ribosomal small subunit biogenesis	72	5343	39	0.007299	0.541667
0.02973713628343208	GO:BP	GO:0034612	response to tumor necrosis factor	327	5343	133	0.024892	0.406728
0.029899770475317843	GO:BP	GO:0042593	glucose homeostasis	256	5343	108	0.020213	0.421875
0.02997423379836525	GO:BP	GO:0006691	leukotriene metabolic process	33	5343	22	0.004118	0.666667
0.03001598470718748	GO:BP	GO:0016197	endosomal transport	242	5343	103	0.019278	0.42562
0.03012773245360235	GO:BP	GO:1905330	regulation of morphogenesis of an epithelium	184	5343	82	0.015347	0.445652
0.030402945701818444	GO:BP	GO:0007249	I-kappaB kinase/NF-kappaB signaling	290	5343	120	0.022459	0.413793
0.030539439583933126	GO:BP	GO:0007034	vacuolar transport	149	5343	69	0.012914	0.463087
0.03054896119540618	GO:BP	GO:0015908	fatty acid transport	102	5343	51	0.009545	0.5
0.031204254323143582	GO:BP	GO:0042060	wound healing	547	5343	208	0.038929	0.380256
0.03134217544649405	GO:BP	GO:0051099	positive regulation of binding	176	5343	79	0.014786	0.448864
0.03153360718093271	GO:BP	GO:0090671	telomerase RNA localization to Cajal body	19	5343	15	0.002807	0.789474
0.03153360718093271	GO:BP	GO:0090672	telomerase RNA localization	19	5343	15	0.002807	0.789474
0.03153360718093271	GO:BP	GO:0090685	RNA localization to nucleus	19	5343	15	0.002807	0.789474
0.03153360718093271	GO:BP	GO:0016137	glycoside metabolic process	19	5343	15	0.002807	0.789474
0.03153360718093271	GO:BP	GO:0090670	RNA localization to Cajal body	19	5343	15	0.002807	0.789474
0.03153360718093271	GO:BP	GO:0019054	modulation by virus of host cellular process	19	5343	15	0.002807	0.789474
0.03192901548562368	GO:BP	GO:0018210	peptidyl-threonine modification	128	5343	61	0.011417	0.476562
0.032182130325609036	GO:BP	GO:1903312	negative regulation of mRNA metabolic process	87	5343	45	0.008422	0.517241
0.032574753890263916	GO:BP	GO:0019048	modulation by virus of host process	31	5343	21	0.00393	0.677419
0.032743508175445885	GO:BP	GO:0006521	regulation of cellular amino acid metabolic process	65	5343	36	0.006738	0.553846
0.03399300789280218	GO:BP	GO:1901800	positive regulation of proteasomal protein catabolic process	110	5343	54	0.010107	0.490909
0.034179823002702926	GO:BP	GO:0032990	cell part morphogenesis	716	5343	264	0.04941	0.368715
0.03468874350582321	GO:BP	GO:0042220	response to cocaine	51	5343	30	0.005615	0.588235
0.034798779379372764	GO:BP	GO:1902099	regulation of metaphase/anaphase transition of cell cycle	58	5343	33	0.006176	0.568966
0.03571599556425338	GO:BP	GO:0072593	reactive oxygen species metabolic process	288	5343	119	0.022272	0.413194
0.03589352938098978	GO:BP	GO:0010970	transport along microtubule	163	5343	74	0.01385	0.453988
0.0363152656218111	GO:BP	GO:1903146	regulation of autophagy of mitochondrion	42	5343	26	0.004866	0.619048
0.03703556377467199	GO:BP	GO:1901655	cellular response to ketone	100	5343	50	0.009358	0.5
0.037070331836863236	GO:BP	GO:0000715	nucleotide-excision repair, DNA damage recognition	23	5343	17	0.003182	0.73913
0.037070331836863236	GO:BP	GO:0046058	cAMP metabolic process	23	5343	17	0.003182	0.73913
0.037070331836863236	GO:BP	GO:0034063	stress granule assembly	23	5343	17	0.003182	0.73913
0.03885051673018378	GO:BP	GO:0043112	receptor metabolic process	196	5343	86	0.016096	0.438776
0.039800264595050185	GO:BP	GO:0042177	negative regulation of protein catabolic process	134	5343	63	0.011791	0.470149
0.040890399738159534	GO:BP	GO:0009395	phospholipid catabolic process	49	5343	29	0.005428	0.591837
0.040890399738159534	GO:BP	GO:2000059	negative regulation of ubiquitin-dependent protein catabolic process	49	5343	29	0.005428	0.591837
0.04117610422843916	GO:BP	GO:0006694	steroid biosynthetic process	199	5343	87	0.016283	0.437186
0.04119054200718582	GO:BP	GO:0006024	glycosaminoglycan biosynthetic process	108	5343	53	0.00992	0.490741
0.04149369385582833	GO:BP	GO:0006977	DNA damage response, signal transduction by p53 class mediator resulting in cell cycle arrest	56	5343	32	0.005989	0.571429
0.04149369385582833	GO:BP	GO:1990089	response to nerve growth factor	56	5343	32	0.005989	0.571429
0.04318614806547709	GO:BP	GO:0009063	cellular amino acid catabolic process	129	5343	61	0.011417	0.472868
0.043190589701386436	GO:BP	GO:0051817	modulation of process of other organism involved in symbiotic interaction	103	5343	51	0.009545	0.495146
0.04413716540734933	GO:BP	GO:0051121	hepoxilin metabolic process	9	5343	9	0.001684	1.0
0.04413716540734933	GO:BP	GO:0018243	protein O-linked glycosylation via threonine	9	5343	9	0.001684	1.0
0.04413716540734933	GO:BP	GO:0051122	hepoxilin biosynthetic process	9	5343	9	0.001684	1.0
0.04432282074093828	GO:BP	GO:0070585	protein localization to mitochondrion	145	5343	67	0.01254	0.462069
0.046674431538847434	GO:BP	GO:0033143	regulation of intracellular steroid hormone receptor signaling pathway	78	5343	41	0.007674	0.525641
0.046674431538847434	GO:BP	GO:0030433	ubiquitin-dependent ERAD pathway	78	5343	41	0.007674	0.525641
0.0468645079567788	GO:BP	GO:0048468	cell development	2237	5343	748	0.139996	0.334376
0.04705275923301845	GO:BP	GO:0032436	positive regulation of proteasomal ubiquitin-dependent protein catabolic process	88	5343	45	0.008422	0.511364
0.04716953892826135	GO:BP	GO:0046128	purine ribonucleoside metabolic process	61	5343	34	0.006363	0.557377
0.047742939325544485	GO:BP	GO:0035872	nucleotide-binding domain, leucine rich repeat containing receptor signaling pathway	38	5343	24	0.004492	0.631579
0.048061749916080164	GO:BP	GO:0006302	double-strand break repair	264	5343	110	0.020588	0.416667
0.04809082518481615	GO:BP	GO:0045023	G0 to G1 transition	47	5343	28	0.005241	0.595745
0.048255313235711264	GO:BP	GO:0040007	growth	1004	5343	357	0.066816	0.355578
0.048502810039340434	GO:BP	GO:0008286	insulin receptor signaling pathway	148	5343	68	0.012727	0.459459
0.049225536787556264	GO:BP	GO:0043543	protein acylation	250	5343	105	0.019652	0.42
3.847664629852714e-256	GO:CC	GO:0005622	intracellular	14752	5461	5071	0.928585	0.34375
2.2793683085077225e-220	GO:CC	GO:0005737	cytoplasm	11817	5461	4339	0.794543	0.367183
3.819327400736618e-194	GO:CC	GO:0043227	membrane-bounded organelle	12800	5461	4529	0.829335	0.353828
7.367924215633568e-190	GO:CC	GO:0043226	organelle	13927	5461	4786	0.876396	0.343649
4.9100097026939206e-189	GO:CC	GO:0043229	intracellular organelle	12992	5461	4565	0.835927	0.35137
3.62014540478876e-184	GO:CC	GO:0043231	intracellular membrane-bounded organelle	11194	5461	4100	0.750778	0.366268
2.4468800916086427e-183	GO:CC	GO:0005829	cytosol	5223	5461	2333	0.427211	0.446678
2.1179047262150703e-139	GO:CC	GO:0070013	intracellular organelle lumen	5926	5461	2452	0.449002	0.41377
2.1179047262150703e-139	GO:CC	GO:0043233	organelle lumen	5926	5461	2452	0.449002	0.41377
2.1179047262150703e-139	GO:CC	GO:0031974	membrane-enclosed lumen	5926	5461	2452	0.449002	0.41377
4.790816799635249e-127	GO:CC	GO:0005654	nucleoplasm	4026	5461	1795	0.328694	0.445852
1.3763442355601501e-105	GO:CC	GO:0031981	nuclear lumen	4805	5461	1996	0.365501	0.415401
1.2987433766234461e-102	GO:CC	GO:0032991	protein-containing complex	5516	5461	2216	0.405786	0.40174
4.891386795705476e-101	GO:CC	GO:0005634	nucleus	7556	5461	2840	0.520051	0.37586
3.6788592288308234e-75	GO:CC	GO:0043228	non-membrane-bounded organelle	5032	5461	1972	0.361106	0.391892
4.809931624399266e-75	GO:CC	GO:0043232	intracellular non-membrane-bounded organelle	5027	5461	1970	0.36074	0.391884
1.8191472316295257e-70	GO:CC	GO:1902494	catalytic complex	1400	5461	712	0.130379	0.508571
1.2624037053282064e-68	GO:CC	GO:1990904	ribonucleoprotein complex	688	5461	419	0.076726	0.609012
3.4474498233334663e-46	GO:CC	GO:0070062	extracellular exosome	2143	5461	916	0.167735	0.427438
7.035412508175526e-41	GO:CC	GO:0031090	organelle membrane	3593	5461	1379	0.252518	0.383802
5.998643594456831e-38	GO:CC	GO:0012505	endomembrane system	4607	5461	1688	0.309101	0.366399
9.677562206614646e-38	GO:CC	GO:0043230	extracellular organelle	2249	5461	923	0.169017	0.410405
1.1729075113988455e-37	GO:CC	GO:1903561	extracellular vesicle	2244	5461	921	0.16865	0.410428
4.489677726871671e-35	GO:CC	GO:0005739	mitochondrion	1659	5461	711	0.130196	0.428571
1.1070813790103044e-33	GO:CC	GO:0031982	vesicle	4036	5461	1488	0.272478	0.368682
4.735550066637877e-31	GO:CC	GO:0016604	nuclear body	793	5461	386	0.070683	0.486759
1.7003296588197653e-30	GO:CC	GO:0005759	mitochondrial matrix	480	5461	262	0.047977	0.545833
8.734951481643058e-29	GO:CC	GO:0044391	ribosomal subunit	190	5461	132	0.024171	0.694737
1.519453031923722e-27	GO:CC	GO:1990234	transferase complex	799	5461	379	0.069401	0.474343
1.711244339378997e-27	GO:CC	GO:0005730	nucleolus	932	5461	428	0.078374	0.459227
3.315964973081113e-27	GO:CC	GO:0005840	ribosome	246	5461	156	0.028566	0.634146
2.3266517291876875e-24	GO:CC	GO:0031967	organelle envelope	1243	5461	529	0.096869	0.425583
2.3266517291876875e-24	GO:CC	GO:0031975	envelope	1243	5461	529	0.096869	0.425583
4.097393756509771e-23	GO:CC	GO:0015630	microtubule cytoskeleton	1273	5461	535	0.097967	0.420267
1.5927300278817943e-22	GO:CC	GO:0005925	focal adhesion	418	5461	220	0.040286	0.526316
1.9453120514542216e-22	GO:CC	GO:0030055	cell-substrate junction	426	5461	223	0.040835	0.523474
2.0892087919304922e-22	GO:CC	GO:0005813	centrosome	591	5461	287	0.052554	0.485618
4.9481252358242515e-21	GO:CC	GO:0005856	cytoskeleton	2291	5461	867	0.158762	0.378437
4.9679936382203017e-20	GO:CC	GO:0005815	microtubule organizing center	785	5461	352	0.064457	0.448408
5.155683477564034e-20	GO:CC	GO:0071013	catalytic step 2 spliceosome	85	5461	68	0.012452	0.8
8.518849860584072e-20	GO:CC	GO:0005681	spliceosomal complex	190	5461	119	0.021791	0.626316
1.118594872696667e-19	GO:CC	GO:0016607	nuclear speck	404	5461	208	0.038088	0.514851
1.7287726450614408e-19	GO:CC	GO:0042175	nuclear outer membrane-endoplasmic reticulum membrane network	1124	5461	470	0.086065	0.418149
3.7861892247770864e-18	GO:CC	GO:0005789	endoplasmic reticulum membrane	1101	5461	457	0.083684	0.415077
4.520631559194909e-18	GO:CC	GO:0099080	supramolecular complex	1327	5461	534	0.097784	0.402411
3.7150123207914224e-17	GO:CC	GO:0098687	chromosomal region	358	5461	184	0.033693	0.513966
5.3666074412410184e-17	GO:CC	GO:0022626	cytosolic ribosome	109	5461	77	0.0141	0.706422
1.0529907578872028e-16	GO:CC	GO:0015934	large ribosomal subunit	118	5461	81	0.014832	0.686441
1.2024028376203792e-16	GO:CC	GO:0048471	perinuclear region of cytoplasm	729	5461	321	0.05878	0.440329
1.6179595223120312e-16	GO:CC	GO:0070161	anchoring junction	840	5461	360	0.065922	0.428571
2.509662897225351e-16	GO:CC	GO:0005783	endoplasmic reticulum	1838	5461	696	0.127449	0.378672
3.025402701257237e-15	GO:CC	GO:0098588	bounding membrane of organelle	2139	5461	788	0.144296	0.368396
3.046626706561174e-15	GO:CC	GO:0005819	spindle	375	5461	186	0.03406	0.496
5.129377585993939e-14	GO:CC	GO:0005694	chromosome	1770	5461	662	0.121223	0.374011
1.2701798508935212e-13	GO:CC	GO:0098798	mitochondrial protein complex	270	5461	141	0.025819	0.522222
1.4180644050896e-13	GO:CC	GO:0000151	ubiquitin ligase complex	293	5461	150	0.027467	0.511945
2.2304712901999218e-13	GO:CC	GO:0031966	mitochondrial membrane	744	5461	315	0.057682	0.423387
4.409540442880873e-13	GO:CC	GO:0005740	mitochondrial envelope	793	5461	331	0.060612	0.417402
2.2104807274679613e-12	GO:CC	GO:0005794	Golgi apparatus	1603	5461	599	0.109687	0.373674
3.810996521563425e-12	GO:CC	GO:0015935	small ribosomal subunit	75	5461	54	0.009888	0.72
7.141629912520034e-12	GO:CC	GO:0000313	organellar ribosome	88	5461	60	0.010987	0.681818
7.141629912520034e-12	GO:CC	GO:0005761	mitochondrial ribosome	88	5461	60	0.010987	0.681818
2.0627396411743422e-11	GO:CC	GO:0035770	ribonucleoprotein granule	245	5461	126	0.023073	0.514286
2.962791585077835e-11	GO:CC	GO:0005635	nuclear envelope	475	5461	212	0.038821	0.446316
4.0290898480031546e-11	GO:CC	GO:0000139	Golgi membrane	766	5461	314	0.057499	0.409922
9.925080766783192e-11	GO:CC	GO:0005743	mitochondrial inner membrane	502	5461	220	0.040286	0.438247
1.0531450066498789e-10	GO:CC	GO:0036464	cytoplasmic ribonucleoprotein granule	234	5461	120	0.021974	0.512821
1.4870201066091364e-10	GO:CC	GO:0005684	U2-type spliceosomal complex	92	5461	60	0.010987	0.652174
2.4589119669857875e-10	GO:CC	GO:0031410	cytoplasmic vesicle	2419	5461	847	0.1551	0.350145
3.4270986055537247e-10	GO:CC	GO:0098805	whole membrane	1731	5461	628	0.114997	0.362796
3.7432055338382086e-10	GO:CC	GO:0097708	intracellular vesicle	2423	5461	847	0.1551	0.349567
7.044127729862902e-10	GO:CC	GO:0019866	organelle inner membrane	564	5461	239	0.043765	0.423759
7.495316090533758e-10	GO:CC	GO:0120114	Sm-like protein family complex	75	5461	51	0.009339	0.68
8.54712933448966e-10	GO:CC	GO:0030496	midbody	184	5461	98	0.017945	0.532609
9.726297989829367e-10	GO:CC	GO:0022625	cytosolic large ribosomal subunit	57	5461	42	0.007691	0.736842
1.0644533270848316e-09	GO:CC	GO:0000775	chromosome, centromeric region	202	5461	105	0.019227	0.519802
1.2661004050684188e-09	GO:CC	GO:0071007	U2-type catalytic step 2 spliceosome	30	5461	27	0.004944	0.9
1.9307642162302053e-09	GO:CC	GO:0000118	histone deacetylase complex	72	5461	49	0.008973	0.680556
3.676178883499305e-09	GO:CC	GO:0034399	nuclear periphery	129	5461	74	0.013551	0.573643
4.456897330951775e-09	GO:CC	GO:0000793	condensed chromosome	221	5461	111	0.020326	0.502262
2.2607974742545105e-08	GO:CC	GO:0030054	cell junction	2058	5461	720	0.131844	0.349854
3.308539997370225e-08	GO:CC	GO:0030532	small nuclear ribonucleoprotein complex	63	5461	43	0.007874	0.68254
3.5827493442354886e-08	GO:CC	GO:0101002	ficolin-1-rich granule	124	5461	70	0.012818	0.564516
3.5827493442354886e-08	GO:CC	GO:1904813	ficolin-1-rich granule lumen	124	5461	70	0.012818	0.564516
3.9257382172314984e-08	GO:CC	GO:0097525	spliceosomal snRNP complex	57	5461	40	0.007325	0.701754
9.770006980194483e-08	GO:CC	GO:0010494	cytoplasmic stress granule	73	5461	47	0.008606	0.643836
1.1177825676890972e-07	GO:CC	GO:1990204	oxidoreductase complex	112	5461	64	0.011719	0.571429
1.3923456598071722e-07	GO:CC	GO:0000502	proteasome complex	67	5461	44	0.008057	0.656716
2.1623738881754576e-07	GO:CC	GO:0031461	cullin-RING ubiquitin ligase complex	165	5461	85	0.015565	0.515152
2.6848601320026843e-07	GO:CC	GO:0022627	cytosolic small ribosomal subunit	47	5461	34	0.006226	0.723404
3.278208603653592e-07	GO:CC	GO:0031983	vesicle lumen	326	5461	145	0.026552	0.444785
4.3005101222821226e-07	GO:CC	GO:1905369	endopeptidase complex	73	5461	46	0.008423	0.630137
4.666982213498026e-07	GO:CC	GO:0000922	spindle pole	167	5461	85	0.015565	0.508982
4.821199249433141e-07	GO:CC	GO:0000781	chromosome, telomeric region	162	5461	83	0.015199	0.512346
6.007135051772026e-07	GO:CC	GO:0061695	transferase complex, transferring phosphorus-containing groups	268	5461	123	0.022523	0.458955
6.73350148886151e-07	GO:CC	GO:0005874	microtubule	436	5461	183	0.03351	0.419725
8.038116211487948e-07	GO:CC	GO:0060205	cytoplasmic vesicle lumen	324	5461	143	0.026186	0.441358
8.276563286482237e-07	GO:CC	GO:0099512	supramolecular fiber	1000	5461	372	0.068119	0.372
1.1451355106645436e-06	GO:CC	GO:0000315	organellar large ribosomal subunit	57	5461	38	0.006958	0.666667
1.1451355106645436e-06	GO:CC	GO:0005762	mitochondrial large ribosomal subunit	57	5461	38	0.006958	0.666667
1.15058884773429e-06	GO:CC	GO:0000776	kinetochore	139	5461	73	0.013368	0.52518
1.1848770012054235e-06	GO:CC	GO:0034774	secretory granule lumen	320	5461	141	0.025819	0.440625
1.5971026209290438e-06	GO:CC	GO:0099081	supramolecular polymer	1008	5461	373	0.068303	0.37004
2.61185225556219e-06	GO:CC	GO:0072686	mitotic spindle	136	5461	71	0.013001	0.522059
3.2580751206053682e-06	GO:CC	GO:0071011	precatalytic spliceosome	52	5461	35	0.006409	0.673077
3.4052502718199562e-06	GO:CC	GO:0016363	nuclear matrix	107	5461	59	0.010804	0.551402
3.519944128318876e-06	GO:CC	GO:0097526	spliceosomal tri-snRNP complex	32	5461	25	0.004578	0.78125
3.519944128318876e-06	GO:CC	GO:0046540	U4/U6 x U5 tri-snRNP complex	32	5461	25	0.004578	0.78125
3.868569344942869e-06	GO:CC	GO:0005844	polysome	72	5461	44	0.008057	0.611111
3.8886465345503935e-06	GO:CC	GO:0000779	condensed chromosome, centromeric region	122	5461	65	0.011903	0.532787
6.7184078221206595e-06	GO:CC	GO:0044297	cell body	609	5461	238	0.043582	0.390805
7.356641536197673e-06	GO:CC	GO:0016234	inclusion body	80	5461	47	0.008606	0.5875
8.566640619810316e-06	GO:CC	GO:0031965	nuclear membrane	303	5461	132	0.024171	0.435644
8.711703577189251e-06	GO:CC	GO:0099513	polymeric cytoskeletal fiber	770	5461	291	0.053287	0.377922
9.836478829131044e-06	GO:CC	GO:0016605	PML body	102	5461	56	0.010255	0.54902
1.1096754567215577e-05	GO:CC	GO:0005667	transcription regulator complex	447	5461	182	0.033327	0.407159
1.1783516141011545e-05	GO:CC	GO:0031252	cell leading edge	427	5461	175	0.032045	0.409836
1.2701840517379068e-05	GO:CC	GO:0042470	melanosome	105	5461	57	0.010438	0.542857
1.2701840517379068e-05	GO:CC	GO:0048770	pigment granule	105	5461	57	0.010438	0.542857
1.2778155427153226e-05	GO:CC	GO:0005768	endosome	978	5461	358	0.065556	0.366053
1.318909254849335e-05	GO:CC	GO:0034708	methyltransferase complex	110	5461	59	0.010804	0.536364
1.78509122171573e-05	GO:CC	GO:1905368	peptidase complex	96	5461	53	0.009705	0.552083
1.7975134689646334e-05	GO:CC	GO:0071005	U2-type precatalytic spliceosome	50	5461	33	0.006043	0.66
1.9542931584893242e-05	GO:CC	GO:0019013	viral nucleocapsid	19	5461	17	0.003113	0.894737
1.9542931584893242e-05	GO:CC	GO:0019028	viral capsid	19	5461	17	0.003113	0.894737
2.4611459959562885e-05	GO:CC	GO:0015030	Cajal body	57	5461	36	0.006592	0.631579
3.683419560015957e-05	GO:CC	GO:0005747	mitochondrial respiratory chain complex I	51	5461	33	0.006043	0.647059
3.683419560015957e-05	GO:CC	GO:0045271	respiratory chain complex I	51	5461	33	0.006043	0.647059
3.683419560015957e-05	GO:CC	GO:0030964	NADH dehydrogenase complex	51	5461	33	0.006043	0.647059
3.9314141673581744e-05	GO:CC	GO:1902554	serine/threonine protein kinase complex	88	5461	49	0.008973	0.556818
4.593961423314365e-05	GO:CC	GO:1902911	protein kinase complex	103	5461	55	0.010071	0.533981
6.246838280557237e-05	GO:CC	GO:0005773	vacuole	818	5461	302	0.055301	0.369193
0.00010757383223491155	GO:CC	GO:0000323	lytic vacuole	718	5461	268	0.049075	0.373259
0.00010757383223491155	GO:CC	GO:0005764	lysosome	718	5461	268	0.049075	0.373259
0.00011735635485735913	GO:CC	GO:0000784	nuclear chromosome, telomeric region	123	5461	62	0.011353	0.504065
0.00012955353599400956	GO:CC	GO:0000777	condensed chromosome kinetochore	108	5461	56	0.010255	0.518519
0.00013827607029203026	GO:CC	GO:0005769	early endosome	373	5461	152	0.027834	0.407507
0.00017003149497195726	GO:CC	GO:0017053	transcription repressor complex	79	5461	44	0.008057	0.556962
0.00022055161985265508	GO:CC	GO:0030120	vesicle coat	56	5461	34	0.006226	0.607143
0.00022328147641543307	GO:CC	GO:0035097	histone methyltransferase complex	82	5461	45	0.00824	0.54878
0.00022511883274023927	GO:CC	GO:0005657	replication fork	70	5461	40	0.007325	0.571429
0.000247281694583435	GO:CC	GO:0000152	nuclear ubiquitin ligase complex	45	5461	29	0.00531	0.644444
0.0002617913965350537	GO:CC	GO:0031968	organelle outer membrane	225	5461	99	0.018129	0.44
0.00028739948304486613	GO:CC	GO:0098803	respiratory chain complex	85	5461	46	0.008423	0.541176
0.00029595791299557857	GO:CC	GO:0005746	mitochondrial respirasome	90	5461	48	0.00879	0.533333
0.0002989905827566889	GO:CC	GO:0034451	centriolar satellite	95	5461	50	0.009156	0.526316
0.00032887383052427363	GO:CC	GO:0005876	spindle microtubule	66	5461	38	0.006958	0.575758
0.00038692010245079146	GO:CC	GO:0036477	somatodendritic compartment	873	5461	315	0.057682	0.360825
0.00041820335285656506	GO:CC	GO:0030176	integral component of endoplasmic reticulum membrane	153	5461	72	0.013184	0.470588
0.0004274583096499016	GO:CC	GO:0019867	outer membrane	227	5461	99	0.018129	0.436123
0.00045020691602311525	GO:CC	GO:0030117	membrane coat	96	5461	50	0.009156	0.520833
0.00045020691602311525	GO:CC	GO:0048475	coated membrane	96	5461	50	0.009156	0.520833
0.00048915214263412	GO:CC	GO:0000314	organellar small ribosomal subunit	29	5461	21	0.003845	0.724138
0.00048915214263412	GO:CC	GO:0005763	mitochondrial small ribosomal subunit	29	5461	21	0.003845	0.724138
0.0005990222906504856	GO:CC	GO:0030139	endocytic vesicle	311	5461	128	0.023439	0.411576
0.0006502629482009277	GO:CC	GO:0070469	respirasome	102	5461	52	0.009522	0.509804
0.0011848313882142606	GO:CC	GO:0005905	clathrin-coated pit	71	5461	39	0.007142	0.549296
0.0012440040277752733	GO:CC	GO:0005680	anaphase-promoting complex	24	5461	18	0.003296	0.75
0.001561733848172403	GO:CC	GO:0000792	heterochromatin	79	5461	42	0.007691	0.531646
0.001561733848172403	GO:CC	GO:0042641	actomyosin	79	5461	42	0.007691	0.531646
0.0017743404774058134	GO:CC	GO:0098562	cytoplasmic side of membrane	191	5461	84	0.015382	0.439791
0.0019044347842439454	GO:CC	GO:1904949	ATPase complex	87	5461	45	0.00824	0.517241
0.0019296895545934051	GO:CC	GO:0090734	site of DNA damage	82	5461	43	0.007874	0.52439
0.0019314390201671907	GO:CC	GO:0031227	intrinsic component of endoplasmic reticulum membrane	161	5461	73	0.013368	0.453416
0.0021541804976007	GO:CC	GO:0030426	growth cone	189	5461	83	0.015199	0.439153
0.0028823997672837573	GO:CC	GO:0035145	exon-exon junction complex	19	5461	15	0.002747	0.789474
0.002926190708168786	GO:CC	GO:0030684	preribosome	78	5461	41	0.007508	0.525641
0.003037164505757357	GO:CC	GO:0030427	site of polarized growth	196	5461	85	0.015565	0.433673
0.003334566196146628	GO:CC	GO:0035578	azurophil granule lumen	91	5461	46	0.008423	0.505495
0.003362071794005641	GO:CC	GO:0019908	nuclear cyclin-dependent protein kinase holoenzyme complex	12	5461	11	0.002014	0.916667
0.003414449037419873	GO:CC	GO:0000794	condensed nuclear chromosome	104	5461	51	0.009339	0.490385
0.004885513454514358	GO:CC	GO:0001650	fibrillar center	129	5461	60	0.010987	0.465116
0.006290775140216329	GO:CC	GO:0019898	extrinsic component of membrane	306	5461	122	0.02234	0.398693
0.006915353679205307	GO:CC	GO:0000228	nuclear chromosome	1295	5461	439	0.080388	0.338996
0.0069305492141486895	GO:CC	GO:0098589	membrane region	342	5461	134	0.024538	0.391813
0.007738222967816229	GO:CC	GO:0070603	SWI/SNF superfamily-type complex	83	5461	42	0.007691	0.506024
0.00818872560848975	GO:CC	GO:0044423	virion part	24	5461	17	0.003113	0.708333
0.00818872560848975	GO:CC	GO:0005732	small nucleolar ribonucleoprotein complex	24	5461	17	0.003113	0.708333
0.00818872560848975	GO:CC	GO:0019012	virion	24	5461	17	0.003113	0.708333
0.008440180135469436	GO:CC	GO:0032806	carboxy-terminal domain protein kinase complex	20	5461	15	0.002747	0.75
0.00871075142220359	GO:CC	GO:0030662	coated vesicle membrane	178	5461	77	0.0141	0.432584
0.00967871505149288	GO:CC	GO:0010008	endosome membrane	498	5461	185	0.033877	0.371486
0.00999436120887442	GO:CC	GO:0043025	neuronal cell body	535	5461	197	0.036074	0.368224
0.011355427199823312	GO:CC	GO:0042788	polysomal ribosome	33	5461	21	0.003845	0.636364
0.011469038953880087	GO:CC	GO:0005741	mitochondrial outer membrane	199	5461	84	0.015382	0.422111
0.01342907249433188	GO:CC	GO:0030425	dendrite	627	5461	226	0.041384	0.360447
0.013868558834534913	GO:CC	GO:0090575	RNA polymerase II transcription regulator complex	180	5461	77	0.0141	0.427778
0.015095971077122875	GO:CC	GO:0098800	inner mitochondrial membrane protein complex	144	5461	64	0.011719	0.444444
0.015507592743074504	GO:CC	GO:0042645	mitochondrial nucleoid	45	5461	26	0.004761	0.577778
0.015507592743074504	GO:CC	GO:0009295	nucleoid	45	5461	26	0.004761	0.577778
0.01597077240365274	GO:CC	GO:0008024	cyclin/CDK positive transcription elongation factor complex	8	5461	8	0.001465	1.0
0.016719739150005214	GO:CC	GO:0045202	synapse	1293	5461	435	0.079656	0.336427
0.01686170764475899	GO:CC	GO:0030141	secretory granule	855	5461	298	0.054569	0.348538
0.01690060105714742	GO:CC	GO:0097447	dendritic tree	629	5461	226	0.041384	0.3593
0.01824190811866274	GO:CC	GO:0015629	actin cytoskeleton	509	5461	187	0.034243	0.367387
0.018324695650753318	GO:CC	GO:0000932	P-body	88	5461	43	0.007874	0.488636
0.018702649649607286	GO:CC	GO:0022624	proteasome accessory complex	25	5461	17	0.003113	0.68
0.018770498498865414	GO:CC	GO:0000307	cyclin-dependent protein kinase holoenzyme complex	43	5461	25	0.004578	0.581395
0.01978087990054526	GO:CC	GO:0071565	nBAF complex	15	5461	12	0.002197	0.8
0.02145773538599465	GO:CC	GO:0018995	host cellular component	260	5461	104	0.019044	0.4
0.02145773538599465	GO:CC	GO:0043657	host cell	260	5461	104	0.019044	0.4
0.021615909643136973	GO:CC	GO:0009898	cytoplasmic side of plasma membrane	165	5461	71	0.013001	0.430303
0.021714685743475945	GO:CC	GO:0090545	CHD-type complex	17	5461	13	0.002381	0.764706
0.021714685743475945	GO:CC	GO:0016581	NuRD complex	17	5461	13	0.002381	0.764706
0.021734188340069228	GO:CC	GO:0110165	cellular anatomical entity	18791	5461	5435	0.995239	0.289234
0.022604236214285957	GO:CC	GO:0030018	Z disc	129	5461	58	0.010621	0.449612
0.02282482823172021	GO:CC	GO:0005766	primary lysosome	154	5461	67	0.012269	0.435065
0.02282482823172021	GO:CC	GO:0042582	azurophil granule	154	5461	67	0.012269	0.435065
0.023411701419805028	GO:CC	GO:0043292	contractile fiber	240	5461	97	0.017762	0.404167
0.02527556900232051	GO:CC	GO:0042995	cell projection	2353	5461	757	0.138619	0.321717
0.02592269632137769	GO:CC	GO:0030118	clathrin coat	46	5461	26	0.004761	0.565217
0.026370664386452188	GO:CC	GO:0043005	neuron projection	1396	5461	465	0.085149	0.333095
0.027343965368807264	GO:CC	GO:0043596	nuclear replication fork	39	5461	23	0.004212	0.589744
0.02797459332217584	GO:CC	GO:0031984	organelle subcompartment	384	5461	145	0.026552	0.377604
0.02866944815296109	GO:CC	GO:0098791	Golgi apparatus subcompartment	360	5461	137	0.025087	0.380556
0.028843088419312383	GO:CC	GO:0031674	I band	141	5461	62	0.011353	0.439716
0.029155438997373138	GO:CC	GO:0035861	site of double-strand break	61	5461	32	0.00586	0.52459
0.0308884897115196	GO:CC	GO:0099503	secretory vesicle	1024	5461	349	0.063908	0.34082
0.032011573944414486	GO:CC	GO:0030016	myofibril	230	5461	93	0.01703	0.404348
0.033737797890451504	GO:CC	GO:0045121	membrane raft	328	5461	126	0.023073	0.384146
0.03402879494475177	GO:CC	GO:0097517	contractile actin filament bundle	69	5461	35	0.006409	0.507246
0.03402879494475177	GO:CC	GO:0001725	stress fiber	69	5461	35	0.006409	0.507246
0.0340589207059004	GO:CC	GO:0005832	chaperonin-containing T-complex	10	5461	9	0.001648	0.9
0.0340589207059004	GO:CC	GO:0005687	U4 snRNP	10	5461	9	0.001648	0.9
0.0393352460927256	GO:CC	GO:0098857	membrane microdomain	329	5461	126	0.023073	0.382979
0.040223937985713984	GO:CC	GO:0001726	ruffle	182	5461	76	0.013917	0.417582
0.04447141369948557	GO:CC	GO:0016459	myosin complex	57	5461	30	0.005493	0.526316
0.04559105780801678	GO:CC	GO:0030135	coated vesicle	297	5461	115	0.021058	0.387205
0.04587001452217563	GO:CC	GO:0005938	cell cortex	309	5461	119	0.021791	0.385113
0.04764729337696525	GO:CC	GO:0034709	methylosome	12	5461	10	0.001831	0.833333
0.049843921630164004	GO:CC	GO:0005838	proteasome regulatory particle	22	5461	15	0.002747	0.681818
5.640214466362677e-134	GO:MF	GO:0003824	catalytic activity	5875	5493	2465	0.448753	0.419574
1.0595884090902177e-83	GO:MF	GO:0005515	protein binding	14311	5493	4724	0.860004	0.330096
6.712358175899541e-70	GO:MF	GO:0016740	transferase activity	2370	5493	1086	0.197706	0.458228
2.032900485285874e-56	GO:MF	GO:0003723	RNA binding	1927	5493	887	0.161478	0.460301
6.9441278951716885e-53	GO:MF	GO:0019899	enzyme binding	2282	5493	1004	0.182778	0.439965
4.1926016940234085e-50	GO:MF	GO:0005488	binding	16805	5493	5227	0.951575	0.311038
9.195096833723601e-50	GO:MF	GO:0097159	organic cyclic compound binding	6386	5493	2339	0.425815	0.36627
2.132276700809053e-49	GO:MF	GO:1901363	heterocyclic compound binding	6298	5493	2310	0.420535	0.366783
1.7826679630642909e-47	GO:MF	GO:0042802	identical protein binding	1937	5493	864	0.157291	0.446051
7.177777833975941e-44	GO:MF	GO:1901265	nucleoside phosphate binding	2167	5493	934	0.170035	0.431011
1.1165507033122459e-43	GO:MF	GO:0000166	nucleotide binding	2166	5493	933	0.169853	0.430748
2.0121213560154683e-43	GO:MF	GO:0036094	small molecule binding	2580	5493	1076	0.195886	0.417054
5.152842726725862e-38	GO:MF	GO:0043168	anion binding	2870	5493	1154	0.210086	0.402091
2.6482331556931446e-35	GO:MF	GO:0035639	purine ribonucleoside triphosphate binding	1850	5493	793	0.144366	0.428649
2.922283618969185e-35	GO:MF	GO:0032553	ribonucleotide binding	1933	5493	822	0.149645	0.425246
5.726217326490173e-35	GO:MF	GO:0032555	purine ribonucleotide binding	1916	5493	815	0.148371	0.425365
6.528421365540956e-35	GO:MF	GO:0017076	purine nucleotide binding	1928	5493	819	0.149099	0.424793
2.0493388078952574e-30	GO:MF	GO:0030554	adenyl nucleotide binding	1573	5493	678	0.12343	0.431024
2.7629459998290727e-30	GO:MF	GO:0032559	adenyl ribonucleotide binding	1563	5493	674	0.122702	0.431222
2.8292213673318592e-30	GO:MF	GO:0005524	ATP binding	1504	5493	653	0.118879	0.434176
5.799450128872277e-29	GO:MF	GO:0043167	ion binding	6335	5493	2217	0.403605	0.349961
5.545343660893691e-25	GO:MF	GO:0097367	carbohydrate derivative binding	2277	5493	899	0.163663	0.394818
1.3041116939942259e-23	GO:MF	GO:0003735	structural constituent of ribosome	170	5493	117	0.0213	0.688235
1.895741318664094e-23	GO:MF	GO:0044877	protein-containing complex binding	1268	5493	545	0.099217	0.429811
2.2276870890054987e-23	GO:MF	GO:0140096	catalytic activity, acting on a protein	2260	5493	886	0.161296	0.392035
3.5374457666534467e-23	GO:MF	GO:0016491	oxidoreductase activity	771	5493	363	0.066084	0.470817
4.401249016920761e-22	GO:MF	GO:0016772	transferase activity, transferring phosphorus-containing groups	964	5493	431	0.078463	0.447095
1.163456885657828e-21	GO:MF	GO:0044389	ubiquitin-like protein ligase binding	310	5493	177	0.032223	0.570968
1.6588466770760342e-21	GO:MF	GO:0031625	ubiquitin protein ligase binding	292	5493	169	0.030766	0.578767
4.7853541710366414e-20	GO:MF	GO:0016787	hydrolase activity	2559	5493	969	0.176406	0.378664
6.733339383830823e-18	GO:MF	GO:0045296	cadherin binding	331	5493	178	0.032405	0.537764
8.390108238169947e-18	GO:MF	GO:0016301	kinase activity	808	5493	360	0.065538	0.445545
9.639995612841196e-18	GO:MF	GO:0008134	transcription factor binding	705	5493	322	0.05862	0.456738
1.2964900464094752e-17	GO:MF	GO:0042578	phosphoric ester hydrolase activity	382	5493	198	0.036046	0.518325
2.6312814581671433e-17	GO:MF	GO:0019900	kinase binding	755	5493	339	0.061715	0.449007
4.149215307977172e-17	GO:MF	GO:0003676	nucleic acid binding	4355	5493	1527	0.27799	0.350631
5.0666041594657425e-17	GO:MF	GO:0016788	hydrolase activity, acting on ester bonds	774	5493	345	0.062807	0.445736
2.701227703797334e-16	GO:MF	GO:0003682	chromatin binding	588	5493	274	0.049882	0.465986
6.086900104376959e-16	GO:MF	GO:0016757	transferase activity, transferring glycosyl groups	283	5493	154	0.028036	0.54417
9.931100765276925e-16	GO:MF	GO:0016758	transferase activity, transferring hexosyl groups	206	5493	121	0.022028	0.587379
2.256688587382168e-15	GO:MF	GO:0016791	phosphatase activity	286	5493	154	0.028036	0.538462
4.902917524685812e-15	GO:MF	GO:0042803	protein homodimerization activity	658	5493	296	0.053887	0.449848
5.148070626652875e-15	GO:MF	GO:0008194	UDP-glycosyltransferase activity	146	5493	93	0.016931	0.636986
2.5611502630109652e-14	GO:MF	GO:0019901	protein kinase binding	670	5493	298	0.054251	0.444776
7.055341346702879e-14	GO:MF	GO:0004725	protein tyrosine phosphatase activity	103	5493	71	0.012926	0.68932
1.6215915130824789e-13	GO:MF	GO:0003712	transcription coregulator activity	477	5493	224	0.040779	0.469602
1.89905229084477e-12	GO:MF	GO:0004721	phosphoprotein phosphatase activity	188	5493	107	0.019479	0.569149
7.746896484712419e-12	GO:MF	GO:0019904	protein domain specific binding	714	5493	305	0.055525	0.427171
1.203639998155513e-11	GO:MF	GO:0016773	phosphotransferase activity, alcohol group as acceptor	702	5493	300	0.054615	0.42735
1.882352816549089e-11	GO:MF	GO:0016462	pyrophosphatase activity	863	5493	356	0.06481	0.412514
2.3396176840873396e-11	GO:MF	GO:0016817	hydrolase activity, acting on acid anhydrides	867	5493	357	0.064992	0.411765
2.3396176840873396e-11	GO:MF	GO:0016818	hydrolase activity, acting on acid anhydrides, in phosphorus-containing anhydrides	867	5493	357	0.064992	0.411765
1.1918706982670543e-10	GO:MF	GO:0008022	protein C-terminus binding	192	5493	105	0.019115	0.546875
1.612593579703267e-10	GO:MF	GO:0018024	histone-lysine N-methyltransferase activity	45	5493	37	0.006736	0.822222
1.954512284898744e-10	GO:MF	GO:0050839	cell adhesion molecule binding	539	5493	237	0.043146	0.439703
2.0465522950460225e-10	GO:MF	GO:0042054	histone methyltransferase activity	60	5493	45	0.008192	0.75
7.295648566683966e-10	GO:MF	GO:0003714	transcription corepressor activity	184	5493	100	0.018205	0.543478
9.392272018790225e-10	GO:MF	GO:0046914	transition metal ion binding	1104	5493	431	0.078463	0.390399
2.1503294520229035e-09	GO:MF	GO:0005198	structural molecule activity	696	5493	289	0.052612	0.41523
5.261468141969962e-09	GO:MF	GO:0017111	nucleoside-triphosphatase activity	810	5493	327	0.05953	0.403704
6.843613093291568e-09	GO:MF	GO:0043021	ribonucleoprotein complex binding	134	5493	77	0.014018	0.574627
8.106666665141377e-09	GO:MF	GO:0046983	protein dimerization activity	1047	5493	407	0.074094	0.38873
8.826294120142952e-09	GO:MF	GO:0016746	transferase activity, transferring acyl groups	271	5493	132	0.024031	0.487085
2.2006612176792206e-08	GO:MF	GO:0005200	structural constituent of cytoskeleton	104	5493	63	0.011469	0.605769
4.9249049597311136e-08	GO:MF	GO:0140297	DNA-binding transcription factor binding	378	5493	170	0.030948	0.449735
5.246081132292989e-08	GO:MF	GO:0042826	histone deacetylase binding	117	5493	68	0.012379	0.581197
1.3987552600129395e-07	GO:MF	GO:0000287	magnesium ion binding	220	5493	109	0.019843	0.495455
1.634214518492293e-07	GO:MF	GO:0043169	cation binding	4341	5493	1446	0.263244	0.333103
1.6584576967077367e-07	GO:MF	GO:0070717	poly-purine tract binding	29	5493	25	0.004551	0.862069
1.7081604370598794e-07	GO:MF	GO:0046872	metal ion binding	4254	5493	1419	0.258329	0.333568
2.7942057811517004e-07	GO:MF	GO:0016614	oxidoreductase activity, acting on CH-OH group of donors	137	5493	75	0.013654	0.547445
3.2713681441436803e-07	GO:MF	GO:0016829	lyase activity	202	5493	101	0.018387	0.5
4.5924328113188887e-07	GO:MF	GO:0008143	poly(A) binding	23	5493	21	0.003823	0.913043
6.831061682636899e-07	GO:MF	GO:0016651	oxidoreductase activity, acting on NAD(P)H	108	5493	62	0.011287	0.574074
8.386478464385918e-07	GO:MF	GO:0016616	oxidoreductase activity, acting on the CH-OH group of donors, NAD or NADP as acceptor	125	5493	69	0.012561	0.552
1.1315150695279478e-06	GO:MF	GO:0003725	double-stranded RNA binding	77	5493	48	0.008738	0.623377
1.1532013979593551e-06	GO:MF	GO:0004842	ubiquitin-protein transferase activity	430	5493	184	0.033497	0.427907
1.2799512424686711e-06	GO:MF	GO:0016655	oxidoreductase activity, acting on NAD(P)H, quinone or similar compound as acceptor	62	5493	41	0.007464	0.66129
1.582128880211457e-06	GO:MF	GO:0047498	calcium-dependent phospholipase A2 activity	16	5493	16	0.002913	1.0
1.7592816893429664e-06	GO:MF	GO:0004674	protein serine/threonine kinase activity	446	5493	189	0.034407	0.423767
2.629220219079064e-06	GO:MF	GO:0016747	transferase activity, transferring acyl groups other than amino-acyl groups	237	5493	112	0.02039	0.472574
2.9027691328607826e-06	GO:MF	GO:0004672	protein kinase activity	597	5493	241	0.043874	0.403685
4.161519148565967e-06	GO:MF	GO:0019787	ubiquitin-like protein transferase activity	453	5493	190	0.034589	0.419426
4.679493176317102e-06	GO:MF	GO:0003713	transcription coactivator activity	271	5493	124	0.022574	0.457565
5.2089970998211664e-06	GO:MF	GO:0030145	manganese ion binding	64	5493	41	0.007464	0.640625
5.36389170999479e-06	GO:MF	GO:0061629	RNA polymerase II-specific DNA-binding transcription factor binding	285	5493	129	0.023484	0.452632
1.0517331029017968e-05	GO:MF	GO:0003727	single-stranded RNA binding	90	5493	52	0.009467	0.577778
1.3569769825606328e-05	GO:MF	GO:0004653	polypeptide N-acetylgalactosaminyltransferase activity	20	5493	18	0.003277	0.9
1.3804030228177942e-05	GO:MF	GO:0016887	ATPase activity	425	5493	178	0.032405	0.418824
1.7082181236426972e-05	GO:MF	GO:0001882	nucleoside binding	395	5493	167	0.030402	0.422785
1.9514253482995238e-05	GO:MF	GO:0042393	histone binding	236	5493	109	0.019843	0.461864
2.189810501255139e-05	GO:MF	GO:0004386	helicase activity	163	5493	81	0.014746	0.496933
2.3303538401873944e-05	GO:MF	GO:0009975	cyclase activity	22	5493	19	0.003459	0.863636
2.3303538401873944e-05	GO:MF	GO:0016849	phosphorus-oxygen lyase activity	22	5493	19	0.003459	0.863636
2.330838819093967e-05	GO:MF	GO:0008374	O-acyltransferase activity	49	5493	33	0.006008	0.673469
2.498874845234736e-05	GO:MF	GO:0008137	NADH dehydrogenase (ubiquinone) activity	47	5493	32	0.005826	0.680851
2.498874845234736e-05	GO:MF	GO:0050136	NADH dehydrogenase (quinone) activity	47	5493	32	0.005826	0.680851
2.498874845234736e-05	GO:MF	GO:0003954	NADH dehydrogenase activity	47	5493	32	0.005826	0.680851
2.8071560069795398e-05	GO:MF	GO:0008092	cytoskeletal protein binding	983	5493	366	0.06663	0.37233
2.835883110833722e-05	GO:MF	GO:0032549	ribonucleoside binding	389	5493	164	0.029856	0.421594
4.049814766061697e-05	GO:MF	GO:0001221	transcription cofactor binding	65	5493	40	0.007282	0.615385
4.337324967805844e-05	GO:MF	GO:0031072	heat shock protein binding	122	5493	64	0.011651	0.52459
4.6571361432275566e-05	GO:MF	GO:0008276	protein methyltransferase activity	93	5493	52	0.009467	0.55914
4.663198021441783e-05	GO:MF	GO:0016279	protein-lysine N-methyltransferase activity	63	5493	39	0.0071	0.619048
4.867649817431137e-05	GO:MF	GO:0032550	purine ribonucleoside binding	386	5493	162	0.029492	0.419689
5.04105524174145e-05	GO:MF	GO:0001883	purine nucleoside binding	389	5493	163	0.029674	0.419023
7.117035269187002e-05	GO:MF	GO:0042162	telomeric DNA binding	36	5493	26	0.004733	0.722222
8.539844110757459e-05	GO:MF	GO:0016278	lysine N-methyltransferase activity	64	5493	39	0.0071	0.609375
9.537768385171162e-05	GO:MF	GO:0051219	phosphoprotein binding	85	5493	48	0.008738	0.564706
9.660542985643602e-05	GO:MF	GO:0016411	acylglycerol O-acyltransferase activity	23	5493	19	0.003459	0.826087
9.805917405956836e-05	GO:MF	GO:0005525	GTP binding	381	5493	159	0.028946	0.417323
0.00012253754369431148	GO:MF	GO:0004364	glutathione transferase activity	25	5493	20	0.003641	0.8
0.0001389096098435648	GO:MF	GO:0003697	single-stranded DNA binding	115	5493	60	0.010923	0.521739
0.00017555343124237642	GO:MF	GO:0015020	glucuronosyltransferase activity	33	5493	24	0.004369	0.727273
0.00025117270823229033	GO:MF	GO:0032561	guanyl ribonucleotide binding	403	5493	165	0.030038	0.409429
0.00025117270823229033	GO:MF	GO:0019001	guanyl nucleotide binding	403	5493	165	0.030038	0.409429
0.00027679737327733446	GO:MF	GO:0017069	snRNA binding	46	5493	30	0.005461	0.652174
0.00030638561763661785	GO:MF	GO:0019205	nucleobase-containing compound kinase activity	44	5493	29	0.005279	0.659091
0.0003540874085063952	GO:MF	GO:0008170	N-methyltransferase activity	100	5493	53	0.009649	0.53
0.0003711526889826681	GO:MF	GO:0045309	protein phosphorylated amino acid binding	53	5493	33	0.006008	0.622642
0.00046880943294618264	GO:MF	GO:0045182	translation regulator activity	149	5493	72	0.013108	0.483221
0.00048216927759991925	GO:MF	GO:0016810	hydrolase activity, acting on carbon-nitrogen (but not peptide) bonds	131	5493	65	0.011833	0.496183
0.0005050823878927472	GO:MF	GO:0016765	transferase activity, transferring alkyl or aryl (other than methyl) groups	58	5493	35	0.006372	0.603448
0.0005489819587805438	GO:MF	GO:0008138	protein tyrosine/serine/threonine phosphatase activity	47	5493	30	0.005461	0.638298
0.0005794281039044028	GO:MF	GO:0055106	ubiquitin-protein transferase regulator activity	19	5493	16	0.002913	0.842105
0.0006184055750492419	GO:MF	GO:0016903	oxidoreductase activity, acting on the aldehyde or oxo group of donors	45	5493	29	0.005279	0.644444
0.0007105902903752133	GO:MF	GO:0004312	fatty acid synthase activity	11	5493	11	0.002003	1.0
0.0007591412382409874	GO:MF	GO:0004602	glutathione peroxidase activity	21	5493	17	0.003095	0.809524
0.0008072927502194538	GO:MF	GO:0019902	phosphatase binding	196	5493	89	0.016202	0.454082
0.0008763471218431923	GO:MF	GO:0019903	protein phosphatase binding	151	5493	72	0.013108	0.476821
0.0009810929058869154	GO:MF	GO:0140030	modification-dependent protein binding	154	5493	73	0.01329	0.474026
0.001005493475023927	GO:MF	GO:0004407	histone deacetylase activity	25	5493	19	0.003459	0.76
0.0010504392116628997	GO:MF	GO:0008376	acetylgalactosaminyltransferase activity	48	5493	30	0.005461	0.625
0.0010643651642577617	GO:MF	GO:0102567	phospholipase A2 activity (consuming 1,2-dipalmitoylphosphatidylcholine)	27	5493	20	0.003641	0.740741
0.0010643651642577617	GO:MF	GO:0102568	phospholipase A2 activity consuming 1,2-dioleoylphosphatidylethanolamine)	27	5493	20	0.003641	0.740741
0.0010730297089706414	GO:MF	GO:0140142	nucleocytoplasmic carrier activity	31	5493	22	0.004005	0.709677
0.0010846863434692002	GO:MF	GO:0004693	cyclin-dependent protein serine/threonine kinase activity	29	5493	21	0.003823	0.724138
0.0010846863434692002	GO:MF	GO:0097472	cyclin-dependent protein kinase activity	29	5493	21	0.003823	0.724138
0.0011490998565998267	GO:MF	GO:0003841	1-acylglycerol-3-phosphate O-acyltransferase activity	16	5493	14	0.002549	0.875
0.0012260913476495015	GO:MF	GO:0051287	NAD binding	55	5493	33	0.006008	0.6
0.0019512466241458466	GO:MF	GO:0008094	DNA-dependent ATPase activity	112	5493	56	0.010195	0.5
0.002096833289519505	GO:MF	GO:0061608	nuclear import signal receptor activity	20	5493	16	0.002913	0.8
0.002362881030374654	GO:MF	GO:0030234	enzyme regulator activity	1056	5493	377	0.068633	0.357008
0.0024095011268750605	GO:MF	GO:0004017	adenylate kinase activity	10	5493	10	0.00182	1.0
0.0026061814351879967	GO:MF	GO:0001222	transcription corepressor binding	30	5493	21	0.003823	0.7
0.002611470167597643	GO:MF	GO:0001224	RNA polymerase II transcription cofactor binding	24	5493	18	0.003277	0.75
0.002687089079448587	GO:MF	GO:0008187	poly-pyrimidine tract binding	28	5493	20	0.003641	0.714286
0.002695894506991457	GO:MF	GO:0033558	protein deacetylase activity	26	5493	19	0.003459	0.730769
0.002794785371217241	GO:MF	GO:0061630	ubiquitin protein ligase activity	293	5493	122	0.02221	0.416382
0.003038199574031704	GO:MF	GO:0008135	translation factor activity, RNA binding	98	5493	50	0.009102	0.510204
0.0030681010258359173	GO:MF	GO:0032182	ubiquitin-like protein binding	93	5493	48	0.008738	0.516129
0.0034744490159853802	GO:MF	GO:0043130	ubiquitin binding	76	5493	41	0.007464	0.539474
0.003646326182689403	GO:MF	GO:0003743	translation initiation factor activity	57	5493	33	0.006008	0.578947
0.0037849725709928404	GO:MF	GO:0035257	nuclear hormone receptor binding	148	5493	69	0.012561	0.466216
0.0041769472012154855	GO:MF	GO:0090079	translation regulator activity, nucleic acid binding	122	5493	59	0.010741	0.483607
0.004343286910601064	GO:MF	GO:0016620	oxidoreductase activity, acting on the aldehyde or oxo group of donors, NAD or NADP as acceptor	37	5493	24	0.004369	0.648649
0.00449660425537595	GO:MF	GO:0070491	repressing transcription factor binding	84	5493	44	0.00801	0.52381
0.004574680674927022	GO:MF	GO:0052689	carboxylic ester hydrolase activity	146	5493	68	0.012379	0.465753
0.004726190288904806	GO:MF	GO:0003951	NAD+ kinase activity	17	5493	14	0.002549	0.823529
0.0048449489649823796	GO:MF	GO:0004623	phospholipase A2 activity	35	5493	23	0.004187	0.657143
0.005071845397628117	GO:MF	GO:0097110	scaffold protein binding	60	5493	34	0.00619	0.566667
0.0054228725675271065	GO:MF	GO:0008757	S-adenosylmethionine-dependent methyltransferase activity	160	5493	73	0.01329	0.45625
0.005726916341269399	GO:MF	GO:0042171	lysophosphatidic acid acyltransferase activity	19	5493	15	0.002731	0.789474
0.005726916341269399	GO:MF	GO:0004550	nucleoside diphosphate kinase activity	19	5493	15	0.002731	0.789474
0.006367295474775562	GO:MF	GO:0061659	ubiquitin-like protein ligase activity	303	5493	124	0.022574	0.409241
0.0063774478536107685	GO:MF	GO:0071617	lysophospholipid acyltransferase activity	21	5493	16	0.002913	0.761905
0.006423735253994761	GO:MF	GO:0051879	Hsp90 protein binding	42	5493	26	0.004733	0.619048
0.006481268055227313	GO:MF	GO:0031490	chromatin DNA binding	95	5493	48	0.008738	0.505263
0.00657077669598405	GO:MF	GO:0016628	oxidoreductase activity, acting on the CH-CH group of donors, NAD or NADP as acceptor	27	5493	19	0.003459	0.703704
0.006697824485708622	GO:MF	GO:0140103	catalytic activity, acting on a glycoprotein	23	5493	17	0.003095	0.73913
0.00816919300729175	GO:MF	GO:0097027	ubiquitin-protein transferase activator activity	9	5493	9	0.001638	1.0
0.008440205039765144	GO:MF	GO:0008270	zinc ion binding	828	5493	299	0.054433	0.361111
0.00895402442268743	GO:MF	GO:0003684	damaged DNA binding	66	5493	36	0.006554	0.545455
0.010228733492272364	GO:MF	GO:0003730	mRNA 3'-UTR binding	117	5493	56	0.010195	0.478632
0.010813760860268064	GO:MF	GO:0016627	oxidoreductase activity, acting on the CH-CH group of donors	64	5493	35	0.006372	0.546875
0.010921445581599085	GO:MF	GO:0016229	steroid dehydrogenase activity	34	5493	22	0.004005	0.647059
0.011081268522613891	GO:MF	GO:0140097	catalytic activity, acting on DNA	204	5493	88	0.01602	0.431373
0.01365763695071907	GO:MF	GO:0015036	disulfide oxidoreductase activity	41	5493	25	0.004551	0.609756
0.01365763695071907	GO:MF	GO:0016776	phosphotransferase activity, phosphate group as acceptor	41	5493	25	0.004551	0.609756
0.01416216102543028	GO:MF	GO:0016209	antioxidant activity	87	5493	44	0.00801	0.505747
0.014254101783155204	GO:MF	GO:0005080	protein kinase C binding	55	5493	31	0.005644	0.563636
0.01544697186676895	GO:MF	GO:0001226	RNA polymerase II transcription corepressor binding	18	5493	14	0.002549	0.777778
0.01544697186676895	GO:MF	GO:0070122	isopeptidase activity	18	5493	14	0.002549	0.777778
0.01544697186676895	GO:MF	GO:0042800	histone methyltransferase activity (H3-K4 specific)	18	5493	14	0.002549	0.777778
0.015842892049041858	GO:MF	GO:0008139	nuclear localization sequence binding	26	5493	18	0.003277	0.692308
0.015842892049041858	GO:MF	GO:0016769	transferase activity, transferring nitrogenous groups	26	5493	18	0.003277	0.692308
0.015842892049041858	GO:MF	GO:0048027	mRNA 5'-UTR binding	26	5493	18	0.003277	0.692308
0.016617165496519072	GO:MF	GO:0004707	MAP kinase activity	20	5493	15	0.002731	0.75
0.019014745667172005	GO:MF	GO:0070279	vitamin B6 binding	58	5493	32	0.005826	0.551724
0.019398609491873515	GO:MF	GO:0004143	diacylglycerol kinase activity	11	5493	10	0.00182	0.909091
0.019398609491873515	GO:MF	GO:0004016	adenylate cyclase activity	11	5493	10	0.00182	0.909091
0.020496829954463263	GO:MF	GO:0008375	acetylglucosaminyltransferase activity	51	5493	29	0.005279	0.568627
0.02058560098132507	GO:MF	GO:0005506	iron ion binding	157	5493	70	0.012743	0.44586
0.021374761748915318	GO:MF	GO:0003678	DNA helicase activity	78	5493	40	0.007282	0.512821
0.021374761748915318	GO:MF	GO:0046332	SMAD binding	78	5493	40	0.007282	0.512821
0.021464987632318647	GO:MF	GO:0016811	hydrolase activity, acting on carbon-nitrogen (but not peptide) bonds, in linear amides	73	5493	38	0.006918	0.520548
0.02215089411709081	GO:MF	GO:0051082	unfolded protein binding	109	5493	52	0.009467	0.477064
0.024295727681196103	GO:MF	GO:0019213	deacetylase activity	42	5493	25	0.004551	0.595238
0.024295727681196103	GO:MF	GO:0001784	phosphotyrosine residue binding	42	5493	25	0.004551	0.595238
0.026419467401384768	GO:MF	GO:0016853	isomerase activity	169	5493	74	0.013472	0.43787
0.029539976393245883	GO:MF	GO:0042301	phosphate ion binding	13	5493	11	0.002003	0.846154
0.03481638118245226	GO:MF	GO:0016741	transferase activity, transferring one-carbon groups	232	5493	96	0.017477	0.413793
0.036123525042073626	GO:MF	GO:0030170	pyridoxal phosphate binding	57	5493	31	0.005644	0.54386
0.036123525042073626	GO:MF	GO:0016684	oxidoreductase activity, acting on peroxide as acceptor	57	5493	31	0.005644	0.54386
0.036851693132768634	GO:MF	GO:0098847	sequence-specific single stranded DNA binding	15	5493	12	0.002185	0.8
0.037618322362937766	GO:MF	GO:0008266	poly(U) RNA binding	25	5493	17	0.003095	0.68
0.04036188476101929	GO:MF	GO:0050145	nucleoside monophosphate kinase activity	23	5493	16	0.002913	0.695652
0.040766223974027856	GO:MF	GO:0051427	hormone receptor binding	182	5493	78	0.0142	0.428571
0.042216459603789926	GO:MF	GO:1990381	ubiquitin-specific protease binding	21	5493	15	0.002731	0.714286
0.04677781977547362	GO:MF	GO:0016298	lipase activity	133	5493	60	0.010923	0.451128
0.04691177693683079	GO:MF	GO:0002039	p53 binding	65	5493	34	0.00619	0.523077
3.5648654205359235e-112	KEGG	KEGG:01100	Metabolic pathways	1485	3103	968	0.311956	0.651852
2.688519085416449e-26	KEGG	KEGG:00230	Purine metabolism	128	3103	110	0.03545	0.859375
2.920006478749685e-26	KEGG	KEGG:00564	Glycerophospholipid metabolism	98	3103	90	0.029004	0.918367
1.1494994837288185e-17	KEGG	KEGG:00983	Drug metabolism - other enzymes	78	3103	69	0.022237	0.884615
6.207623313333071e-16	KEGG	KEGG:00310	Lysine degradation	61	3103	56	0.018047	0.918033
6.207623313333071e-16	KEGG	KEGG:00561	Glycerolipid metabolism	61	3103	56	0.018047	0.918033
2.519667787523119e-13	KEGG	KEGG:00590	Arachidonic acid metabolism	63	3103	55	0.017725	0.873016
2.722655015637441e-13	KEGG	KEGG:00140	Steroid hormone biosynthesis	60	3103	53	0.01708	0.883333
3.283624124502729e-11	KEGG	KEGG:00240	Pyrimidine metabolism	57	3103	49	0.015791	0.859649
4.400039408818389e-11	KEGG	KEGG:05204	Chemical carcinogenesis	80	3103	63	0.020303	0.7875
4.716593423671676e-11	KEGG	KEGG:03040	Spliceosome	150	3103	102	0.032871	0.68
7.322324472656131e-11	KEGG	KEGG:00480	Glutathione metabolism	56	3103	48	0.015469	0.857143
1.5856055639483303e-10	KEGG	KEGG:00591	Linoleic acid metabolism	29	3103	29	0.009346	1.0
1.8969450495357242e-10	KEGG	KEGG:00982	Drug metabolism - cytochrome P450	68	3103	55	0.017725	0.808824
2.178639648584973e-10	KEGG	KEGG:00565	Ether lipid metabolism	49	3103	43	0.013858	0.877551
4.954195868885043e-10	KEGG	KEGG:00270	Cysteine and methionine metabolism	48	3103	42	0.013535	0.875
1.2228328406732827e-09	KEGG	KEGG:00071	Fatty acid degradation	44	3103	39	0.012568	0.886364
1.4213161688249131e-09	KEGG	KEGG:05012	Parkinson disease	249	3103	149	0.048018	0.598394
2.0171472565769397e-09	KEGG	KEGG:00350	Tyrosine metabolism	34	3103	32	0.010313	0.941176
2.289831816962297e-09	KEGG	KEGG:04110	Cell cycle	124	3103	85	0.027393	0.685484
4.800160439339585e-09	KEGG	KEGG:00280	Valine, leucine and isoleucine degradation	48	3103	41	0.013213	0.854167
6.155820883216717e-09	KEGG	KEGG:00980	Metabolism of xenobiotics by cytochrome P450	73	3103	56	0.018047	0.767123
9.398770063599004e-09	KEGG	KEGG:03010	Ribosome	153	3103	99	0.031905	0.647059
6.400806132015549e-08	KEGG	KEGG:00860	Porphyrin and chlorophyll metabolism	42	3103	36	0.011602	0.857143
2.295282430863473e-07	KEGG	KEGG:05230	Central carbon metabolism in cancer	70	3103	52	0.016758	0.742857
2.8413112754068903e-07	KEGG	KEGG:00592	alpha-Linolenic acid metabolism	25	3103	24	0.007734	0.96
2.8576527329959376e-07	KEGG	KEGG:00520	Amino sugar and nucleotide sugar metabolism	48	3103	39	0.012568	0.8125
5.362954626031943e-07	KEGG	KEGG:01212	Fatty acid metabolism	57	3103	44	0.01418	0.77193
5.425471015483547e-07	KEGG	KEGG:04120	Ubiquitin mediated proteolysis	139	3103	88	0.02836	0.633094
1.6281354272530418e-06	KEGG	KEGG:00010	Glycolysis / Gluconeogenesis	67	3103	49	0.015791	0.731343
1.9099026078782503e-06	KEGG	KEGG:00760	Nicotinate and nicotinamide metabolism	35	3103	30	0.009668	0.857143
2.273882126257568e-06	KEGG	KEGG:05215	Prostate cancer	97	3103	65	0.020947	0.670103
2.4790628523446844e-06	KEGG	KEGG:00510	N-Glycan biosynthesis	50	3103	39	0.012568	0.78
2.7119541819980112e-06	KEGG	KEGG:05166	Human T-cell leukemia virus 1 infection	216	3103	124	0.039961	0.574074
3.362793983521456e-06	KEGG	KEGG:05014	Amyotrophic lateral sclerosis	363	3103	192	0.061876	0.528926
5.018686980115159e-06	KEGG	KEGG:00600	Sphingolipid metabolism	49	3103	38	0.012246	0.77551
5.283484905932893e-06	KEGG	KEGG:00513	Various types of N-glycan biosynthesis	39	3103	32	0.010313	0.820513
6.075730604442062e-06	KEGG	KEGG:05220	Chronic myeloid leukemia	76	3103	53	0.01708	0.697368
9.985132098782124e-06	KEGG	KEGG:04071	Sphingolipid signaling pathway	119	3103	75	0.02417	0.630252
1.3019985172911322e-05	KEGG	KEGG:05231	Choline metabolism in cancer	98	3103	64	0.020625	0.653061
1.3117046506882599e-05	KEGG	KEGG:00062	Fatty acid elongation	27	3103	24	0.007734	0.888889
1.3117046506882599e-05	KEGG	KEGG:00053	Ascorbate and aldarate metabolism	27	3103	24	0.007734	0.888889
2.2163625467148114e-05	KEGG	KEGG:04914	Progesterone-mediated oocyte maturation	97	3103	63	0.020303	0.649485
3.32517049818907e-05	KEGG	KEGG:00640	Propanoate metabolism	34	3103	28	0.009024	0.823529
3.752483700883211e-05	KEGG	KEGG:01522	Endocrine resistance	96	3103	62	0.019981	0.645833
3.932983691108271e-05	KEGG	KEGG:05016	Huntington disease	306	3103	162	0.052208	0.529412
9.849524622039048e-05	KEGG	KEGG:00514	Other types of O-glycan biosynthesis	47	3103	35	0.011279	0.744681
9.96037843772318e-05	KEGG	KEGG:04910	Insulin signaling pathway	136	3103	81	0.026104	0.595588
0.00017481811274091898	KEGG	KEGG:04218	Cellular senescence	156	3103	90	0.029004	0.576923
0.00019934707743349687	KEGG	KEGG:05010	Alzheimer disease	368	3103	187	0.060264	0.508152
0.000251195819629418	KEGG	KEGG:04068	FoxO signaling pathway	130	3103	77	0.024815	0.592308
0.00028228578843115783	KEGG	KEGG:04540	Gap junction	88	3103	56	0.018047	0.636364
0.00028235876367805896	KEGG	KEGG:00790	Folate biosynthesis	26	3103	22	0.00709	0.846154
0.00029205854068344733	KEGG	KEGG:04141	Protein processing in endoplasmic reticulum	170	3103	96	0.030938	0.564706
0.0003169079491011683	KEGG	KEGG:00052	Galactose metabolism	31	3103	25	0.008057	0.806452
0.0004123451295471441	KEGG	KEGG:05200	Pathways in cancer	529	3103	256	0.082501	0.483932
0.0005664926414066451	KEGG	KEGG:04913	Ovarian steroidogenesis	51	3103	36	0.011602	0.705882
0.0006591381444763446	KEGG	KEGG:01524	Platinum drug resistance	72	3103	47	0.015147	0.652778
0.0006599490629806518	KEGG	KEGG:04072	Phospholipase D signaling pathway	147	3103	84	0.027071	0.571429
0.000704538988358436	KEGG	KEGG:05212	Pancreatic cancer	76	3103	49	0.015791	0.644737
0.0007566151066507684	KEGG	KEGG:05020	Prion disease	273	3103	142	0.045762	0.520147
0.0011270308901702008	KEGG	KEGG:05219	Bladder cancer	41	3103	30	0.009668	0.731707
0.0012453504547765852	KEGG	KEGG:03015	mRNA surveillance pathway	97	3103	59	0.019014	0.608247
0.0017773248213505677	KEGG	KEGG:04931	Insulin resistance	108	3103	64	0.020625	0.592593
0.002165089202707975	KEGG	KEGG:00061	Fatty acid biosynthesis	18	3103	16	0.005156	0.888889
0.0023965389309753807	KEGG	KEGG:01200	Carbon metabolism	117	3103	68	0.021914	0.581197
0.0031092807957639602	KEGG	KEGG:00830	Retinol metabolism	67	3103	43	0.013858	0.641791
0.003611472626165646	KEGG	KEGG:04915	Estrogen signaling pathway	137	3103	77	0.024815	0.562044
0.003897619517936185	KEGG	KEGG:05203	Viral carcinogenesis	202	3103	107	0.034483	0.529703
0.003960448401299658	KEGG	KEGG:00532	Glycosaminoglycan biosynthesis - chondroitin sulfate / dermatan sulfate	20	3103	17	0.005479	0.85
0.004659173183769353	KEGG	KEGG:00512	Mucin type O-glycan biosynthesis	32	3103	24	0.007734	0.75
0.005085706174492111	KEGG	KEGG:05418	Fluid shear stress and atherosclerosis	138	3103	77	0.024815	0.557971
0.005143934450867027	KEGG	KEGG:04975	Fat digestion and absorption	43	3103	30	0.009668	0.697674
0.005252961389171621	KEGG	KEGG:05225	Hepatocellular carcinoma	166	3103	90	0.029004	0.542169
0.006078151557385413	KEGG	KEGG:04066	HIF-1 signaling pathway	109	3103	63	0.020303	0.577982
0.007425658727834328	KEGG	KEGG:04714	Thermogenesis	231	3103	119	0.03835	0.515152
0.010774008687605148	KEGG	KEGG:04140	Autophagy - animal	136	3103	75	0.02417	0.551471
0.010911409661570552	KEGG	KEGG:04152	AMPK signaling pathway	119	3103	67	0.021592	0.563025
0.011353612973601691	KEGG	KEGG:00360	Phenylalanine metabolism	16	3103	14	0.004512	0.875
0.012382279053222991	KEGG	KEGG:04211	Longevity regulating pathway	88	3103	52	0.016758	0.590909
0.012794735757237479	KEGG	KEGG:03013	RNA transport	180	3103	95	0.030616	0.527778
0.013505807191005765	KEGG	KEGG:04114	Oocyte meiosis	126	3103	70	0.022559	0.555556
0.014045909787075813	KEGG	KEGG:05169	Epstein-Barr virus infection	198	3103	103	0.033194	0.520202
0.014115102056372468	KEGG	KEGG:04611	Platelet activation	124	3103	69	0.022237	0.556452
0.014290687634203825	KEGG	KEGG:04920	Adipocytokine signaling pathway	68	3103	42	0.013535	0.617647
0.017545163553221974	KEGG	KEGG:00410	beta-Alanine metabolism	30	3103	22	0.00709	0.733333
0.02066107072078399	KEGG	KEGG:05161	Hepatitis B	162	3103	86	0.027715	0.530864
0.02192748086366544	KEGG	KEGG:05214	Glioma	75	3103	45	0.014502	0.6
0.022501340381315103	KEGG	KEGG:04722	Neurotrophin signaling pathway	119	3103	66	0.02127	0.554622
0.023068657832494358	KEGG	KEGG:05221	Acute myeloid leukemia	67	3103	41	0.013213	0.61194
0.02311610709936437	KEGG	KEGG:00040	Pentose and glucuronate interconversions	34	3103	24	0.007734	0.705882
0.023139148837189642	KEGG	KEGG:04370	VEGF signaling pathway	59	3103	37	0.011924	0.627119
0.023249487710394784	KEGG	KEGG:04213	Longevity regulating pathway - multiple species	61	3103	38	0.012246	0.622951
0.02646673633335617	KEGG	KEGG:05205	Proteoglycans in cancer	205	3103	105	0.033838	0.512195
0.026625878204279026	KEGG	KEGG:05222	Small cell lung cancer	92	3103	53	0.01708	0.576087
0.028327951327416133	KEGG	KEGG:04932	Non-alcoholic fatty liver disease	150	3103	80	0.025782	0.533333
0.02850758216223513	KEGG	KEGG:01040	Biosynthesis of unsaturated fatty acids	27	3103	20	0.006445	0.740741
0.029991050816951262	KEGG	KEGG:00260	Glycine, serine and threonine metabolism	40	3103	27	0.008701	0.675
0.030308051676595768	KEGG	KEGG:04217	Necroptosis	159	3103	84	0.027071	0.528302
0.03639816813360213	KEGG	KEGG:05211	Renal cell carcinoma	68	3103	41	0.013213	0.602941
0.03868105698929323	KEGG	KEGG:04912	GnRH signaling pathway	93	3103	53	0.01708	0.569892
0.0397707250678385	KEGG	KEGG:04510	Focal adhesion	200	3103	102	0.032871	0.51
0.04533216984444531	KEGG	KEGG:04144	Endocytosis	248	3103	123	0.039639	0.495968
0.04615339123105088	KEGG	KEGG:00534	Glycosaminoglycan biosynthesis - heparan sulfate / heparin	24	3103	18	0.005801	0.75
0.049188500444914386	KEGG	KEGG:01521	EGFR tyrosine kinase inhibitor resistance	79	3103	46	0.014824	0.582278
2.1963781830888806e-59	REAC	REAC:R-HSA-1430728	Metabolism	2073	3921	1097	0.279776	0.529185
8.429931217413353e-32	REAC	REAC:R-HSA-8953854	Metabolism of RNA	661	3921	394	0.100485	0.596067
1.3420825206849606e-25	REAC	REAC:R-HSA-392499	Metabolism of proteins	2012	3921	959	0.24458	0.47664
1.4592445201041709e-22	REAC	REAC:R-HSA-72766	Translation	292	3921	194	0.049477	0.664384
1.08295633400129e-20	REAC	REAC:R-HSA-72163	mRNA Splicing - Major Pathway	177	3921	130	0.033155	0.734463
3.313657927129379e-19	REAC	REAC:R-HSA-71291	Metabolism of amino acids and derivatives	370	3921	226	0.057638	0.610811
4.043473936734393e-19	REAC	REAC:R-HSA-72172	mRNA Splicing	185	3921	132	0.033665	0.713514
8.947010886362966e-19	REAC	REAC:R-HSA-1640170	Cell Cycle	661	3921	360	0.091813	0.544629
1.5867314885012519e-18	REAC	REAC:R-HSA-69278	Cell Cycle, Mitotic	548	3921	308	0.078551	0.562044
3.432181960754138e-18	REAC	REAC:R-HSA-556833	Metabolism of lipids	730	3921	389	0.099209	0.532877
4.825632442112333e-18	REAC	REAC:R-HSA-72203	Processing of Capped Intron-Containing Pre-mRNA	236	3921	157	0.040041	0.665254
8.520421465871001e-18	REAC	REAC:R-HSA-2262752	Cellular responses to stress	581	3921	321	0.081867	0.552496
2.236298485454922e-17	REAC	REAC:R-HSA-927802	Nonsense-Mediated Decay (NMD)	116	3921	91	0.023208	0.784483
2.236298485454922e-17	REAC	REAC:R-HSA-975957	Nonsense Mediated Decay (NMD) enhanced by the Exon Junction Complex (EJC)	116	3921	91	0.023208	0.784483
2.6684980078449996e-16	REAC	REAC:R-HSA-9010553	Regulation of expression of SLITs and ROBOs	171	3921	120	0.030604	0.701754
5.248255331784327e-16	REAC	REAC:R-HSA-8953897	Cellular responses to external stimuli	595	3921	322	0.082122	0.541176
1.6349850986245694e-15	REAC	REAC:R-HSA-168255	Influenza Infection	151	3921	108	0.027544	0.715232
3.5310889673239934e-15	REAC	REAC:R-HSA-68882	Mitotic Anaphase	227	3921	147	0.03749	0.647577
6.3676781615465726e-15	REAC	REAC:R-HSA-2555396	Mitotic Metaphase and Anaphase	228	3921	147	0.03749	0.644737
1.573301247244461e-14	REAC	REAC:R-HSA-156827	L13a-mediated translational silencing of Ceruloplasmin expression	112	3921	85	0.021678	0.758929
2.5961466759814862e-14	REAC	REAC:R-HSA-72689	Formation of a pool of free 40S subunits	102	3921	79	0.020148	0.77451
4.065736890123809e-14	REAC	REAC:R-HSA-72706	GTP hydrolysis and joining of the 60S ribosomal subunit	113	3921	85	0.021678	0.752212
6.033104231168665e-14	REAC	REAC:R-HSA-2408522	Selenoamino acid metabolism	117	3921	87	0.022188	0.74359
1.0818346510910429e-13	REAC	REAC:R-HSA-15869	Metabolism of nucleotides	93	3921	73	0.018618	0.784946
1.1157283815452752e-13	REAC	REAC:R-HSA-376176	Signaling by ROBO receptors	217	3921	139	0.03545	0.640553
1.7370832194466774e-13	REAC	REAC:R-HSA-72613	Eukaryotic Translation Initiation	120	3921	88	0.022443	0.733333
1.7370832194466774e-13	REAC	REAC:R-HSA-72737	Cap-dependent Translation Initiation	120	3921	88	0.022443	0.733333
3.1017051427416234e-13	REAC	REAC:R-HSA-156842	Eukaryotic Translation Elongation	94	3921	73	0.018618	0.776596
3.1017051427416234e-13	REAC	REAC:R-HSA-72764	Eukaryotic Translation Termination	94	3921	73	0.018618	0.776596
4.0553400881236247e-13	REAC	REAC:R-HSA-975956	Nonsense Mediated Decay (NMD) independent of the Exon Junction Complex (EJC)	96	3921	74	0.018873	0.770833
1.070939485758633e-12	REAC	REAC:R-HSA-192823	Viral mRNA Translation	90	3921	70	0.017853	0.777778
1.6862588865834303e-12	REAC	REAC:R-HSA-168273	Influenza Viral RNA Transcription and Replication	132	3921	93	0.023718	0.704545
1.8091034345702478e-12	REAC	REAC:R-HSA-2408557	Selenocysteine synthesis	94	3921	72	0.018363	0.765957
1.9034054936701123e-12	REAC	REAC:R-HSA-69275	G2/M Transition	196	3921	126	0.032135	0.642857
1.9113758861109827e-12	REAC	REAC:R-HSA-453274	Mitotic G2-G2/M phases	198	3921	127	0.03239	0.641414
3.4875928829254684e-12	REAC	REAC:R-HSA-597592	Post-translational protein modification	1410	3921	652	0.166284	0.462411
4.2939151849646236e-12	REAC	REAC:R-HSA-9633012	Response of EIF2AK4 (GCN2) to amino acid deficiency	102	3921	76	0.019383	0.745098
6.273922401240086e-12	REAC	REAC:R-HSA-156902	Peptide chain elongation	90	3921	69	0.017598	0.766667
1.735245776397663e-11	REAC	REAC:R-HSA-69620	Cell Cycle Checkpoints	289	3921	169	0.043101	0.584775
2.1942893312151293e-11	REAC	REAC:R-HSA-1799339	SRP-dependent cotranslational protein targeting to membrane	113	3921	81	0.020658	0.716814
9.622954530072993e-11	REAC	REAC:R-HSA-8868773	rRNA processing in the nucleus and cytosol	193	3921	121	0.030859	0.626943
9.938430422862575e-11	REAC	REAC:R-HSA-2467813	Separation of Sister Chromatids	187	3921	118	0.030094	0.631016
3.7738352029408133e-10	REAC	REAC:R-HSA-68886	M Phase	406	3921	219	0.055853	0.539409
7.067425755194503e-10	REAC	REAC:R-HSA-72312	rRNA processing	203	3921	124	0.031625	0.610837
8.918626150274909e-10	REAC	REAC:R-HSA-6791226	Major pathway of rRNA processing in the nucleolus and cytosol	183	3921	114	0.029074	0.622951
1.1628574569886282e-09	REAC	REAC:R-HSA-983168	Antigen processing: Ubiquitination & Proteasome degradation	308	3921	173	0.044121	0.561688
1.5131570507087898e-09	REAC	REAC:R-HSA-5389840	Mitochondrial translation elongation	87	3921	64	0.016322	0.735632
1.6615735695564871e-09	REAC	REAC:R-HSA-453279	Mitotic G1 phase and G1/S transition	148	3921	96	0.024484	0.648649
3.004290282798449e-09	REAC	REAC:R-HSA-69242	S Phase	161	3921	102	0.026014	0.63354
5.944293217006468e-09	REAC	REAC:R-HSA-5610787	Hedgehog 'off' state	113	3921	77	0.019638	0.681416
7.096175459180862e-09	REAC	REAC:R-HSA-5368286	Mitochondrial translation initiation	87	3921	63	0.016067	0.724138
7.096175459180862e-09	REAC	REAC:R-HSA-5419276	Mitochondrial translation termination	87	3921	63	0.016067	0.724138
7.304702023521277e-09	REAC	REAC:R-HSA-9006925	Intracellular signaling by second messengers	289	3921	162	0.041316	0.560554
8.532198453963101e-09	REAC	REAC:R-HSA-69206	G1/S Transition	131	3921	86	0.021933	0.656489
8.959713553085385e-09	REAC	REAC:R-HSA-3700989	Transcriptional Regulation by TP53	360	3921	194	0.049477	0.538889
1.030922880552738e-08	REAC	REAC:R-HSA-5368287	Mitochondrial translation	93	3921	66	0.016832	0.709677
1.2691628886906798e-08	REAC	REAC:R-HSA-983169	Class I MHC mediated antigen processing & presentation	370	3921	198	0.050497	0.535135
1.4096562455218667e-08	REAC	REAC:R-HSA-174143	APC/C-mediated degradation of cell cycle proteins	86	3921	62	0.015812	0.72093
1.4096562455218667e-08	REAC	REAC:R-HSA-453276	Regulation of mitotic cell cycle	86	3921	62	0.015812	0.72093
1.5079340242817874e-08	REAC	REAC:R-HSA-1483206	Glycerophospholipid biosynthesis	128	3921	84	0.021423	0.65625
1.665296528360718e-08	REAC	REAC:R-HSA-8951664	Neddylation	233	3921	135	0.03443	0.579399
1.873900358329321e-08	REAC	REAC:R-HSA-1483257	Phospholipid metabolism	210	3921	124	0.031625	0.590476
2.1659894289872908e-08	REAC	REAC:R-HSA-5357801	Programmed Cell Death	177	3921	108	0.027544	0.610169
2.18308654240272e-08	REAC	REAC:R-HSA-1643685	Disease	1437	3921	642	0.163734	0.446764
4.503097159842303e-08	REAC	REAC:R-HSA-446203	Asparagine N-linked glycosylation	305	3921	167	0.042591	0.547541
5.059403018367298e-08	REAC	REAC:R-HSA-72695	Formation of the ternary complex, and subsequently, the 43S complex	52	3921	42	0.010712	0.807692
5.1019167836537037e-08	REAC	REAC:R-HSA-6807070	PTEN Regulation	138	3921	88	0.022443	0.637681
8.202345566576272e-08	REAC	REAC:R-HSA-168164	Toll Like Receptor 3 (TLR3) Cascade	92	3921	64	0.016322	0.695652
8.418848988192548e-08	REAC	REAC:R-HSA-8852276	The role of GTSE1 in G2/M progression after G2 checkpoint	79	3921	57	0.014537	0.721519
8.839084129375012e-08	REAC	REAC:R-HSA-69306	DNA Replication	127	3921	82	0.020913	0.645669
9.651986595644307e-08	REAC	REAC:R-HSA-422475	Axon guidance	549	3921	273	0.069625	0.497268
9.723775701261758e-08	REAC	REAC:R-HSA-68877	Mitotic Prometaphase	199	3921	117	0.029839	0.58794
1.0169895101724613e-07	REAC	REAC:R-HSA-109581	Apoptosis	174	3921	105	0.026779	0.603448
1.7853079045957234e-07	REAC	REAC:R-HSA-162906	HIV Infection	226	3921	129	0.0329	0.570796
1.878925847286056e-07	REAC	REAC:R-HSA-176408	Regulation of APC/C activators between G1/S and early anaphase	80	3921	57	0.014537	0.7125
2.1993766716714144e-07	REAC	REAC:R-HSA-5663202	Diseases of signal transduction by growth factor receptors and second messengers	359	3921	189	0.048202	0.526462
2.721490611909505e-07	REAC	REAC:R-HSA-69239	Synthesis of DNA	119	3921	77	0.019638	0.647059
3.391159763777986e-07	REAC	REAC:R-HSA-5663205	Infectious disease	790	3921	372	0.094874	0.470886
3.469599853153437e-07	REAC	REAC:R-HSA-5633007	Regulation of TP53 Activity	160	3921	97	0.024739	0.60625
3.54119889339716e-07	REAC	REAC:R-HSA-72702	Ribosomal scanning and start codon recognition	59	3921	45	0.011477	0.762712
3.54119889339716e-07	REAC	REAC:R-HSA-72649	Translation initiation complex formation	59	3921	45	0.011477	0.762712
3.5833646717504647e-07	REAC	REAC:R-HSA-166166	MyD88-independent TLR4 cascade	96	3921	65	0.016577	0.677083
3.5833646717504647e-07	REAC	REAC:R-HSA-937061	TRIF(TICAM1)-mediated TLR4 signaling	96	3921	65	0.016577	0.677083
6.425726381553365e-07	REAC	REAC:R-HSA-176814	Activation of APC/C and APC/C:Cdc20 mediated degradation of mitotic proteins	76	3921	54	0.013772	0.710526
6.683141436390702e-07	REAC	REAC:R-HSA-1257604	PIP3 activates AKT signaling	249	3921	138	0.035195	0.554217
6.966074961520622e-07	REAC	REAC:R-HSA-5607764	CLEC7A (Dectin-1) signaling	97	3921	65	0.016577	0.670103
9.104768657181069e-07	REAC	REAC:R-HSA-72662	Activation of the mRNA upon binding of the cap-binding complex and eIFs, and subsequent binding to 43S	60	3921	45	0.011477	0.75
1.1519972830913656e-06	REAC	REAC:R-HSA-199991	Membrane Trafficking	626	3921	301	0.076766	0.480831
1.1977687261738218e-06	REAC	REAC:R-HSA-9675108	Nervous system development	574	3921	279	0.071155	0.486063
1.232401985124585e-06	REAC	REAC:R-HSA-8878159	Transcriptional regulation by RUNX3	94	3921	63	0.016067	0.670213
1.2522466974168085e-06	REAC	REAC:R-HSA-176409	APC/C:Cdc20 mediated degradation of mitotic proteins	75	3921	53	0.013517	0.706667
1.3268104435666104e-06	REAC	REAC:R-HSA-202424	Downstream TCR signaling	98	3921	65	0.016577	0.663265
1.8452546211960788e-06	REAC	REAC:R-HSA-5358351	Signaling by Hedgehog	149	3921	90	0.022953	0.604027
2.195063715876435e-06	REAC	REAC:R-HSA-174178	APC/C:Cdh1 mediated degradation of Cdc20 and other APC/C:Cdh1 targeted proteins in late mitosis/early G1	72	3921	51	0.013007	0.708333
2.8320457984858412e-06	REAC	REAC:R-HSA-8978868	Fatty acid metabolism	173	3921	101	0.025759	0.583815
3.8136445451656546e-06	REAC	REAC:R-HSA-156590	Glutathione conjugation	34	3921	29	0.007396	0.852941
4.0137357755508595e-06	REAC	REAC:R-HSA-69052	Switching of origins to a post-replicative state	90	3921	60	0.015302	0.666667
4.678842639264751e-06	REAC	REAC:R-HSA-179419	APC:Cdc20 mediated degradation of cell cycle proteins prior to satisfation of the cell cycle checkpoint	73	3921	51	0.013007	0.69863
5.0425364937348135e-06	REAC	REAC:R-HSA-69481	G2/M Checkpoints	168	3921	98	0.024994	0.583333
7.2123699420391755e-06	REAC	REAC:R-HSA-162909	Host Interactions of HIV factors	125	3921	77	0.019638	0.616
8.23739101421495e-06	REAC	REAC:R-HSA-2995410	Nuclear Envelope (NE) Reassembly	70	3921	49	0.012497	0.7
8.967547967068331e-06	REAC	REAC:R-HSA-174184	Cdc20:Phospho-APC/C mediated degradation of Cyclin A	72	3921	50	0.012752	0.694444
1.1778246976109302e-05	REAC	REAC:R-HSA-450294	MAP kinase activation	63	3921	45	0.011477	0.714286
1.3130063272472078e-05	REAC	REAC:R-HSA-8878166	Transcriptional regulation by RUNX2	118	3921	73	0.018618	0.618644
1.332325820817068e-05	REAC	REAC:R-HSA-8941858	Regulation of RUNX3 expression and activity	54	3921	40	0.010201	0.740741
2.0230366942565855e-05	REAC	REAC:R-HSA-211859	Biological oxidations	217	3921	119	0.030349	0.548387
2.058801194613153e-05	REAC	REAC:R-HSA-5607761	Dectin-1 mediated noncanonical NF-kB signaling	60	3921	43	0.010967	0.716667
2.060183826411028e-05	REAC	REAC:R-HSA-2500257	Resolution of Sister Chromatid Cohesion	123	3921	75	0.019128	0.609756
2.367231715423851e-05	REAC	REAC:R-HSA-69656	Cyclin A:Cdk2-associated events at S phase entry	85	3921	56	0.014282	0.658824
2.5392457836051335e-05	REAC	REAC:R-HSA-390466	Chaperonin-mediated protein folding	95	3921	61	0.015557	0.642105
3.4382615303894204e-05	REAC	REAC:R-HSA-69017	CDK-mediated phosphorylation and removal of Cdc6	72	3921	49	0.012497	0.680556
3.92202351477461e-05	REAC	REAC:R-HSA-2173795	Downregulation of SMAD2/3:SMAD4 transcriptional activity	23	3921	21	0.005356	0.913043
4.0456312656015797e-05	REAC	REAC:R-HSA-5676590	NIK-->noncanonical NF-kB signaling	59	3921	42	0.010712	0.711864
4.921678182250982e-05	REAC	REAC:R-HSA-174084	Autodegradation of Cdh1 by Cdh1:APC/C	63	3921	44	0.011222	0.698413
5.3352529917318705e-05	REAC	REAC:R-HSA-73856	RNA Polymerase II Transcription Termination	65	3921	45	0.011477	0.692308
5.7258264652500916e-05	REAC	REAC:R-HSA-174154	APC/C:Cdc20 mediated degradation of Securin	67	3921	46	0.011732	0.686567
7.090204333042943e-05	REAC	REAC:R-HSA-72187	mRNA 3'-end processing	56	3921	40	0.010201	0.714286
7.221857180053247e-05	REAC	REAC:R-HSA-6781827	Transcription-Coupled Nucleotide Excision Repair (TC-NER)	77	3921	51	0.013007	0.662338
7.324693923141714e-05	REAC	REAC:R-HSA-389958	Cooperation of Prefoldin and TriC/CCT in actin and tubulin folding	33	3921	27	0.006886	0.818182
7.704565965578775e-05	REAC	REAC:R-HSA-69202	Cyclin E associated events during G1/S transition	83	3921	54	0.013772	0.650602
9.571688682667792e-05	REAC	REAC:R-HSA-202403	TCR signaling	120	3921	72	0.018363	0.6
0.0001202820297036569	REAC	REAC:R-HSA-156580	Phase II - Conjugation of compounds	106	3921	65	0.016577	0.613208
0.00013611004156528333	REAC	REAC:R-HSA-2173793	Transcriptional activity of SMAD2/SMAD3:SMAD4 heterotrimer	44	3921	33	0.008416	0.75
0.00013622414084272063	REAC	REAC:R-HSA-72202	Transport of Mature Transcript to Cytoplasm	80	3921	52	0.013262	0.65
0.00014280434314757216	REAC	REAC:R-HSA-75105	Fatty acyl-CoA biosynthesis	37	3921	29	0.007396	0.783784
0.00015406053897410992	REAC	REAC:R-HSA-1482788	Acyl chain remodelling of PC	27	3921	23	0.005866	0.851852
0.0001638323772795798	REAC	REAC:R-HSA-8956319	Nucleobase catabolism	32	3921	26	0.006631	0.8125
0.00017097849071818835	REAC	REAC:R-HSA-9648025	EML4 and NUDC in mitotic spindle formation	115	3921	69	0.017598	0.6
0.00017947299705583735	REAC	REAC:R-HSA-5678895	Defective CFTR causes cystic fibrosis	61	3921	42	0.010712	0.688525
0.0001851311775417038	REAC	REAC:R-HSA-1483166	Synthesis of PA	39	3921	30	0.007651	0.769231
0.00019037891802192389	REAC	REAC:R-HSA-5696398	Nucleotide Excision Repair	109	3921	66	0.016832	0.605505
0.00020386333908541552	REAC	REAC:R-HSA-75876	Synthesis of very long-chain fatty acyl-CoAs	24	3921	21	0.005356	0.875
0.0002114547440896515	REAC	REAC:R-HSA-1169091	Activation of NF-kappaB in B cells	67	3921	45	0.011477	0.671642
0.0002268760543948356	REAC	REAC:R-HSA-68949	Orc1 removal from chromatin	71	3921	47	0.011987	0.661972
0.0002268760543948356	REAC	REAC:R-HSA-170834	Signaling by TGF-beta Receptor Complex	71	3921	47	0.011987	0.661972
0.00024427877626742144	REAC	REAC:R-HSA-69002	DNA Replication Pre-Initiation	85	3921	54	0.013772	0.635294
0.0002449034509424293	REAC	REAC:R-HSA-195253	Degradation of beta-catenin by the destruction complex	83	3921	53	0.013517	0.638554
0.00031715114350489547	REAC	REAC:R-HSA-69618	Mitotic Spindle Checkpoint	108	3921	65	0.016577	0.601852
0.00033916358277884446	REAC	REAC:R-HSA-187577	SCF(Skp2)-mediated degradation of p27/p21	60	3921	41	0.010457	0.683333
0.00033916358277884446	REAC	REAC:R-HSA-5610780	Degradation of GLI1 by the proteasome	60	3921	41	0.010457	0.683333
0.0004024100186495437	REAC	REAC:R-HSA-68867	Assembly of the pre-replicative complex	68	3921	45	0.011477	0.661765
0.00042197962074902223	REAC	REAC:R-HSA-450531	Regulation of mRNA stability by proteins that bind AU-rich elements	86	3921	54	0.013772	0.627907
0.0004936112523454501	REAC	REAC:R-HSA-71387	Metabolism of carbohydrates	284	3921	144	0.036725	0.507042
0.0005599260614477121	REAC	REAC:R-HSA-389957	Prefoldin mediated transfer of substrate to CCT/TriC	28	3921	23	0.005866	0.821429
0.0005634935101402843	REAC	REAC:R-HSA-174113	SCF-beta-TrCP mediated degradation of Emi1	55	3921	38	0.009691	0.690909
0.0006924992621522438	REAC	REAC:R-HSA-6782210	Gap-filling DNA repair synthesis and ligation in TC-NER	63	3921	42	0.010712	0.666667
0.0007001405625158086	REAC	REAC:R-HSA-5687128	MAPK6/MAPK4 signaling	89	3921	55	0.014027	0.617978
0.0007541559188420192	REAC	REAC:R-HSA-159236	Transport of Mature mRNA derived from an Intron-Containing Transcript	71	3921	46	0.011732	0.647887
0.0008150621156368098	REAC	REAC:R-HSA-176187	Activation of ATR in response to replication stress	37	3921	28	0.007141	0.756757
0.0008283673807873066	REAC	REAC:R-HSA-156588	Glucuronidation	25	3921	21	0.005356	0.84
0.0009391696739665988	REAC	REAC:R-HSA-391251	Protein folding	102	3921	61	0.015557	0.598039
0.0009467805921049902	REAC	REAC:R-HSA-5621481	C-type lectin receptors (CLRs)	136	3921	77	0.019638	0.566176
0.000999243603689848	REAC	REAC:R-HSA-69610	p53-Independent DNA Damage Response	52	3921	36	0.009181	0.692308
0.000999243603689848	REAC	REAC:R-HSA-69601	Ubiquitin Mediated Degradation of Phosphorylated Cdc25A	52	3921	36	0.009181	0.692308
0.000999243603689848	REAC	REAC:R-HSA-69613	p53-Independent G1/S DNA damage checkpoint	52	3921	36	0.009181	0.692308
0.000999243603689848	REAC	REAC:R-HSA-180534	Vpu mediated degradation of CD4	52	3921	36	0.009181	0.692308
0.0010875407814256153	REAC	REAC:R-HSA-380320	Recruitment of NuMA to mitotic centrosomes	94	3921	57	0.014537	0.606383
0.0011574211101021453	REAC	REAC:R-HSA-111885	Opioid Signalling	90	3921	55	0.014027	0.611111
0.0012304991559911134	REAC	REAC:R-HSA-5610785	GLI3 is processed to GLI3R by the proteasome	60	3921	40	0.010201	0.666667
0.0012304991559911134	REAC	REAC:R-HSA-5610783	Degradation of GLI2 by the proteasome	60	3921	40	0.010201	0.666667
0.0012315619542115524	REAC	REAC:R-HSA-6811442	Intra-Golgi and retrograde Golgi-to-ER traffic	203	3921	107	0.027289	0.527094
0.001274044223241599	REAC	REAC:R-HSA-166016	Toll Like Receptor 4 (TLR4) Cascade	126	3921	72	0.018363	0.571429
0.0012976270990612208	REAC	REAC:R-HSA-1168372	Downstream signaling events of B Cell Receptor (BCR)	80	3921	50	0.012752	0.625
0.0013350305885929553	REAC	REAC:R-HSA-69615	G1/S DNA Damage Checkpoints	68	3921	44	0.011222	0.647059
0.0015459525419216867	REAC	REAC:R-HSA-9020702	Interleukin-1 signaling	101	3921	60	0.015302	0.594059
0.0015538912988324587	REAC	REAC:R-HSA-2995383	Initiation of Nuclear Envelope (NE) Reformation	16	3921	15	0.003826	0.9375
0.0018351863340534172	REAC	REAC:R-HSA-4839726	Chromatin organization	273	3921	137	0.03494	0.501832
0.0018351863340534172	REAC	REAC:R-HSA-3247509	Chromatin modifying enzymes	273	3921	137	0.03494	0.501832
0.0018992321185494988	REAC	REAC:R-HSA-72165	mRNA Splicing - Minor Pathway	51	3921	35	0.008926	0.686275
0.0020108552247423825	REAC	REAC:R-HSA-9604323	Negative regulation of NOTCH4 signaling	53	3921	36	0.009181	0.679245
0.002070353530607175	REAC	REAC:R-HSA-2565942	Regulation of PLK1 Activity at G2/M Transition	85	3921	52	0.013262	0.611765
0.002070353530607175	REAC	REAC:R-HSA-70326	Glucose metabolism	85	3921	52	0.013262	0.611765
0.0021072687798245485	REAC	REAC:R-HSA-8854050	FBXL7 down-regulates AURKA during mitotic entry and in early mitosis	55	3921	37	0.009436	0.672727
0.0021072687798245485	REAC	REAC:R-HSA-4641257	Degradation of AXIN	55	3921	37	0.009436	0.672727
0.002148026439449581	REAC	REAC:R-HSA-5663220	RHO GTPases Activate Formins	136	3921	76	0.019383	0.558824
0.0021818058092477107	REAC	REAC:R-HSA-9013694	Signaling by NOTCH4	81	3921	50	0.012752	0.617284
0.0022045048646066575	REAC	REAC:R-HSA-5688426	Deubiquitination	297	3921	147	0.03749	0.494949
0.0023621460317765925	REAC	REAC:R-HSA-448424	Interleukin-17 signaling	71	3921	45	0.011477	0.633803
0.0023737573942674297	REAC	REAC:R-HSA-8948751	Regulation of PTEN stability and activity	69	3921	44	0.011222	0.637681
0.0026131053456331962	REAC	REAC:R-HSA-75893	TNF signaling	42	3921	30	0.007651	0.714286
0.002802252538062396	REAC	REAC:R-HSA-389960	Formation of tubulin folding intermediates by CCT/TriC	26	3921	21	0.005356	0.807692
0.00289215596262826	REAC	REAC:R-HSA-9646399	Aggrephagy	44	3921	31	0.007906	0.704545
0.0031295691143356924	REAC	REAC:R-HSA-975138	TRAF6 mediated induction of NFkB and MAP kinases upon TLR7/8 or 9 activation	90	3921	54	0.013772	0.6
0.0034857236352758675	REAC	REAC:R-HSA-5696399	Global Genome Nucleotide Excision Repair (GG-NER)	84	3921	51	0.013007	0.607143
0.0034857236352758675	REAC	REAC:R-HSA-168176	Toll Like Receptor 5 (TLR5) Cascade	84	3921	51	0.013007	0.607143
0.0034857236352758675	REAC	REAC:R-HSA-975871	MyD88 cascade initiated on plasma membrane	84	3921	51	0.013007	0.607143
0.0034857236352758675	REAC	REAC:R-HSA-168142	Toll Like Receptor 10 (TLR10) Cascade	84	3921	51	0.013007	0.607143
0.0035711152110972783	REAC	REAC:R-HSA-1482925	Acyl chain remodelling of PG	18	3921	16	0.004081	0.888889
0.003752149649142925	REAC	REAC:R-HSA-75815	Ubiquitin-dependent degradation of Cyclin D	52	3921	35	0.008926	0.673077
0.003752149649142925	REAC	REAC:R-HSA-6781823	Formation of TC-NER Pre-Incision Complex	52	3921	35	0.008926	0.673077
0.003966118529350277	REAC	REAC:R-HSA-8956320	Nucleobase biosynthesis	15	3921	14	0.003571	0.933333
0.004009097110544136	REAC	REAC:R-HSA-5362768	Hh mutants that don't undergo autocatalytic processing are degraded by ERAD	56	3921	37	0.009436	0.660714
0.004095126415984717	REAC	REAC:R-HSA-351202	Metabolism of polyamines	58	3921	38	0.009691	0.655172
0.004174973922691663	REAC	REAC:R-HSA-73894	DNA Repair	328	3921	159	0.040551	0.484756
0.004191533208083725	REAC	REAC:R-HSA-69580	p53-Dependent G1/S DNA damage checkpoint	66	3921	42	0.010712	0.636364
0.004191533208083725	REAC	REAC:R-HSA-69563	p53-Dependent G1 DNA Damage Response	66	3921	42	0.010712	0.636364
0.004330818022074543	REAC	REAC:R-HSA-9637690	Response of Mtb to phagocytosis	23	3921	19	0.004846	0.826087
0.004732488317680276	REAC	REAC:R-HSA-162587	HIV Life Cycle	147	3921	80	0.020403	0.544218
0.004893671091204626	REAC	REAC:R-HSA-70268	Pyruvate metabolism	30	3921	23	0.005866	0.766667
0.004951535641976606	REAC	REAC:R-HSA-168181	Toll Like Receptor 7/8 (TLR7/8) Cascade	91	3921	54	0.013772	0.593407
0.004951535641976606	REAC	REAC:R-HSA-975155	MyD88 dependent cascade initiated on endosome	91	3921	54	0.013772	0.593407
0.005447290666303025	REAC	REAC:R-HSA-3858494	Beta-catenin independent WNT signaling	143	3921	78	0.019893	0.545455
0.005594302206716866	REAC	REAC:R-HSA-69231	Cyclin D associated events in G1	43	3921	30	0.007651	0.697674
0.005594302206716866	REAC	REAC:R-HSA-69236	G1 Phase	43	3921	30	0.007651	0.697674
0.005858424631284825	REAC	REAC:R-HSA-8878171	Transcriptional regulation by RUNX1	236	3921	119	0.030349	0.504237
0.006192922735165787	REAC	REAC:R-HSA-69273	Cyclin A/B1/B2 associated events during G2/M transition	25	3921	20	0.005101	0.8
0.006386832007086901	REAC	REAC:R-HSA-948021	Transport to the Golgi and subsequent modification	186	3921	97	0.024739	0.521505
0.0066397951561676175	REAC	REAC:R-HSA-1234174	Cellular response to hypoxia	75	3921	46	0.011732	0.613333
0.006736904729454947	REAC	REAC:R-HSA-5653656	Vesicle-mediated transport	720	3921	319	0.081357	0.443056
0.006979708560537175	REAC	REAC:R-HSA-8939902	Regulation of RUNX2 expression and activity	71	3921	44	0.011222	0.619718
0.00707785459597934	REAC	REAC:R-HSA-8953750	Transcriptional Regulation by E2F6	34	3921	25	0.006376	0.735294
0.00713799991881057	REAC	REAC:R-HSA-6811436	COPI-independent Golgi-to-ER retrograde traffic	53	3921	35	0.008926	0.660377
0.007282591588670761	REAC	REAC:R-HSA-168643	Nucleotide-binding domain, leucine rich repeat containing receptor (NLR) signaling pathways	55	3921	36	0.009181	0.654545
0.00734216342810345	REAC	REAC:R-HSA-168188	Toll Like Receptor TLR6:TLR2 Cascade	94	3921	55	0.014027	0.585106
0.00734216342810345	REAC	REAC:R-HSA-166058	MyD88:MAL(TIRAP) cascade initiated on plasma membrane	94	3921	55	0.014027	0.585106
0.0073776594918762315	REAC	REAC:R-HSA-4641258	Degradation of DVL	57	3921	37	0.009436	0.649123
0.0073776594918762315	REAC	REAC:R-HSA-69541	Stabilization of p53	57	3921	37	0.009436	0.649123
0.007426805274966889	REAC	REAC:R-HSA-68827	CDT1 association with the CDC6:ORC:origin complex	59	3921	38	0.009691	0.644068
0.007713277899919756	REAC	REAC:R-HSA-141444	Amplification of signal from unattached kinetochores via a MAD2 inhibitory signal	92	3921	54	0.013772	0.586957
0.007713277899919756	REAC	REAC:R-HSA-141424	Amplification of signal from the kinetochores	92	3921	54	0.013772	0.586957
0.008066089558058598	REAC	REAC:R-HSA-73621	Pyrimidine catabolism	11	3921	11	0.002805	1.0
0.00865940202516033	REAC	REAC:R-HSA-1482922	Acyl chain remodelling of PI	17	3921	15	0.003826	0.882353
0.009445129338825782	REAC	REAC:R-HSA-446652	Interleukin-1 family signaling	138	3921	75	0.019128	0.543478
0.009517038216568149	REAC	REAC:R-HSA-74160	Gene expression (Transcription)	1473	3921	615	0.156848	0.417515
0.009783634857376636	REAC	REAC:R-HSA-1482801	Acyl chain remodelling of PS	22	3921	18	0.004591	0.818182
0.010454442222778972	REAC	REAC:R-HSA-8852135	Protein ubiquitination	78	3921	47	0.011987	0.602564
0.010454442222778972	REAC	REAC:R-HSA-446193	Biosynthesis of the N-glycan precursor (dolichol lipid-linked oligosaccharide, LLO) and transfer to a nascent protein	78	3921	47	0.011987	0.602564
0.010879800298768416	REAC	REAC:R-HSA-8856688	Golgi-to-ER retrograde transport	134	3921	73	0.018618	0.544776
0.011219948163477407	REAC	REAC:R-HSA-168138	Toll Like Receptor 9 (TLR9) Cascade	95	3921	55	0.014027	0.578947
0.012383196248608595	REAC	REAC:R-HSA-73893	DNA Damage Bypass	48	3921	32	0.008161	0.666667
0.012723150081362558	REAC	REAC:R-HSA-211733	Regulation of activated PAK-2p34 by proteasome mediated degradation	50	3921	33	0.008416	0.66
0.0127400752571481	REAC	REAC:R-HSA-4608870	Asymmetric localization of PCP proteins	64	3921	40	0.010201	0.625
0.0127400752571481	REAC	REAC:R-HSA-6782135	Dual incision in TC-NER	64	3921	40	0.010201	0.625
0.01296371810855524	REAC	REAC:R-HSA-349425	Autodegradation of the E3 ubiquitin ligase COP1	52	3921	34	0.008671	0.653846
0.01296371810855524	REAC	REAC:R-HSA-109606	Intrinsic Pathway for Apoptosis	52	3921	34	0.008671	0.653846
0.013375580865917535	REAC	REAC:R-HSA-1280218	Adaptive Immune System	800	3921	349	0.089008	0.43625
0.014811485630022813	REAC	REAC:R-HSA-110320	Translesion Synthesis by POLH	19	3921	16	0.004081	0.842105
0.015038273282700469	REAC	REAC:R-HSA-9006936	Signaling by TGFB family members	100	3921	57	0.014537	0.57
0.017712533739705254	REAC	REAC:R-HSA-6806003	Regulation of TP53 Expression and Degradation	37	3921	26	0.006631	0.702703
0.01894420197509809	REAC	REAC:R-HSA-6804756	Regulation of TP53 Activity through Phosphorylation	92	3921	53	0.013517	0.576087
0.019135825251591708	REAC	REAC:R-HSA-5675221	Negative regulation of MAPK pathway	39	3921	27	0.006886	0.692308
0.019476861048031258	REAC	REAC:R-HSA-8854518	AURKA Activation by TPX2	71	3921	43	0.010967	0.605634
0.020786316843585874	REAC	REAC:R-HSA-5658442	Regulation of RAS by GAPs	67	3921	41	0.010457	0.61194
0.02085170914297499	REAC	REAC:R-HSA-204174	Regulation of pyruvate dehydrogenase (PDH) complex	16	3921	14	0.003571	0.875
0.02139070844952013	REAC	REAC:R-HSA-1614635	Sulfur amino acid metabolism	28	3921	21	0.005356	0.75
0.0219027691449468	REAC	REAC:R-HSA-5651801	PCNA-Dependent Long Patch Base Excision Repair	21	3921	17	0.004336	0.809524
0.0226983985463429	REAC	REAC:R-HSA-162599	Late Phase of HIV Life Cycle	134	3921	72	0.018363	0.537313
0.022805329256399783	REAC	REAC:R-HSA-8943724	Regulation of PTEN gene transcription	59	3921	37	0.009436	0.627119
0.022805329256399783	REAC	REAC:R-HSA-5387390	Hh mutants abrogate ligand secretion	59	3921	37	0.009436	0.627119
0.023112976776308518	REAC	REAC:R-HSA-3371497	HSP90 chaperone cycle for steroid hormone receptors (SHR)	57	3921	36	0.009181	0.631579
0.023312774429885032	REAC	REAC:R-HSA-6799198	Complex I biogenesis	55	3921	35	0.008926	0.636364
0.02331780486287497	REAC	REAC:R-HSA-168898	Toll-like Receptor Cascades	152	3921	80	0.020403	0.526316
0.02332418114631764	REAC	REAC:R-HSA-350562	Regulation of ornithine decarboxylase (ODC)	51	3921	33	0.008416	0.647059
0.02338868750072972	REAC	REAC:R-HSA-180585	Vif-mediated degradation of APOBEC3G	53	3921	34	0.008671	0.641509
0.02338868750072972	REAC	REAC:R-HSA-112043	PLC beta mediated events	53	3921	34	0.008671	0.641509
0.02338868750072972	REAC	REAC:R-HSA-169911	Regulation of Apoptosis	53	3921	34	0.008671	0.641509
0.025100702794902438	REAC	REAC:R-HSA-110314	Recognition of DNA damage by PCNA-containing replication complex	30	3921	22	0.005611	0.733333
0.025100702794902438	REAC	REAC:R-HSA-5357956	TNFR1-induced NFkappaB signaling pathway	30	3921	22	0.005611	0.733333
0.025100702794902438	REAC	REAC:R-HSA-9022692	Regulation of MECP2 expression and activity	30	3921	22	0.005611	0.733333
0.025133667998171492	REAC	REAC:R-HSA-181438	Toll Like Receptor 2 (TLR2) Cascade	97	3921	55	0.014027	0.56701
0.025133667998171492	REAC	REAC:R-HSA-168179	Toll Like Receptor TLR1:TLR2 Cascade	97	3921	55	0.014027	0.56701
0.02549266783949324	REAC	REAC:R-HSA-1483213	Synthesis of PE	13	3921	12	0.00306	0.923077
0.02549266783949324	REAC	REAC:R-HSA-174414	Processive synthesis on the C-strand of the telomere	13	3921	12	0.00306	0.923077
0.02598917544729856	REAC	REAC:R-HSA-380270	Recruitment of mitotic centrosome proteins and complexes	80	3921	47	0.011987	0.5875
0.02598917544729856	REAC	REAC:R-HSA-9663891	Selective autophagy	80	3921	47	0.011987	0.5875
0.02598917544729856	REAC	REAC:R-HSA-380287	Centrosome maturation	80	3921	47	0.011987	0.5875
0.030971881965199205	REAC	REAC:R-HSA-5617833	Cilium Assembly	201	3921	101	0.025759	0.502488
0.03420784573390166	REAC	REAC:R-HSA-6804757	Regulation of TP53 Degradation	36	3921	25	0.006376	0.694444
0.036423835396829835	REAC	REAC:R-HSA-8853884	Transcriptional Regulation by VENTX	38	3921	26	0.006631	0.684211
0.03690186296213507	REAC	REAC:R-HSA-179409	APC-Cdc20 mediated degradation of Nek2A	25	3921	19	0.004846	0.76
0.03690186296213507	REAC	REAC:R-HSA-5696397	Gap-filling DNA repair synthesis and ligation in GG-NER	25	3921	19	0.004846	0.76
0.039595550681796814	REAC	REAC:R-HSA-6814122	Cooperation of PDCL (PhLP1) and TRiC/CCT in G-protein beta folding	42	3921	28	0.007141	0.666667
0.040859482976661074	REAC	REAC:R-HSA-112040	G-protein mediated events	54	3921	34	0.008671	0.62963
0.040859482976661074	REAC	REAC:R-HSA-450408	AUF1 (hnRNP D0) binds and destabilizes mRNA	54	3921	34	0.008671	0.62963
0.04122446715425988	REAC	REAC:R-HSA-2122947	NOTCH1 Intracellular Domain Regulates Transcription	46	3921	30	0.007651	0.652174
0.04394848096803351	REAC	REAC:R-HSA-73857	RNA Polymerase II Transcription	1340	3921	557	0.142056	0.415672
0.04402700899171235	REAC	REAC:R-HSA-499943	Interconversion of nucleotide di- and triphosphates	27	3921	20	0.005101	0.740741
0.044349099595185834	REAC	REAC:R-HSA-5619084	ABC transporter disorders	77	3921	45	0.011477	0.584416
0.04746086214662623	REAC	REAC:R-HSA-2990846	SUMOylation	175	3921	89	0.022698	0.508571
0.048685560186148766	REAC	REAC:R-HSA-2132295	MHC class II antigen presentation	123	3921	66	0.016832	0.536585
