# Supplementary material for: Network neighbors of viral targets and differentially expressed genes in COVID-19 are drug target candidates
Source: Sci Rep. 2021 Sep 23;11:18985. doi: 10.1038/s41598-021-98289-x (PMC8460804; doi:10.1038/s41598-021-98289-x)
Supplement: Supplementary file 8 — Supplementary Information 8. [file 41598_2021_98289_MOESM8_ESM.csv]

P-value	Source	Term id	Term name	Term size	Query size	Intersection size	Precision	Recall
1.0222899742201945e-08	GO:BP	GO:0055085	transmembrane transport	1632	2613	334	0.12782242632988902	0.20465686274509803
1.2908215649621692e-07	GO:BP	GO:0006811	ion transport	1730	2613	345	0.13203214695752008	0.1994219653179191
1.4783829478013122e-06	GO:BP	GO:0034220	ion transmembrane transport	1179	2613	246	0.09414466130884042	0.20865139949109415
1.7422233216269639e-06	GO:BP	GO:0098742	cell-cell adhesion via plasma-membrane adhesion molecules	275	2613	79	0.030233448143895905	0.2872727272727273
1.543028638338903e-05	GO:BP	GO:0006820	anion transport	677	2613	153	0.05855338691159587	0.2259970457902511
0.00012766031104672563	GO:BP	GO:0015711	organic anion transport	532	2613	123	0.04707233065442021	0.231203007518797
0.0001608255099496943	GO:BP	GO:0098656	anion transmembrane transport	317	2613	82	0.03138155376961347	0.2586750788643533
0.0007961129444970872	GO:BP	GO:0006812	cation transport	1197	2613	235	0.08993494068120934	0.19632414369256473
0.0008410735928381539	GO:BP	GO:0007156	homophilic cell adhesion via plasma membrane adhesion molecules	169	2613	50	0.019135093761959432	0.2958579881656805
0.0040282200128123535	GO:BP	GO:0098655	cation transmembrane transport	894	2613	180	0.06888633754305395	0.20134228187919462
0.004238989572814231	GO:BP	GO:0051180	vitamin transport	42	2613	19	0.007271335629544585	0.4523809523809524
0.00973639444990885	GO:BP	GO:0001708	cell fate specification	102	2613	33	0.012629161882893225	0.3235294117647059
0.012112517444918133	GO:BP	GO:0098660	inorganic ion transmembrane transport	862	2613	172	0.06582472254114045	0.19953596287703015
0.012722617236262961	GO:BP	GO:0007601	visual perception	219	2613	57	0.021814006888633754	0.2602739726027397
0.016643594478671593	GO:BP	GO:0098739	import across plasma membrane	156	2613	44	0.016838882510524303	0.28205128205128205
0.017058274857021903	GO:BP	GO:0006865	amino acid transport	161	2613	45	0.01722158438576349	0.2795031055900621
0.019860843602630282	GO:BP	GO:0050953	sensory perception of light stimulus	222	2613	57	0.021814006888633754	0.25675675675675674
0.03565641966347011	GO:BP	GO:0003333	amino acid transmembrane transport	94	2613	30	0.011481056257175661	0.3191489361702128
0.04296609099536813	GO:BP	GO:0015748	organophosphate ester transport	137	2613	39	0.014925373134328358	0.2846715328467153
0.046133078006138764	GO:BP	GO:1905039	carboxylic acid transmembrane transport	152	2613	42	0.016073478760045924	0.27631578947368424
8.17519380230494e-22	GO:CC	GO:0005887	integral component of plasma membrane	1615	2772	383	0.13816738816738816	0.2371517027863777
2.25765096532339e-20	GO:CC	GO:0031226	intrinsic component of plasma membrane	1692	2772	392	0.1414141414141414	0.23167848699763594
1.2288681373379178e-15	GO:CC	GO:0031224	intrinsic component of membrane	5852	2772	1053	0.37987012987012986	0.1799384825700615
4.304984096601729e-15	GO:CC	GO:0016021	integral component of membrane	5699	2772	1026	0.37012987012987014	0.18003158448850676
0.00016070149740875488	GO:CC	GO:0034364	high-density lipoprotein particle	29	2772	16	0.005772005772005772	0.5517241379310345
0.00030108425395437133	GO:CC	GO:1902495	transmembrane transporter complex	322	2772	80	0.02886002886002886	0.2484472049689441
0.0008458522699510929	GO:CC	GO:1990351	transporter complex	330	2772	80	0.02886002886002886	0.24242424242424243
0.0010203260003588772	GO:CC	GO:0034702	ion channel complex	300	2772	74	0.026695526695526696	0.24666666666666667
0.0014077521727554913	GO:CC	GO:0031012	extracellular matrix	553	2772	120	0.04329004329004329	0.21699819168173598
0.0022985566811279607	GO:CC	GO:0032994	protein-lipid complex	41	2772	18	0.006493506493506494	0.43902439024390244
0.0030507317493366102	GO:CC	GO:0034358	plasma lipoprotein particle	38	2772	17	0.006132756132756133	0.4473684210526316
0.0030507317493366102	GO:CC	GO:1990777	lipoprotein particle	38	2772	17	0.006132756132756133	0.4473684210526316
0.020628562942157008	GO:CC	GO:0034361	very-low-density lipoprotein particle	21	2772	11	0.003968253968253968	0.5238095238095238
0.020628562942157008	GO:CC	GO:0034385	triglyceride-rich plasma lipoprotein particle	21	2772	11	0.003968253968253968	0.5238095238095238
0.03836785207198473	GO:CC	GO:0001750	photoreceptor outer segment	93	2772	28	0.010101010101010102	0.3010752688172043
7.808555369087938e-18	GO:MF	GO:0022857	transmembrane transporter activity	1078	2761	273	0.09887721839913075	0.2532467532467532
1.6768805995062615e-17	GO:MF	GO:0005215	transporter activity	1230	2761	301	0.10901847156827237	0.24471544715447155
1.3546692200373818e-13	GO:MF	GO:0015075	ion transmembrane transporter activity	885	2761	222	0.08040565012676566	0.25084745762711863
3.3603242230320573e-11	GO:MF	GO:0015318	inorganic molecular entity transmembrane transporter activity	828	2761	203	0.07352408547627672	0.24516908212560387
2.645205678860686e-10	GO:MF	GO:0008509	anion transmembrane transporter activity	357	2761	106	0.03839188699746469	0.2969187675070028
2.998125002519257e-08	GO:MF	GO:0008514	organic anion transmembrane transporter activity	233	2761	74	0.026801883375588555	0.31759656652360513
1.1191312848969732e-07	GO:MF	GO:0022804	active transmembrane transporter activity	347	2761	97	0.03513219847881202	0.27953890489913547
2.032382948828302e-07	GO:MF	GO:0008324	cation transmembrane transporter activity	646	2761	155	0.05613908004346251	0.23993808049535603
7.058915673785465e-07	GO:MF	GO:0015291	secondary active transmembrane transporter activity	234	2761	71	0.02571532053603767	0.3034188034188034
1.1745284358787245e-06	GO:MF	GO:0003700	DNA-binding transcription factor activity	1199	2761	252	0.09127127852227454	0.21017514595496248
2.9973528223527977e-06	GO:MF	GO:0022890	inorganic cation transmembrane transporter activity	600	2761	142	0.05143064107207534	0.23666666666666666
4.518531073518776e-06	GO:MF	GO:0015081	sodium ion transmembrane transporter activity	157	2761	52	0.018833755885548715	0.33121019108280253
1.0498209539705242e-05	GO:MF	GO:0015293	symporter activity	143	2761	48	0.017385005432814196	0.3356643356643357
2.775844484548468e-05	GO:MF	GO:0015077	monovalent inorganic cation transmembrane transporter activity	393	2761	99	0.035856573705179286	0.25190839694656486
2.9127329803078098e-05	GO:MF	GO:0015267	channel activity	487	2761	117	0.042375950742484604	0.2402464065708419
3.1902984953168024e-05	GO:MF	GO:0022853	active ion transmembrane transporter activity	235	2761	67	0.02426657008330315	0.2851063829787234
3.282084257934762e-05	GO:MF	GO:0022803	passive transmembrane transporter activity	488	2761	117	0.042375950742484604	0.23975409836065573
3.295606755437689e-05	GO:MF	GO:0046943	carboxylic acid transmembrane transporter activity	161	2761	51	0.018471568272365086	0.3167701863354037
4.123731423866594e-05	GO:MF	GO:0005342	organic acid transmembrane transporter activity	162	2761	51	0.018471568272365086	0.3148148148148148
4.8549587725352644e-05	GO:MF	GO:0022836	gated channel activity	341	2761	88	0.03187250996015936	0.25806451612903225
9.561783066435229e-05	GO:MF	GO:0046873	metal ion transmembrane transporter activity	439	2761	106	0.03839188699746469	0.24145785876993167
0.00012155495736720958	GO:MF	GO:0048018	receptor ligand activity	494	2761	116	0.042013763129300975	0.23481781376518218
0.00015956626599322786	GO:MF	GO:0005216	ion channel activity	438	2761	105	0.03802969938428106	0.23972602739726026
0.00022983763185641906	GO:MF	GO:0005509	calcium ion binding	719	2761	156	0.05650126765664614	0.21696801112656466
0.00023626131396356666	GO:MF	GO:0030546	signaling receptor activator activity	500	2761	116	0.042013763129300975	0.232
0.0002719940176945029	GO:MF	GO:0008528	G protein-coupled peptide receptor activity	148	2761	46	0.01666063020644694	0.3108108108108108
0.0006334186555419333	GO:MF	GO:0001653	peptide receptor activity	152	2761	46	0.01666063020644694	0.3026315789473684
0.0009917418435430134	GO:MF	GO:0030545	receptor regulator activity	541	2761	121	0.043824701195219126	0.22365988909426987
0.0011733562010954946	GO:MF	GO:0015179	L-amino acid transmembrane transporter activity	56	2761	23	0.00833031510322347	0.4107142857142857
0.0019275767913122675	GO:MF	GO:0015294	solute:cation symporter activity	103	2761	34	0.01231437884824339	0.3300970873786408
0.00262123243245609	GO:MF	GO:0008083	growth factor activity	164	2761	47	0.017022817819630567	0.2865853658536585
0.002733502939074338	GO:MF	GO:0005201	extracellular matrix structural constituent	169	2761	48	0.017385005432814196	0.28402366863905326
0.003027910849977398	GO:MF	GO:0015171	amino acid transmembrane transporter activity	79	2761	28	0.010141253169141615	0.35443037974683544
0.0037761391748940424	GO:MF	GO:0043169	cation binding	4341	2761	736	0.266570083303151	0.1695461875143976
0.005209221022058805	GO:MF	GO:0046872	metal ion binding	4254	2761	721	0.2611372691053966	0.1694875411377527
0.017247804535111436	GO:MF	GO:0004950	chemokine receptor activity	26	2761	13	0.004708438971387179	0.5
0.017247804535111436	GO:MF	GO:0001637	G protein-coupled chemoattractant receptor activity	26	2761	13	0.004708438971387179	0.5
0.03551980923446063	GO:MF	GO:0019957	C-C chemokine binding	24	2761	12	0.004346251358203549	0.5
0.04474218517133201	GO:MF	GO:0003677	DNA binding	2507	2761	437	0.15827598696124592	0.1743119266055046
0.04552062798819947	GO:MF	GO:0004896	cytokine receptor activity	99	2761	30	0.010865628395508874	0.30303030303030304
2.28669622809818e-29	KEGG	KEGG:05168	Herpes simplex virus 1 infection	488	895	146	0.16312849162011173	0.29918032786885246
3.55985647967519e-15	KEGG	KEGG:04080	Neuroactive ligand-receptor interaction	339	895	93	0.10391061452513967	0.2743362831858407
1.787061671638162e-08	KEGG	KEGG:04974	Protein digestion and absorption	103	895	36	0.04022346368715084	0.34951456310679613
8.604918556821545e-06	KEGG	KEGG:04060	Cytokine-cytokine receptor interaction	292	895	64	0.07150837988826815	0.2191780821917808
0.006085271023201648	KEGG	KEGG:04978	Mineral absorption	59	895	18	0.02011173184357542	0.3050847457627119
0.006857832988247752	KEGG	KEGG:04061	Viral protein interaction with cytokine and cytokine receptor	98	895	25	0.027932960893854747	0.25510204081632654
0.007818092463032514	KEGG	KEGG:05033	Nicotine addiction	40	895	14	0.01564245810055866	0.35
0.008243971847540088	KEGG	KEGG:02010	ABC transporters	45	895	15	0.01675977653631285	0.3333333333333333
0.011517160466038505	KEGG	KEGG:04721	Synaptic vesicle cycle	78	895	21	0.02346368715083799	0.2692307692307692
0.01651922679232217	KEGG	KEGG:04977	Vitamin digestion and absorption	24	895	10	0.0111731843575419	0.4166666666666667
0.04253163106467447	KEGG	KEGG:04610	Complement and coagulation cascades	85	895	21	0.02346368715083799	0.24705882352941178
2.115024319598585e-12	REAC	REAC:R-HSA-500792	GPCR ligand binding	458	1339	118	0.08812546676624347	0.2576419213973799
3.527065917382795e-08	REAC	REAC:R-HSA-425407	SLC-mediated transmembrane transport	248	1339	69	0.05153099327856609	0.2782258064516129
4.1472691395283454e-07	REAC	REAC:R-HSA-373076	Class A/1 (Rhodopsin-like receptors)	327	1339	81	0.060492905153099324	0.24770642201834864
2.1074707516078525e-06	REAC	REAC:R-HSA-382551	Transport of small molecules	720	1339	144	0.1075429424943988	0.2
0.00016709828309620324	REAC	REAC:R-HSA-425393	Transport of inorganic cations/anions and amino acids/oligopeptides	105	1339	33	0.024645257654966394	0.3142857142857143
0.00020991245898580193	REAC	REAC:R-HSA-375276	Peptide ligand-binding receptors	194	1339	50	0.037341299477221805	0.25773195876288657
0.0010293503067336624	REAC	REAC:R-HSA-373080	Class B/2 (Secretin family receptors)	93	1339	29	0.021657953696788648	0.3118279569892473
0.022653697315241306	REAC	REAC:R-HSA-419812	Calcitonin-like ligand receptors	10	1339	7	0.005227781926811053	0.7
