# Supplementary material for: Network neighbors of viral targets and differentially expressed genes in COVID-19 are drug target candidates
Source: Sci Rep. 2021 Sep 23;11:18985. doi: 10.1038/s41598-021-98289-x (PMC8460804; doi:10.1038/s41598-021-98289-x)
Supplement: Supplementary file 9 — Supplementary Information 9. [file 41598_2021_98289_MOESM9_ESM.csv]

Common Neighbor Genes
A2ML1
A3GALT2
A4GALT
AACS
AADAT
AAGAB
AAK1
AARS
AARS2
AARSD1
AASDH
ABAT
ABCA2
ABCB7
ABCC10
ABCC6
ABCD1
ABCD3
ABCE1
ABCF2
ABCF3
ABHD10
ABHD14B
ABHD15
ABHD16A
ABHD17A
ABI2
ABI3
ABL1
ABL2
ABTB2
ACAA1
ACAA2
ACACA
ACACB
ACAD11
ACADL
ACADS
ACADSB
ACAP1
ACAP2
ACAT1
ACBD5
ACER1
ACER2
ACER3
ACHE
ACIN1
ACKR3
ACLY
ACO2
ACOT1
ACOT2
ACOT4
ACOT7
ACOX1
ACOX3
ACP1
ACP5
ACP6
ACPP
ACSBG1
ACSBG2
ACSF3
ACSL4
ACSL5
ACSL6
ACSM5
ACSS2
ACTA1
ACTA2
ACTBL2
ACTC1
ACTG1
ACTG2
ACTL6B
ACTN1
ACTN2
ACTN4
ACTR1A
ACVR1B
ACVRL1
ACY1
ACY3
ADA
ADA2
ADAM11
ADAM32
ADAM33
ADAMTSL4
ADAP1
ADAR
ADARB1
ADCK1
ADCK3
ADCK5
ADCY1
ADCY10
ADCY2
ADCY3
ADCY4
ADCY5
ADCY7
ADCY8
ADCY9
ADCYAP1
ADD1
ADH1A
ADH1B
ADH1C
ADH4
ADH5
ADH6
ADH7
ADI1
ADIPOR1
ADK
ADO
ADORA3
ADPRM
ADRB2
ADRBK1
ADRM1
ADSL
ADSS1
ADSS2
AEN
AFF1
AFP
AGA
AGAP1
AGAP2
AGFG1
AGGF1
AGK
AGL
AGMAT
AGO2
AGO3
AGO4
AGPAT1
AGPAT2
AGPAT3
AGPAT4
AGPAT5
AGR2
AGR3
AGRN
AGTPBP1
AGTR1
AGXT2
AHCY
AHCYL1
AHCYL2
AHNAK2
AHR
AHSA1
AICDA
AIDA
AIFM1
AIMP1
AIMP2
AIRE
AK1
AK2
AK3
AK4
AK5
AK6
AK7
AK8
AK9
AKAP10
AKAP12
AKAP14
AKAP2
AKAP5
AKAP7
AKIP1
AKR1A1
AKR1B1
AKR1C1
AKR1C2
AKR1C3
AKR1C4
AKR1D1
AKR7A2
AKT1
AKT1S1
AKT2
AKTIP
ALAD
ALAS2
ALB
ALDH18A1
ALDH1A3
ALDH1B1
ALDH1L2
ALDH2
ALDH3A2
ALDH3B1
ALDH3B2
ALDH6A1
ALDH7A1
ALDH9A1
ALDOA
ALG1
ALG10
ALG10B
ALG12
ALG13
ALG14
ALG2
ALG3
ALG6
ALG9
ALK
ALKBH3
ALLC
ALOX12
ALOX12B
ALOX15
ALOX15B
ALOX5
ALOXE3
ALPG
ALPI
ALPP
ALS2
ALS2CR11
ALX3
ALYREF
AMD1
AMDHD2
AMER1
AMHR2
AMMECR1
AMOT
AMOTL2
AMPD1
AMPD2
AMPD3
AMPH
AMTN
AMY1A
AMY1C
ANAPC1
ANAPC10
ANAPC2
ANAPC4
ANAPC5
ANGPT2
ANGPTL7
ANK2
ANKHD1
ANKHD1-EIF4EBP3
ANKIB1
ANKLE2
ANKRD13A
ANKRD17
ANKRD28
ANKRD32
ANKRD34A
ANKRD36BP1
ANKRD39
ANKRD40
ANKRD46
ANKRD52
ANKRD55
ANLN
ANO7
ANP32B
ANP32E
ANPEP
ANTXR1
ANXA1
ANXA13
ANXA2
ANXA5
ANXA7
ANXA8
AOC2
AOC3
AOX1
AP1B1
AP1G1
AP1G2
AP1M2
AP1S1
AP2A1
AP2B1
AP2S1
AP3D1
AP3M1
AP3S1
AP3S2
AP4S1
APBA3
APBB1
APBB2
APEX1
APEX2
APH1A
API5
APIP
APLNR
APLP1
APOA1
APOA1BP
APOB
APOBEC3D
APOD
APOE
APOOL
APP
APPBP2
APPL1
APPL2
APRT
APTX
AQP2
AQP4
AQR
AR
ARAF
ARF1
ARF4
ARFGAP1
ARFGAP2
ARFGEF1
ARFGEF2
ARFIP2
ARG1
ARHGAP1
ARHGAP19
ARHGAP22
ARHGAP23
ARHGAP35
ARHGAP36
ARHGAP5
ARHGDIA
ARHGEF11
ARHGEF12
ARHGEF2
ARHGEF40
ARHGEF9
ARID1A
ARID1B
ARID3B
ARID4B
ARID5A
ARID5B
ARIH1
ARIH2
ARL1
ARL14EP
ARL15
ARL3
ARL4A
ARL4C
ARL4D
ARL5A
ARL6
ARL6IP1
ARL6IP5
ARL8B
ARMC1
ARMC8
ARMCX3
ARNT
ARNT2
ARNTL
ARPC3
ARPC5
ARRDC3
ARSA
ARSG
ART3
ARV1
ASAH1
ASAH2
ASAP1
ASAP3
ASB10
ASB12
ASB13
ASB14
ASB15
ASB16
ASB17
ASB18
ASB2
ASB3
ASB4
ASB5
ASB7
ASB9
ASCC1
ASCC2
ASCC3
ASGR2
ASH1L
ASH2L
ASIC3
ASNA1
ASNS
ASPDH
ASPH
ASPHD2
ASPM
ASS1
ASXL2
ATAD2
ATAD3C
ATAD5
ATF2
ATF6
ATG101
ATG5
ATG7
ATIC
ATL3
ATN1
ATOH1
ATP12A
ATP13A1
ATP13A2
ATP1B3
ATP1B4
ATP2A1
ATP2A2
ATP2A3
ATP2B1
ATP2B2
ATP2C1
ATP4A
ATP4B
ATP5A1
ATP5B
ATP5C1
ATP5D
ATP5E
ATP5F1
ATP5F1B
ATP5H
ATP5J
ATP5O
ATP6AP2
ATP6V0D1
ATP6V0D2
ATP6V0E1
ATP6V1B1
ATP6V1B2
ATP6V1C2
ATP6V1D
ATP6V1H
ATP9A
ATR
ATXN1
ATXN10
ATXN1L
ATXN2
ATXN2L
ATXN3
ATXN7
AUH
AUP1
AURKA
AURKAIP1
AURKB
AUTS2
AVP
AXIN1
AZGP1
AZI2
B3GALNT1
B3GALT5
B3GALT6
B3GALTL
B3GAT3
B3GLCT
B3GNT2
B3GNT3
B4GALNT3
B4GALNT4
B4GALT1
B4GALT4
B4GALT6
B4GALT7
B4GAT1
BABAM1
BACE1
BAG1
BAG2
BAG4
BAG6
BAHD1
BAK1
BANF1
BARD1
BAX
BAZ1A
BBOX1
BBS1
BBS5
BBS7
BBX
BCAR1
BCAR3
BCAS2
BCAT1
BCCIP
BCKDHA
BCKDHB
BCL10
BCL11A
BCL11B
BCL2
BCL2L11
BCL2L2
BCL6
BCL6B
BCL7C
BCLAF1
BDH1
BECN1
BEX2
BHLHA15
BHLHE41
BHMT
BHMT2
BICD2
BID
BIRC2
BIRC3
BIRC5
BIRC6
BIRC7
BLK
BLM
BLMH
BLOC1S6
BLVRA
BLVRB
BLZF1
BMF
BMI1
BMP1
BMP15
BMP2K
BMP4
BMP7
BMPR1A
BNIP1
BNIPL
BOD1L1
BOLA1
BOLA2
BOLA2B
BOLA3
BOP1
BPNT1
BRAF
BRAP
BRAT1
BRCA1
BRCA2
BRD1
BRD7
BRE
BRF1
BRIP1
BRIX1
BRMS1
BRMS1L
BRPF1
BSCL2
BSG
BSPRY
BST1
BTAF1
BTBD1
BTBD10
BTBD2
BTD
BTF3
BTG3
BTK
BTN2A1
BTNL3
BTNL8
BTRC
BUB1
BUB1B
BUB3
BUD31
BYSL
BZW1
C10orf35
C10orf88
C11orf30
C11orf31
C11orf57
C11orf58
C12orf49
C14orf1
C14orf105
C14orf166
C14orf169
C14orf178
C14orf80
C15orf27
C15orf39
C16orf45
C16orf58
C16orf87
C17orf59
C17orf85
C17orf89
C18orf25
C18orf8
C19orf70
C19orf80
C1GALT1
C1GALT1C1
C1QBP
C1QL4
C1orf106
C1orf109
C1orf131
C1orf226
C1orf35
C1orf68
C1orf85
C1orf87
C1orf94
C20orf195
C20orf196
C21orf33
C2CD5
C2orf47
C2orf71
C2orf88
C3
C3orf17
C4A
C4orf26
C4orf32
C5AR2
C5orf28
C5orf34
C5orf60
C6orf120
C6orf141
C6orf165
C6orf203
C7orf55
C7orf60
C9orf24
C9orf41
C9orf72
C9orf78
CA10
CA14
CA5A
CA9
CAB39
CABIN1
CACNA2D1
CACNG4
CACNG5
CACYBP
CAD
CALCOCO1
CALCOCO2
CALM1
CALM2
CALML3
CALML5
CALR3
CALU
CAMK2A
CAMK2D
CAMK2G
CAMKMT
CAMKV
CAMLG
CAMSAP2
CAMSAP3
CAND1
CAND2
CANX
CAP1
CAPG
CAPN1
CAPN13
CAPN2
CAPN6
CAPNS1
CAPRIN1
CAPZA2
CAPZB
CARD10
CARD8
CARD9
CARHSP1
CARM1
CARS
CASC3
CASK
CASP1
CASP10
CASP14
CASP3
CASP8
CASQ2
CASR
CAT
CAV1
CAV3
CBFA2T3
CBFB
CBL
CBLN4
CBR1
CBR3
CBR4
CBS
CBSL
CBWD1
CBX1
CBX2
CBX3
CBX5
CBX6
CBX8
CCAR2
CCBL1
CCDC101
CCDC102B
CCDC106
CCDC107
CCDC115
CCDC12
CCDC121
CCDC132
CCDC136
CCDC138
CCDC14
CCDC146
CCDC150
CCDC155
CCDC158
CCDC172
CCDC174
CCDC183
CCDC186
CCDC33
CCDC36
CCDC40
CCDC50
CCDC53
CCDC58
CCDC59
CCDC6
CCDC61
CCDC65
CCDC67
CCDC68
CCDC69
CCDC74B
CCDC8
CCDC82
CCDC83
CCDC85B
CCDC87
CCDC88A
CCDC92
CCDC93
CCDC94
CCHCR1
CCL22
CCNA2
CCNB1
CCNB2
CCNC
CCND1
CCND2
CCND3
CCNE1
CCNH
CCNJL
CCNK
CCNL1
CCNL2
CCNT1
CCNT2
CCRN4L
CCT2
CCT3
CCT4
CCT5
CCT6A
CCT6B
CCT7
CCT8
CCZ1
CD151
CD1B
CD207
CD22
CD247
CD27
CD274
CD2AP
CD2BP2
CD36
CD3E
CD4
CD40
CD44
CD46
CD47
CD63
CD70
CD79B
CD81
CD83
CD9
CD93
CD96
CD99L2
CDADC1
CDC14B
CDC16
CDC20
CDC20B
CDC23
CDC25A
CDC25B
CDC25C
CDC26
CDC27
CDC40
CDC42
CDC42BPB
CDC42BPG
CDC45
CDC5L
CDC6
CDC7
CDC73
CDCA5
CDH1
CDH13
CDH19
CDIPT
CDK1
CDK11A
CDK12
CDK13
CDK14
CDK15
CDK16
CDK17
CDK18
CDK2
CDK20
CDK2AP1
CDK2AP2
CDK3
CDK5
CDK5RAP1
CDK6
CDK7
CDK9
CDKL3
CDKL4
CDKL5
CDKN1A
CDKN1B
CDKN1C
CDKN2A
CDKN2C
CDO1
CDON
CDR2
CDRT15
CDS1
CDS2
CDX1
CDYL
CEBPA
CEBPE
CEBPZ
CEL
CELA1
CELF1
CENPA
CENPB
CENPC
CENPH
CENPJ
CENPK
CENPM
CENPP
CENPU
CENPV
CENPW
CEP128
CEP131
CEP152
CEP162
CEP170
CEP170P1
CEP19
CEP192
CEP290
CEP295
CEP44
CEP55
CEP57
CEP57L1
CEP70
CEP72
CEP76
CEP78
CEPT1
CER1
CERCAM
CERK
CERS1
CERS2
CERS3
CERS4
CES1
CES2
CETN2
CETN3
CFAP97
CFL2
CFTR
CGB2
CGN
CGNL1
CHAC1
CHAC2
CHAF1B
CHAT
CHCHD1
CHCHD10
CHCHD2
CHCHD3
CHCHD4
CHCHD6
CHD1
CHD2
CHD3
CHD5
CHD6
CHD7
CHD8
CHD9
CHDC2
CHDH
CHEK1
CHEK2
CHERP
CHGB
CHIA
CHIC2
CHKA
CHKB
CHM
CHML
CHMP2B
CHMP3
CHMP4A
CHMP4B
CHMP5
CHORDC1
CHP1
CHPT1
CHRM3
CHRM4
CHRNA3
CHRNA9
CHRND
CHST10
CHST11
CHST12
CHST13
CHST14
CHST15
CHST3
CHST7
CHST8
CHST9
CHSY1
CHSY3
CHTOP
CHUK
CIAO1
CIB3
CIC
CIITA
CINP
CIRH1A
CISH
CKAP2
CKAP4
CKAP5
CKB
CKM
CLASP1
CLASP2
CLASRP
CLCN2
CLCN3
CLDN10
CLEC11A
CLEC14A
CLEC16A
CLEC1B
CLEC2D
CLEC3A
CLEC4G
CLEC5A
CLGN
CLIC1
CLIC4
CLINT1
CLIP1
CLK1
CLK2
CLK3
CLK4
CLN5
CLN8
CLNS1A
CLOCK
CLPB
CLPX
CLSPN
CLSTN1
CLTA
CLTB
CLTC
CLTCL1
CLU
CLUAP1
CLUH
CMAS
CMBL
CMPK1
CMPK2
CNBP
CNIH4
CNKSR1
CNKSR2
CNN2
CNN3
CNOT1
CNOT11
CNOT2
CNOT6
CNOT7
CNTNAP1
CNTNAP3
COA1
COASY
COBLL1
COG2
COG3
COG5
COG6
COG8
COIL
COL14A1
COL1A1
COL1A2
COL23A1
COL4A2
COL4A3BP
COL9A1
COLEC10
COLEC11
COLEC12
COLGALT2
COMMD1
COMMD10
COMMD3
COMMD4
COMMD6
COMTD1
COPA
COPB1
COPB2
COPE
COPS2
COPS3
COPS4
COPS5
COPS6
COPS7A
COPS7B
COPS8
COQ2
COQ3
COQ5
COQ6
COQ7
COQ9
CORO1A
CORO1B
CORO1C
CORO6
CORO7
COX1
COX10
COX15
COX2
COX4I1
COX5A
COX5B
COX6A1
COX6B1
COX6C
COX7A2
CP
CPA2
CPD
CPEB2
CPLX3
CPM
CPNE2
CPNE4
CPNE7
CPOX
CPS1
CPSF2
CPSF3
CPSF4
CPSF4L
CPSF6
CPT1A
CPT1B
CPT1C
CPT2
CPTP
CPVL
CRABP2
CRACR2A
CRACR2B
CRBN
CRCT1
CREB1
CREB3
CREB3L1
CREB3L3
CREBBP
CRELD1
CRIP2
CRK
CRKL
CRLS1
CRMP1
CRNKL1
CRNN
CROCC
CRP
CRTC2
CRX
CRY1
CRYL1
CS
CSE1L
CSGALNACT1
CSGALNACT2
CSK
CSNK1A1
CSNK1E
CSNK1G2
CSNK2A1
CSPP1
CSRP2
CST6
CSTF1
CSTF2T
CTAGE5
CTBP1
CTBP2
CTDSP1
CTH
CTLA4
CTNNA2
CTNNA3
CTNNAL1
CTNNB1
CTNNBL1
CTNND1
CTPS2
CTSA
CTSD
CTSZ
CTTN
CTTNBP2NL
CUL1
CUL3
CUL4A
CUL4B
CUL5
CUL7
CUTA
CWC15
CXXC1
CXorf57
CYB5D2
CYB5R1
CYB5R2
CYB5R4
CYB5RL
CYBRD1
CYFIP1
CYLD
CYP11A1
CYP11B1
CYP11B2
CYP17A1
CYP1A2
CYP1B1
CYP21A2
CYP24A1
CYP2A6
CYP2B6
CYP2C18
CYP2C19
CYP2C8
CYP2C9
CYP2E1
CYP2J2
CYP3A4
CYP3A7
CYP3A7-CYP3A51P
CYP4A11
CYP4A22
CYP4F12
CYP4F2
CYP4F8
CYP7A1
CYTH2
DAB2
DAG1
DAK
DAP3
DAPK1
DARS
DAXX
DAZAP1
DBH
DBN1
DBT
DCAF10
DCAF11
DCAF12
DCAF4
DCAF4L2
DCAF8
DCD
DCK
DCLK1
DCLRE1C
DCP1A
DCP1B
DCP2
DCT
DCTD
DCTN1
DCTN2
DCTN4
DCTN5
DCUN1D1
DCUN1D5
DCX
DDA1
DDAH2
DDC
DDOST
DDX1
DDX11
DDX11L8
DDX17
DDX18
DDX19A
DDX19B
DDX20
DDX24
DDX39A
DDX39B
DDX3X
DDX3Y
DDX41
DDX42
DDX46
DDX50
DDX54
DDX6
DEC1
DECR1
DEF6
DEF8
DEFA1
DEFA5
DEFB1
DEFB104A
DEFB121
DEGS1
DEGS2
DEK
DENND1A
DENND2D
DENND4A
DENND5A
DENR
DEPDC1B
DEPDC5
DERL1
DERL2
DERL3
DES
DESI1
DET1
DFFB
DFNA5
DFNB31
DGAT1
DGAT2
DGCR14
DGCR6
DGCR8
DGKA
DGKB
DGKD
DGKG
DGKH
DGKI
DGKK
DGKQ
DGKZ
DHCR24
DHCR7
DHFR
DHFR2
DHODH
DHRS11
DHRS2
DHRS4
DHTKD1
DHX15
DHX30
DHX34
DHX35
DHX36
DHX37
DHX38
DHX40
DHX57
DHX8
DIABLO
DIAPH1
DIAPH3
DIEXF
DIMT1
DIO2
DIP2A
DIRAS2
DIRAS3
DIS3
DIS3L
DISC1
DKC1
DKKL1
DLAT
DLC1
DLD
DLEU1
DLG3
DLG5
DLGAP5
DLK1
DLK2
DLST
DMAP1
DMD
DMPK
DMRTB1
DMTN
DMWD
DNA2
DNAAF2
DNAAF5
DNAJA1
DNAJA2
DNAJA3
DNAJB1
DNAJB11
DNAJB12
DNAJB6
DNAJC1
DNAJC10
DNAJC13
DNAJC21
DNAJC6
DNAJC8
DNAJC9
DNASE1L2
DNASE2B
DNM1L
DNM2
DNM3
DNMT3A
DNMT3B
DNPEP
DNTTIP1
DOC2A
DOCK11
DOCK5
DOCK7
DOCK8
DOHH
DOLK
DOLPP1
DONSON
DOT1L
DPAGT1
DPEP1
DPEP2
DPF2
DPF3
DPH3
DPM1
DPP9
DPPA2
DPPA4
DPY30
DPYD
DPYS
DPYSL2
DPYSL3
DRAP1
DRD3
DRG1
DROSHA
DSC1
DSE
DSG1
DSG2
DSP
DST
DSTN
DTL
DTNA
DTNB
DTNBP1
DTX1
DTX3L
DTYMK
DUS3L
DUSP11
DUSP12
DUSP13
DUSP14
DUSP16
DUSP2
DUSP22
DUSP23
DUSP26
DUSP28
DUSP3
DUSP5
DUSP6
DUSP8
DUSP9
DUT
DVL2
DVL3
DXO
DYM
DYNC1H1
DYNC1I2
DYNC1LI1
DYNC2H1
DYNLL1
DYNLL2
DYRK1A
DYRK1B
DZIP3
E2F1
E2F2
E2F4
E2F6
E2F7
EAF1
EAF2
EAPP
EARS2
EBNA1BP2
EBP
ECD
ECH1
ECHS1
ECI1
ECI2
ECT2
EDA
EDEM1
EDEM2
EDRF1
EEA1
EEF1A1P5
EEF1A2
EEF1B2
EEF1D
EEF1E1
EEF1G
EEF2K
EFNB1
EFNB2
EFNB3
EFTUD2
EGFL6
EGFLAM
EGFR
EGLN1
EGLN3
EHD1
EHD2
EHHADH
EHMT2
EI24
EID1
EIF1
EIF1AX
EIF2A
EIF2AK1
EIF2B1
EIF2B2
EIF2B3
EIF2S1
EIF2S2
EIF2S3
EIF3C
EIF3E
EIF3F
EIF3H
EIF3I
EIF3J
EIF3K
EIF3L
EIF3M
EIF4A1
EIF4A2
EIF4A3
EIF4B
EIF4EBP2
EIF4EBP3
EIF4ENIF1
EIF4G2
EIF4G3
EIF5A
EIF5A2
EIF6
ELAVL1
ELAVL2
ELAVL3
ELAVL4
ELMO2
ELMSAN1
ELOVL1
ELOVL2
ELOVL3
ELOVL4
ELOVL5
ELOVL6
ELOVL7
ELP3
EMC2
EMC3
EMC4
EMC6
EMC7
EMD
EMG1
EMILIN1
EMILIN2
ENAH
ENO1
ENO2
ENO3
ENOPH1
ENPP1
ENPP2
ENPP3
ENPP4
ENPP6
ENPP7
ENSA
ENTHD2
ENTPD1
ENTPD2
ENTPD3
ENTPD4
ENTPD5
ENTPD8
EOGT
EP300
EPB41L1
EPB41L2
EPB41L3
EPB41L4B
EPB41L5
EPB42
EPHA1
EPHA2
EPHA7
EPHB2
EPHX2
EPM2A
EPM2AIP1
EPN1
EPN3
EPOR
EPPK1
EPRS
EPRS1
EPS15
EPS15L1
EPS8
ERAL1
ERAP1
ERBB2
ERBB3
ERBB4
ERCC3
ERCC8
ERF
ERG
ERGIC2
ERGIC3
ERH
ERLIN1
ERLIN2
ERMAP
ERN1
ERO1L
ERP29
ERRFI1
ESAM
ESCO1
ESCO2
ESPL1
ESR1
ESR2
ESRRB
ESYT1
ETAA1
ETF1
ETFB
ETNK1
ETNK2
ETNPPL
EVI5L
EVPL
EWSR1
EXO1
EXOC1
EXOC3
EXOC5
EXOC6
EXOC7
EXOC8
EXOSC1
EXOSC10
EXOSC4
EXOSC6
EXOSC9
EXT1
EXT2
EXTL1
EXTL2
EXTL3
EYA1
EYA2
EYA3
EYA4
EZH1
EZH2
F7
FABP5
FADD
FAF1
FAF2
FAH
FAHD1
FAM103A1
FAM107A
FAM110A
FAM110B
FAM115A
FAM117B
FAM120A
FAM122B
FAM124A
FAM124B
FAM127A
FAM131B
FAM134A
FAM136A
FAM161A
FAM167A
FAM174A
FAM177A1
FAM188A
FAM189A2
FAM193B
FAM195B
FAM19A3
FAM19A4
FAM208A
FAM214A
FAM219A
FAM21C
FAM3C
FAM46A
FAM50A
FAM50B
FAM53C
FAM58A
FAM60A
FAM63B
FAM64A
FAM71C
FAM74A4
FAM90A1
FAM96B
FAM98B
FAM9A
FAM9B
FAN1
FANCC
FANCD2
FANCG
FAR1
FARP1
FARS2
FARSB
FAS
FASN
FAU
FBF1
FBL
FBRS
FBRSL1
FBXL16
FBXL18
FBXL2
FBXL20
FBXL4
FBXL5
FBXO11
FBXO17
FBXO2
FBXO21
FBXO22
FBXO25
FBXO28
FBXO3
FBXO30
FBXO32
FBXO42
FBXO44
FBXO45
FBXO6
FBXO7
FBXW11
FBXW2
FBXW4
FBXW7
FBXW8
FCHSD2
FCSK
FDPS
FECH
FEM1B
FEN1
FERD3L
FERMT3
FEZ1
FGB
FGD1
FGF11
FGF2
FGF3
FGF8
FGFR1OP2
FGFR2
FGFR3
FGFR4
FGL1
FHIT
FHL1
FHL2
FHOD1
FIGF
FIP1L1
FKBP14
FKBP3
FKBP5
FKBPL
FLCN
FLG
FLG2
FLNA
FLNB
FLOT2
FLT3
FLT4
FMNL1
FMR1
FN1
FN3KRP
FNBP1
FNBP1L
FNBP4
FNDC3B
FNDC4
FNDC5
FNTB
FOXA1
FOXA3
FOXB1
FOXC2
FOXD4L6
FOXE1
FOXF1
FOXG1
FOXH1
FOXI2
FOXK1
FOXL1
FOXL2
FOXM1
FOXN2
FOXN3
FOXO1
FOXP2
FOXP3
FOXQ1
FOXRED1
FOXS1
FPGS
FPGT
FRAS1
FRAT1
FRG1
FRMD5
FRMD6
FRS3
FRYL
FRZB
FSCN1
FSD1
FSD2
FSTL1
FTL
FTSJ1
FTSJ3
FUBP1
FUBP3
FUCA1
FUCA2
FUNDC2
FUOM
FUS
FUT2
FUT3
FUT8
FUT9
FUZ
FXN
FXR1
FXR2
FXYD1
FXYD3
FXYD6
FYN
FYTTD1
FZD1
FZD10
FZR1
G6PC
G6PC2
G6PC3
GAA
GAB1
GAB2
GABARAPL1
GABARAPL2
GABBR1
GABRA3
GABRG2
GADD45GIP1
GAL3ST1
GALC
GALE
GALK1
GALM
GALNT1
GALNT10
GALNT11
GALNT12
GALNT13
GALNT14
GALNT16
GALNT17
GALNT2
GALNT3
GALNT4
GALNT5
GALNT6
GALNT7
GALNT8
GALNT9
GALNTL5
GALNTL6
GAMT
GAN
GANAB
GANC
GAPDH
GAR1
GARS
GART
GAST
GATA1
GATA3
GATA4
GATAD1
GATAD2A
GATAD2B
GATB
GATC
GATM
GBA
GBE1
GBGT1
GBP2
GCAT
GCDH
GCK
GCLC
GCLM
GCN1L1
GCNT2
GDA
GDF10
GDF11
GDF9
GDI1
GDI2
GDPD1
GDPD3
GEM
GEMIN2
GEMIN4
GEMIN5
GEMIN6
GFAP
GFI1
GFI1B
GFM1
GFOD1
GFPT1
GFPT2
GGA2
GGCT
GGT1
GGT5
GGT6
GGT7
GHDC
GID8
GIGYF1
GIMAP2
GIMAP8
GINM1
GIP
GIPC1
GIT1
[truncated: 3,871 more rows]
